# Supplementary material
Source: publisher figshare collection journal article supplement (https://rs.figshare.com/ndownloader/files/14759750)
Supplement: Supplementary file 1 [file 14759750]

LM=6
254.00000 741.00000
582.00000 983.00000
815.00000 716.00000
698.00000 569.00000
507.00000 622.00000
459.00000 784.00000
IMAGE=C:\Users\Will\Desktop\Salmon photos - analysis\Edited photos\YC2 1SW rotate&crop\IMG_0001. FISH 496 (2ND - NEW CAMERA)_result_result.JPG
ID=0 
SCALE=0.024144
LM=6
644.00000 800.00000
927.00000 964.00000
1090.00000 766.00000
974.00000 622.00000
821.00000 695.00000
804.00000 832.00000
IMAGE=C:\Users\Will\Desktop\Salmon photos - analysis\Edited photos\YC2 1SW rotate&crop\IMG_0002_result_result.JPG
ID=1 
SCALE=0.024383
LM=6
114.00000 808.00000
461.00000 1054.00000
690.00000 805.00000
611.00000 595.00000
353.00000 680.00000
322.00000 846.00000
IMAGE=C:\Users\Will\Desktop\Salmon photos - analysis\Edited photos\YC2 1SW rotate&crop\IMG_0003_result_result.JPG
ID=2 
SCALE=0.024505
LM=6
325.00000 914.00000
732.00000 1081.00000
966.00000 787.00000
846.00000 621.00000
613.00000 706.00000
577.00000 890.00000
IMAGE=C:\Users\Will\Desktop\Salmon photos - analysis\Edited photos\YC2 1SW rotate&crop\IMG_0004_result_result.JPG
ID=3 
SCALE=0.024376
LM=6
569.00000 906.00000
898.00000 985.00000
994.00000 738.00000
905.00000 635.00000
732.00000 741.00000
735.00000 865.00000
IMAGE=C:\Users\Will\Desktop\Salmon photos - analysis\Edited photos\YC2 1SW rotate&crop\IMG_0005_result_result.JPG
ID=4 
SCALE=0.024262
LM=6
396.00000 644.00000
636.00000 863.00000
835.00000 732.00000
779.00000 561.00000
609.00000 589.00000
555.00000 713.00000
IMAGE=C:\Users\Will\Desktop\Salmon photos - analysis\Edited photos\YC2 1SW rotate&crop\IMG_0006_result_result.JPG
ID=5 
SCALE=0.024258
LM=6
859.00000 842.00000
1155.00000 987.00000
1290.00000 838.00000
1189.00000 648.00000
1017.00000 732.00000
1011.00000 870.00000
IMAGE=C:\Users\Will\Desktop\Salmon photos - analysis\Edited photos\YC2 1SW rotate&crop\IMG_0007_result_result.JPG
ID=6 
SCALE=0.024144
LM=6
430.00000 744.00000
742.00000 915.00000
940.00000 687.00000
831.00000 561.00000
653.00000 622.00000
629.00000 755.00000
IMAGE=C:\Users\Will\Desktop\Salmon photos - analysis\Edited photos\YC2 1SW rotate&crop\IMG_0008_result_result.JPG
ID=7 
SCALE=0.024383
LM=6
459.00000 870.00000
858.00000 1025.00000
1043.00000 772.00000
913.00000 614.00000
715.00000 688.00000
696.00000 845.00000
IMAGE=C:\Users\Will\Desktop\Salmon photos - analysis\Edited photos\YC2 1SW rotate&crop\IMG_0009_result_result.JPG
ID=8 
SCALE=0.024262
LM=6
244.00000 813.00000
817.00000 1168.00000
1058.00000 854.00000
896.00000 531.00000
638.00000 660.00000
555.00000 892.00000
IMAGE=C:\Users\Will\Desktop\Salmon photos - analysis\Edited photos\YC2 1SW rotate&crop\IMG_0011_result_result.JPG
ID=9 
SCALE=0.024092
LM=6
445.00000 978.00000
785.00000 1173.00000
984.00000 923.00000
843.00000 751.00000
642.00000 843.00000
621.00000 998.00000
IMAGE=C:\Users\Will\Desktop\Salmon photos - analysis\Edited photos\YC2 1SW rotate&crop\IMG_0013_result_result.JPG
ID=10 
SCALE=0.024271
LM=6
306.00000 855.00000
714.00000 1069.00000
842.00000 847.00000
728.00000 653.00000
551.00000 715.00000
521.00000 880.00000
IMAGE=C:\Users\Will\Desktop\Salmon photos - analysis\Edited photos\YC2 1SW rotate&crop\IMG_0014_result_result.JPG
ID=11 
SCALE=0.024153
LM=6
752.00000 831.00000
1030.00000 985.00000
1184.00000 800.00000
1087.00000 669.00000
926.00000 719.00000
907.00000 850.00000
IMAGE=C:\Users\Will\Desktop\Salmon photos - analysis\Edited photos\YC2 1SW rotate&crop\IMG_0016_result_result.JPG
ID=13 
SCALE=0.024376
LM=6
881.00000 721.00000
1151.00000 918.00000
1348.00000 760.00000
1275.00000 610.00000
1098.00000 631.00000
1055.00000 764.00000
IMAGE=C:\Users\Will\Desktop\Salmon photos - analysis\Edited photos\YC2 1SW rotate&crop\IMG_0018_result_result.JPG
ID=15 
SCALE=0.024150
LM=6
583.00000 850.00000
903.00000 1026.00000
1056.00000 818.00000
953.00000 661.00000
789.00000 726.00000
750.00000 866.00000
IMAGE=C:\Users\Will\Desktop\Salmon photos - analysis\Edited photos\YC2 1SW rotate&crop\IMG_0019_result_result.JPG
ID=16 
SCALE=0.024148
LM=6
695.00000 760.00000
996.00000 956.00000
1147.00000 750.00000
1065.00000 588.00000
881.00000 650.00000
859.00000 786.00000
IMAGE=C:\Users\Will\Desktop\Salmon photos - analysis\Edited photos\YC2 1SW rotate&crop\IMG_0021_result_result.JPG
ID=18 
SCALE=0.024265

LM=6
266.00000 945.00000
765.00000 1215.00000
1017.00000 911.00000
893.00000 658.00000
637.00000 772.00000
568.00000 974.00000
IMAGE=C:\Users\Will\Desktop\Salmon photos - analysis\Edited photos\YC2 1SW rotate&crop\IMG_0023_result_result.JPG
ID=20 
SCALE=0.024389
LM=6
881.00000 1032.00000
1112.00000 1117.00000
1218.00000 949.00000
1107.00000 858.00000
998.00000 930.00000
1001.00000 1030.00000
IMAGE=C:\Users\Will\Desktop\Salmon photos - analysis\Edited photos\YC2 1SW rotate&crop\IMG_0024_result_result.JPG
ID=21 
SCALE=0.024148
LM=6
1082.00000 848.00000
1301.00000 964.00000
1429.00000 846.00000
1331.00000 749.00000
1234.00000 782.00000
1211.00000 863.00000
IMAGE=C:\Users\Will\Desktop\Salmon photos - analysis\Edited photos\YC2 1SW rotate&crop\IMG_0025_result_result.JPG
ID=22 
SCALE=0.024028
LM=6
520.00000 754.00000
795.00000 963.00000
1015.00000 749.00000
907.00000 570.00000
733.00000 649.00000
693.00000 796.00000
IMAGE=C:\Users\Will\Desktop\Salmon photos - analysis\Edited photos\YC2 1SW rotate&crop\IMG_0027_result_result.JPG
ID=23 
SCALE=0.024028
LM=6
842.00000 953.00000
1083.00000 1069.00000
1184.00000 923.00000
1110.00000 831.00000
976.00000 872.00000
962.00000 962.00000
IMAGE=C:\Users\Will\Desktop\Salmon photos - analysis\Edited photos\YC2 1SW rotate&crop\IMG_0028_result_result.JPG
ID=24 
SCALE=0.024034
LM=6
344.00000 725.00000
703.00000 987.00000
932.00000 716.00000
825.00000 523.00000
614.00000 597.00000
545.00000 769.00000
IMAGE=C:\Users\Will\Desktop\Salmon photos - analysis\Edited photos\YC2 1SW rotate&crop\IMG_0029_result_result.JPG
ID=25 
SCALE=0.024154
LM=6
197.00000 925.00000
623.00000 1171.00000
817.00000 882.00000
676.00000 664.00000
468.00000 768.00000
436.00000 956.00000
IMAGE=C:\Users\Will\Desktop\Salmon photos - analysis\Edited photos\YC2 1SW rotate&crop\IMG_0030_result_result.JPG
ID=26 
SCALE=0.024154
LM=6
572.00000 914.00000
833.00000 1044.00000
950.00000 852.00000
844.00000 716.00000
711.00000 795.00000
699.00000 923.00000
IMAGE=C:\Users\Will\Desktop\Salmon photos - analysis\Edited photos\YC2 1SW rotate&crop\IMG_0031_result_result.JPG
ID=27 
SCALE=0.024272
LM=6
293.00000 659.00000
652.00000 938.00000
935.00000 678.00000
839.00000 464.00000
615.00000 522.00000
534.00000 694.00000
IMAGE=C:\Users\Will\Desktop\Salmon photos - analysis\Edited photos\YC2 1SW rotate&crop\IMG_0032_result_result.JPG
ID=28 
SCALE=0.024155
LM=6
468.00000 929.00000
883.00000 1178.00000
1128.00000 869.00000
1015.00000 684.00000
779.00000 781.00000
710.00000 956.00000
IMAGE=C:\Users\Will\Desktop\Salmon photos - analysis\Edited photos\YC2 1SW rotate&crop\IMG_0033_result_result.JPG
ID=29 
SCALE=0.023808
LM=6
566.00000 873.00000
928.00000 1017.00000
1093.00000 799.00000
950.00000 640.00000
788.00000 728.00000
774.00000 872.00000
IMAGE=C:\Users\Will\Desktop\Salmon photos - analysis\Edited photos\YC2 1SW rotate&crop\IMG_0034_result_result.JPG
ID=30 
SCALE=0.024038
LM=6
725.00000 784.00000
1017.00000 916.00000
1173.00000 728.00000
1059.00000 614.00000
920.00000 668.00000
896.00000 784.00000
IMAGE=C:\Users\Will\Desktop\Salmon photos - analysis\Edited photos\YC2 1SW rotate&crop\IMG_0035_result_result.JPG
ID=31 
SCALE=0.023923
LM=6
321.00000 793.00000
720.00000 1043.00000
937.00000 775.00000
840.00000 574.00000
589.00000 674.00000
548.00000 840.00000
IMAGE=C:\Users\Will\Desktop\Salmon photos - analysis\Edited photos\YC2 1SW rotate&crop\IMG_0036_result_result.JPG
ID=32 
SCALE=0.045455
LM=6
526.00000 912.00000
879.00000 1078.00000
1042.00000 792.00000
918.00000 671.00000
752.00000 758.00000
728.00000 906.00000
IMAGE=C:\Users\Will\Desktop\Salmon photos - analysis\Edited photos\YC2 1SW rotate&crop\IMG_0037_result_result.JPG
ID=33 
SCALE=0.023923
LM=6
679.00000 963.00000
972.00000 1071.00000
1093.00000 882.00000
982.00000 726.00000
837.00000 829.00000
834.00000 955.00000
IMAGE=C:\Users\Will\Desktop\Salmon photos - analysis\Edited photos\YC2 1SW rotate&crop\IMG_0038_result_result.JPG
ID=34 
SCALE=0.004808
LM=6
730.00000 806.00000
1022.00000 953.00000
1165.00000 753.00000
1036.00000 635.00000
921.00000 699.00000
897.00000 822.00000
IMAGE=C:\Users\Will\Desktop\Salmon photos - analysis\Edited photos\YC2 1SW rotate&crop\IMG_0039_result_result.JPG
ID=35 
SCALE=0.023923
LM=6
724.00000 817.00000
998.00000 969.00000
1170.00000 790.00000
1104.00000 674.00000
929.00000 712.00000
901.00000 822.00000
IMAGE=C:\Users\Will\Desktop\Salmon photos - analysis\Edited photos\YC2 1SW rotate&crop\IMG_0041_result_result.JPG
ID=37 
SCALE=0.024272
LM=6
195.00000 743.00000
588.00000 996.00000
795.00000 747.00000
691.00000 548.00000
464.00000 622.00000
418.00000 787.00000
IMAGE=C:\Users\Will\Desktop\Salmon photos - analysis\Edited photos\YC2 1SW rotate&crop\IMG_0042_result_result.JPG
ID=40 
SCALE=0.025641
LM=6
514.00000 825.00000
884.00000 990.00000
1079.00000 748.00000
930.00000 571.00000
760.00000 664.00000
743.00000 817.00000
IMAGE=C:\Users\Will\Desktop\Salmon photos - analysis\Edited photos\YC2 1SW rotate&crop\IMG_0045_result_result.JPG
ID=41 
SCALE=0.024032
LM=6
1052.00000 879.00000
1283.00000 940.00000
1345.00000 796.00000
1259.00000 710.00000
1149.00000 788.00000
1159.00000 870.00000
IMAGE=C:\Users\Will\Desktop\Salmon photos - analysis\Edited photos\YC2 1SW rotate&crop\IMG_0046_result_result.JPG
ID=42 
SCALE=0.024150
LM=6
1145.00000 874.00000
1397.00000 981.00000
1500.00000 843.00000
1393.00000 752.00000
1288.00000 797.00000
1272.00000 886.00000
IMAGE=C:\Users\Will\Desktop\Salmon photos - analysis\Edited photos\YC2 1SW rotate&crop\IMG_0049_result_result.JPG
ID=43 
SCALE=0.023803
LM=6
354.00000 621.00000
604.00000 718.00000
715.00000 549.00000
620.00000 420.00000
480.00000 500.00000
477.00000 606.00000
IMAGE=C:\Users\Will\Desktop\Salmon photos - analysis\Edited photos\YC2 1SW rotate&crop\IMG_2120_result_result.JPG
ID=45 
SCALE=0.030483
LM=6
340.00000 658.00000
665.00000 787.00000
777.00000 622.00000
673.00000 437.00000
527.00000 533.00000
507.00000 651.00000
IMAGE=C:\Users\Will\Desktop\Salmon photos - analysis\Edited photos\YC2 1SW rotate&crop\IMG_2122_result_result.JPG
ID=46 
SCALE=0.030483
LM=6
335.00000 647.00000
644.00000 765.00000
771.00000 572.00000
650.00000 414.00000
489.00000 512.00000
483.00000 640.00000
IMAGE=C:\Users\Will\Desktop\Salmon photos - analysis\Edited photos\YC2 1SW rotate&crop\IMG_2123_result_result.JPG
ID=47 
SCALE=0.030112
LM=6
331.00000 622.00000
653.00000 754.00000
776.00000 539.00000
674.00000 386.00000
512.00000 484.00000
504.00000 617.00000
IMAGE=C:\Users\Will\Desktop\Salmon photos - analysis\Edited photos\YC2 1SW rotate&crop\IMG_2124_result_result.JPG
ID=48 
SCALE=0.030112
LM=6
344.00000 609.00000
595.00000 725.00000
692.00000 559.00000
594.00000 435.00000
475.00000 513.00000
465.00000 619.00000
IMAGE=C:\Users\Will\Desktop\Salmon photos - analysis\Edited photos\YC2 1SW rotate&crop\IMG_2126_result_result.JPG
ID=49 
SCALE=0.030674
LM=6
395.00000 691.00000
709.00000 815.00000
813.00000 610.00000
705.00000 459.00000
560.00000 570.00000
551.00000 691.00000
IMAGE=C:\Users\Will\Desktop\Salmon photos - analysis\Edited photos\YC2 1SW rotate&crop\IMG_2127_result_result.JPG
ID=50 
SCALE=0.030303
LM=6
349.00000 599.00000
569.00000 680.00000
649.00000 537.00000
582.00000 435.00000
452.00000 506.00000
446.00000 590.00000
IMAGE=C:\Users\Will\Desktop\Salmon photos - analysis\Edited photos\YC2 1SW rotate&crop\IMG_2129_result_result.JPG
ID=52 
SCALE=0.030303
LM=6
345.00000 610.00000
705.00000 807.00000
853.00000 574.00000
736.00000 377.00000
557.00000 485.00000
523.00000 629.00000
IMAGE=C:\Users\Will\Desktop\Salmon photos - analysis\Edited photos\YC2 1SW rotate&crop\IMG_2130_result_result.JPG
ID=53 
SCALE=0.030487
LM=6
353.00000 629.00000
708.00000 780.00000
872.00000 593.00000
754.00000 389.00000
583.00000 486.00000
551.00000 632.00000
IMAGE=C:\Users\Will\Desktop\Salmon photos - analysis\Edited photos\YC2 1SW rotate&crop\IMG_2131_result_result.JPG
ID=54 
SCALE=0.029586
LM=6
365.00000 643.00000
663.00000 767.00000
799.00000 561.00000
673.00000 411.00000
538.00000 516.00000
515.00000 639.00000
IMAGE=C:\Users\Will\Desktop\Salmon photos - analysis\Edited photos\YC2 1SW rotate&crop\IMG_2132_result_result.JPG
ID=55 
SCALE=0.030302
LM=6
340.00000 618.00000
652.00000 751.00000
765.00000 544.00000
658.00000 396.00000
502.00000 494.00000
496.00000 622.00000
IMAGE=C:\Users\Will\Desktop\Salmon photos - analysis\Edited photos\YC2 1SW rotate&crop\IMG_2133_result_result.JPG
ID=56 
SCALE=0.030120
LM=6
329.00000 632.00000
565.00000 748.00000
674.00000 588.00000
569.00000 462.00000
459.00000 534.00000
446.00000 639.00000
IMAGE=C:\Users\Will\Desktop\Salmon photos - analysis\Edited photos\YC2 1SW rotate&crop\IMG_2136_result_result.JPG
ID=57 
SCALE=0.030298
LM=6
328.00000 634.00000
572.00000 748.00000
671.00000 588.00000
571.00000 460.00000
458.00000 533.00000
449.00000 640.00000
IMAGE=C:\Users\Will\Desktop\Salmon photos - analysis\Edited photos\YC2 1SW rotate&crop\IMG_2137_result_result.JPG
ID=58 
SCALE=0.030302
LM=6
332.00000 731.00000
724.00000 864.00000
849.00000 626.00000
746.00000 465.00000
571.00000 566.00000
548.00000 709.00000
IMAGE=C:\Users\Will\Desktop\Salmon photos - analysis\Edited photos\YC2 1SW rotate&crop\IMG_2139_result_result.JPG
ID=59 
SCALE=0.030486
LM=6
821.00000 643.00000
1056.00000 740.00000
1165.00000 590.00000
1042.00000 482.00000
940.00000 551.00000
940.00000 654.00000
IMAGE=C:\Users\Will\Desktop\Salmon photos - analysis\Edited photos\YC2 1SW rotate&crop\IMG_2140_result_result.JPG
ID=60 
SCALE=0.030120
LM=6
589.00000 709.00000
888.00000 821.00000
986.00000 672.00000
868.00000 508.00000
752.00000 606.00000
732.00000 719.00000
IMAGE=C:\Users\Will\Desktop\Salmon photos - analysis\Edited photos\YC2 1SW rotate&crop\IMG_2141_result_result.JPG
ID=61 
SCALE=0.030303
LM=6
341.00000 659.00000
749.00000 811.00000
883.00000 553.00000
752.00000 404.00000
591.00000 513.00000
565.00000 652.00000
IMAGE=C:\Users\Will\Desktop\Salmon photos - analysis\Edited photos\YC2 1SW rotate&crop\IMG_2142_result_result.JPG
ID=62 
SCALE=0.030486
LM=6
343.00000 688.00000
684.00000 813.00000
798.00000 601.00000
682.00000 430.00000
507.00000 537.00000
504.00000 676.00000
IMAGE=C:\Users\Will\Desktop\Salmon photos - analysis\Edited photos\YC2 1SW rotate&crop\IMG_2143_result_result.JPG
ID=63 
SCALE=0.030112
LM=6
346.00000 685.00000
724.00000 836.00000
859.00000 637.00000
728.00000 450.00000
561.00000 550.00000
538.00000 690.00000
IMAGE=C:\Users\Will\Desktop\Salmon photos - analysis\Edited photos\YC2 1SW rotate&crop\IMG_2144_result_result.JPG
ID=64 
SCALE=0.030120
LM=6
580.00000 699.00000
877.00000 810.00000
959.00000 658.00000
839.00000 509.00000
733.00000 602.00000
723.00000 716.00000
IMAGE=C:\Users\Will\Desktop\Salmon photos - analysis\Edited photos\YC2 1SW rotate&crop\IMG_2145_result_result.JPG
ID=65 
SCALE=0.030303
LM=6
396.00000 616.00000
758.00000 797.00000
909.00000 575.00000
786.00000 384.00000
607.00000 474.00000
584.00000 642.00000
IMAGE=C:\Users\Will\Desktop\Salmon photos - analysis\Edited photos\YC2 1SW rotate&crop\IMG_2146_result_result.JPG
ID=66 
SCALE=0.030302
LM=6
337.00000 662.00000
779.00000 908.00000
975.00000 606.00000
776.00000 403.00000
600.00000 528.00000
557.00000 710.00000
IMAGE=C:\Users\Will\Desktop\Salmon photos - analysis\Edited photos\YC2 1SW rotate&crop\IMG_2148_result_result.JPG
ID=67 
SCALE=0.030673
LM=6
330.00000 655.00000
704.00000 823.00000
828.00000 584.00000
688.00000 412.00000
530.00000 533.00000
511.00000 674.00000
IMAGE=C:\Users\Will\Desktop\Salmon photos - analysis\Edited photos\YC2 1SW rotate&crop\IMG_2149_result_result.JPG
ID=68 
SCALE=0.030302
LM=6
355.00000 669.00000
735.00000 836.00000
867.00000 624.00000
675.00000 417.00000
533.00000 526.00000
542.00000 684.00000
IMAGE=C:\Users\Will\Desktop\Salmon photos - analysis\Edited photos\YC2 1SW rotate&crop\IMG_2150_result_result.JPG
ID=69 
SCALE=0.029940
LM=6
360.00000 662.00000
789.00000 824.00000
932.00000 597.00000
807.00000 395.00000
604.00000 500.00000
578.00000 647.00000
IMAGE=C:\Users\Will\Desktop\Salmon photos - analysis\Edited photos\YC2 1SW rotate&crop\IMG_2152_result_result.JPG
ID=70 
SCALE=0.030120
LM=6
395.00000 735.00000
771.00000 843.00000
861.00000 684.00000
746.00000 487.00000
587.00000 592.00000
571.00000 722.00000
IMAGE=C:\Users\Will\Desktop\Salmon photos - analysis\Edited photos\YC2 1SW rotate&crop\IMG_2153_result_result.JPG
ID=71 
SCALE=0.030302
LM=6
331.00000 611.00000
633.00000 726.00000
742.00000 520.00000
630.00000 386.00000
500.00000 472.00000
486.00000 587.00000
IMAGE=C:\Users\Will\Desktop\Salmon photos - analysis\Edited photos\YC2 1SW rotate&crop\IMG_2154_result_result.JPG
ID=72 
SCALE=0.030302
LM=6
563.00000 671.00000
822.00000 765.00000
902.00000 587.00000
802.00000 478.00000
687.00000 567.00000
682.00000 662.00000
IMAGE=C:\Users\Will\Desktop\Salmon photos - analysis\Edited photos\YC2 1SW rotate&crop\IMG_2155_result_result.JPG
ID=73 
SCALE=0.029940
LM=6
352.00000 638.00000
689.00000 800.00000
814.00000 589.00000
688.00000 407.00000
540.00000 512.00000
520.00000 649.00000
IMAGE=C:\Users\Will\Desktop\Salmon photos - analysis\Edited photos\YC2 1SW rotate&crop\IMG_2156_result_result.JPG
ID=74 
SCALE=0.029761
LM=6
465.00000 585.00000
786.00000 741.00000
902.00000 561.00000
785.00000 393.00000
651.00000 478.00000
633.00000 606.00000
IMAGE=C:\Users\Will\Desktop\Salmon photos - analysis\Edited photos\YC2 1SW rotate&crop\IMG_2157_result_result.JPG
ID=75 
SCALE=0.030479
LM=6
332.00000 658.00000
671.00000 802.00000
803.00000 586.00000
694.00000 416.00000
539.00000 513.00000
507.00000 653.00000
IMAGE=C:\Users\Will\Desktop\Salmon photos - analysis\Edited photos\YC2 1SW rotate&crop\IMG_2159_result_result.JPG
ID=77 
SCALE=0.030107
LM=6
331.00000 612.00000
676.00000 787.00000
798.00000 586.00000
698.00000 414.00000
538.00000 495.00000
509.00000 634.00000
IMAGE=C:\Users\Will\Desktop\Salmon photos - analysis\Edited photos\YC2 1SW rotate&crop\IMG_2160_result_result.JPG
ID=78 
SCALE=0.030120
LM=6
333.00000 615.00000
604.00000 734.00000
695.00000 578.00000
605.00000 443.00000
479.00000 515.00000
461.00000 617.00000
IMAGE=C:\Users\Will\Desktop\Salmon photos - analysis\Edited photos\YC2 1SW rotate&crop\IMG_2161_result_result.JPG
ID=79 
SCALE=0.030303
LM=6
403.00000 650.00000
867.00000 854.00000
1014.00000 593.00000
872.00000 381.00000
684.00000 504.00000
649.00000 673.00000
IMAGE=C:\Users\Will\Desktop\Salmon photos - analysis\Edited photos\YC2 1SW rotate&crop\IMG_2162_result_result.JPG
ID=80 
SCALE=0.030112
LM=6
419.00000 628.00000
752.00000 787.00000
955.00000 562.00000
833.00000 387.00000
674.00000 473.00000
643.00000 628.00000
IMAGE=C:\Users\Will\Desktop\Salmon photos - analysis\Edited photos\YC2 1SW rotate&crop\IMG_2163_result_result.JPG
ID=81 
SCALE=0.030298
LM=6
354.00000 684.00000
713.00000 828.00000
802.00000 606.00000
685.00000 438.00000
540.00000 544.00000
517.00000 684.00000
IMAGE=C:\Users\Will\Desktop\Salmon photos - analysis\Edited photos\YC2 1SW rotate&crop\IMG_2164_result_result.JPG
ID=82 
SCALE=0.030120
LM=6
500.00000 716.00000
849.00000 847.00000
957.00000 653.00000
846.00000 482.00000
678.00000 592.00000
673.00000 716.00000
IMAGE=C:\Users\Will\Desktop\Salmon photos - analysis\Edited photos\YC2 1SW rotate&crop\IMG_2165_result_result.JPG
ID=83 
SCALE=0.030302
LM=6
710.00000 573.00000
907.00000 659.00000
967.00000 552.00000
892.00000 452.00000
791.00000 509.00000
794.00000 581.00000
IMAGE=C:\Users\Will\Desktop\Salmon photos - analysis\Edited photos\YC2 1SW rotate&crop\IMG_2166_result_result.JPG
ID=84 
SCALE=0.029940
LM=6
340.00000 593.00000
617.00000 702.00000
750.00000 532.00000
641.00000 402.00000
509.00000 467.00000
496.00000 585.00000
IMAGE=C:\Users\Will\Desktop\Salmon photos - analysis\Edited photos\YC2 1SW rotate&crop\IMG_2167_result_result.JPG
ID=85 
SCALE=0.029938
LM=6
424.00000 656.00000
753.00000 807.00000
876.00000 618.00000
739.00000 443.00000
608.00000 552.00000
591.00000 678.00000
IMAGE=C:\Users\Will\Desktop\Salmon photos - analysis\Edited photos\YC2 1SW rotate&crop\IMG_2168_result_result.JPG
ID=86 
SCALE=0.030294
LM=6
402.00000 676.00000
700.00000 836.00000
803.00000 659.00000
716.00000 493.00000
562.00000 573.00000
526.00000 692.00000
IMAGE=C:\Users\Will\Desktop\Salmon photos - analysis\Edited photos\YC2 1SW rotate&crop\IMG_2169_result_result.JPG
ID=87 
SCALE=0.030486
LM=6
550.00000 722.00000
802.00000 832.00000
891.00000 680.00000
835.00000 554.00000
689.00000 620.00000
673.00000 723.00000
IMAGE=C:\Users\Will\Desktop\Salmon photos - analysis\Edited photos\YC2 1SW rotate&crop\IMG_2170_result_result.JPG
ID=88 
SCALE=0.030487
LM=6
642.00000 583.00000
929.00000 723.00000
1028.00000 550.00000
930.00000 414.00000
806.00000 482.00000
784.00000 598.00000
IMAGE=C:\Users\Will\Desktop\Salmon photos - analysis\Edited photos\YC2 1SW rotate&crop\IMG_2171_result_result.JPG
ID=89 
SCALE=0.030302
LM=6
500.00000 660.00000
844.00000 817.00000
963.00000 627.00000
858.00000 455.00000
708.00000 544.00000
679.00000 670.00000
IMAGE=C:\Users\Will\Desktop\Salmon photos - analysis\Edited photos\YC2 1SW rotate&crop\IMG_2172_result_result.JPG
ID=90 
SCALE=0.030674
LM=6
483.00000 582.00000
814.00000 772.00000
963.00000 563.00000
855.00000 397.00000
690.00000 480.00000
662.00000 611.00000
IMAGE=C:\Users\Will\Desktop\Salmon photos - analysis\Edited photos\YC2 1SW rotate&crop\IMG_2173_result_result.JPG
ID=91 
SCALE=0.030298
LM=6
425.00000 758.00000
701.00000 839.00000
778.00000 658.00000
662.00000 554.00000
545.00000 642.00000
541.00000 746.00000
IMAGE=C:\Users\Will\Desktop\Salmon photos - analysis\Edited photos\YC2 1SW rotate&crop\IMG_2174_result_result.JPG
ID=92 
SCALE=0.030673
LM=6
745.00000 529.00000
933.00000 632.00000
1044.00000 521.00000
967.00000 417.00000
852.00000 467.00000
842.00000 540.00000
IMAGE=C:\Users\Will\Desktop\Salmon photos - analysis\Edited photos\YC2 1SW rotate&crop\IMG_2175_result_result.JPG
ID=93 
SCALE=0.030864
LM=6
102.00000 651.00000
452.00000 805.00000
585.00000 584.00000
486.00000 421.00000
308.00000 504.00000
276.00000 637.00000
IMAGE=C:\Users\Will\Desktop\Salmon photos - analysis\Edited photos\YC2 1SW rotate&crop\IMG_2177_result_result.JPG
ID=94 
SCALE=0.030395
LM=6
737.00000 727.00000
1011.00000 843.00000
1103.00000 670.00000
990.00000 554.00000
871.00000 635.00000
862.00000 739.00000
IMAGE=C:\Users\Will\Desktop\Salmon photos - analysis\Edited photos\YC2 1SW rotate&crop\IMG_2178_result_result.JPG
ID=95 
SCALE=0.030112
LM=6
458.00000 593.00000
738.00000 720.00000
808.00000 549.00000
712.00000 437.00000
595.00000 497.00000
577.00000 603.00000
IMAGE=C:\Users\Will\Desktop\Salmon photos - analysis\Edited photos\YC2 1SW rotate&crop\IMG_2179_result_result.JPG
ID=96 
SCALE=0.030487
LM=6
427.00000 688.00000
737.00000 817.00000
838.00000 625.00000
750.00000 488.00000
598.00000 565.00000
579.00000 683.00000
IMAGE=C:\Users\Will\Desktop\Salmon photos - analysis\Edited photos\YC2 1SW rotate&crop\IMG_2180_result_result.JPG
ID=97 
SCALE=0.031054
LM=6
79.00000 703.00000
425.00000 883.00000
507.00000 649.00000
422.00000 493.00000
249.00000 582.00000
221.00000 724.00000
IMAGE=C:\Users\Will\Desktop\Salmon photos - analysis\Edited photos\YC2 1SW rotate&crop\IMG_2182_result_result.JPG
ID=99 
SCALE=0.030673
LM=6
966.00000 697.00000
1195.00000 796.00000
1259.00000 669.00000
1159.00000 572.00000
1086.00000 622.00000
1073.00000 704.00000
IMAGE=C:\Users\Will\Desktop\Salmon photos - analysis\Edited photos\YC2 1SW rotate&crop\IMG_2184_result_result.JPG
ID=100 
SCALE=0.030303
LM=6
647.00000 725.00000
988.00000 836.00000
1092.00000 622.00000
957.00000 493.00000
814.00000 600.00000
805.00000 720.00000
IMAGE=C:\Users\Will\Desktop\Salmon photos - analysis\Edited photos\YC2 1SW rotate&crop\IMG_2185_result_result.JPG
ID=101 
SCALE=0.030120
LM=6
772.00000 622.00000
1039.00000 721.00000
1115.00000 561.00000
1034.00000 455.00000
914.00000 527.00000
899.00000 622.00000
IMAGE=C:\Users\Will\Desktop\Salmon photos - analysis\Edited photos\YC2 1SW rotate&crop\IMG_2186_result_result.JPG
ID=102 
SCALE=0.030301
LM=6
670.00000 691.00000
961.00000 808.00000
1084.00000 615.00000
945.00000 460.00000
823.00000 555.00000
813.00000 679.00000
IMAGE=C:\Users\Will\Desktop\Salmon photos - analysis\Edited photos\YC2 1SW rotate&crop\IMG_2187_result_result.JPG
ID=103 
SCALE=0.030112
LM=6
613.00000 630.00000
949.00000 807.00000
1085.00000 598.00000
970.00000 440.00000
815.00000 519.00000
792.00000 655.00000
IMAGE=C:\Users\Will\Desktop\Salmon photos - analysis\Edited photos\YC2 1SW rotate&crop\IMG_2189_result_result.JPG
ID=104 
SCALE=0.030118
LM=6
710.00000 629.00000
974.00000 747.00000
1090.00000 583.00000
1007.00000 456.00000
876.00000 530.00000
856.00000 635.00000
IMAGE=C:\Users\Will\Desktop\Salmon photos - analysis\Edited photos\YC2 1SW rotate&crop\IMG_2190_result_result.JPG
ID=105 
SCALE=0.030116
LM=6
654.00000 596.00000
923.00000 717.00000
1028.00000 537.00000
913.00000 422.00000
801.00000 494.00000
792.00000 604.00000
IMAGE=C:\Users\Will\Desktop\Salmon photos - analysis\Edited photos\YC2 1SW rotate&crop\IMG_2191_result_result.JPG
ID=106 
SCALE=0.030302
LM=6
509.00000 589.00000
816.00000 722.00000
950.00000 533.00000
841.00000 384.00000
697.00000 465.00000
672.00000 586.00000
IMAGE=C:\Users\Will\Desktop\Salmon photos - analysis\Edited photos\YC2 1SW rotate&crop\IMG_2192_result_result.JPG
ID=107 
SCALE=0.029940
LM=6
622.00000 672.00000
1029.00000 840.00000
1163.00000 617.00000
1034.00000 413.00000
862.00000 520.00000
848.00000 678.00000
IMAGE=C:\Users\Will\Desktop\Salmon photos - analysis\Edited photos\YC2 1SW rotate&crop\IMG_2194_result_result.JPG
ID=108 
SCALE=0.029762
LM=6
768.00000 634.00000
1013.00000 742.00000
1114.00000 580.00000
1018.00000 470.00000
902.00000 531.00000
888.00000 631.00000
IMAGE=C:\Users\Will\Desktop\Salmon photos - analysis\Edited photos\YC2 1SW rotate&crop\IMG_2195_result_result.JPG
ID=109 
SCALE=0.030120
LM=6
550.00000 604.00000
957.00000 813.00000
1140.00000 566.00000
998.00000 354.00000
809.00000 451.00000
780.00000 618.00000
IMAGE=C:\Users\Will\Desktop\Salmon photos - analysis\Edited photos\YC2 1SW rotate&crop\IMG_2196_result_result.JPG
ID=110 
SCALE=0.029938
LM=6
788.00000 667.00000
1055.00000 759.00000
1131.00000 605.00000
1039.00000 490.00000
913.00000 565.00000
913.00000 664.00000
IMAGE=C:\Users\Will\Desktop\Salmon photos - analysis\Edited photos\YC2 1SW rotate&crop\IMG_2197_result_result.JPG
ID=111 
SCALE=0.030487
LM=6
568.00000 670.00000
933.00000 805.00000
1066.00000 585.00000
932.00000 420.00000
775.00000 519.00000
758.00000 657.00000
IMAGE=C:\Users\Will\Desktop\Salmon photos - analysis\Edited photos\YC2 1SW rotate&crop\IMG_2198_result_result.JPG
ID=112 
SCALE=0.030116
LM=6
701.00000 612.00000
954.00000 718.00000
1049.00000 546.00000
938.00000 445.00000
827.00000 508.00000
818.00000 614.00000
IMAGE=C:\Users\Will\Desktop\Salmon photos - analysis\Edited photos\YC2 1SW rotate&crop\IMG_2199_result_result.JPG
ID=113 
SCALE=0.030301
LM=6
590.00000 558.00000
946.00000 727.00000
1079.00000 498.00000
977.00000 327.00000
803.00000 419.00000
780.00000 559.00000
IMAGE=C:\Users\Will\Desktop\Salmon photos - analysis\Edited photos\YC2 1SW rotate&crop\IMG_2200_result_result.JPG
ID=114 
SCALE=0.029762
LM=6
678.00000 691.00000
918.00000 794.00000
1013.00000 649.00000
908.00000 542.00000
811.00000 604.00000
802.00000 694.00000
IMAGE=C:\Users\Will\Desktop\Salmon photos - analysis\Edited photos\YC2 1SW rotate&crop\IMG_2203_result_result.JPG
ID=115 
SCALE=0.029940
LM=6
404.00000 771.00000
696.00000 887.00000
802.00000 683.00000
694.00000 532.00000
551.00000 633.00000
553.00000 761.00000
IMAGE=C:\Users\Will\Desktop\Salmon photos - analysis\Edited photos\YC2 1SW rotate&crop\IMG_2205_result_result.JPG
ID=116 
SCALE=0.030112
LM=6
697.00000 669.00000
885.00000 774.00000
961.00000 657.00000
880.00000 570.00000
799.00000 619.00000
785.00000 692.00000
IMAGE=C:\Users\Will\Desktop\Salmon photos - analysis\Edited photos\YC2 1SW rotate&crop\IMG_2206_result_result.JPG
ID=117 
SCALE=0.030301
LM=6
467.00000 782.00000
737.00000 859.00000
816.00000 727.00000
686.00000 587.00000
585.00000 681.00000
599.00000 792.00000
IMAGE=C:\Users\Will\Desktop\Salmon photos - analysis\Edited photos\YC2 1SW rotate&crop\IMG_2207_result_result.JPG
ID=118 
SCALE=0.030638
LM=6
321.00000 804.00000
630.00000 932.00000
740.00000 731.00000
631.00000 588.00000
492.00000 680.00000
476.00000 808.00000
IMAGE=C:\Users\Will\Desktop\Salmon photos - analysis\Edited photos\YC2 1SW rotate&crop\IMG_2208_result_result.JPG
ID=119 
SCALE=0.030628
LM=6
582.00000 750.00000
771.00000 817.00000
833.00000 703.00000
761.00000 614.00000
668.00000 676.00000
666.00000 749.00000
IMAGE=C:\Users\Will\Desktop\Salmon photos - analysis\Edited photos\YC2 1SW rotate&crop\IMG_2209_result_result.JPG
ID=120 
SCALE=0.030042
LM=6
380.00000 816.00000
655.00000 887.00000
748.00000 697.00000
650.00000 584.00000
527.00000 676.00000
520.00000 787.00000
IMAGE=C:\Users\Will\Desktop\Salmon photos - analysis\Edited photos\YC2 1SW rotate&crop\IMG_2212_result_result.JPG
ID=122 
SCALE=0.030112
LM=6
744.00000 728.00000
907.00000 788.00000
984.00000 683.00000
911.00000 597.00000
834.00000 655.00000
829.00000 723.00000
IMAGE=C:\Users\Will\Desktop\Salmon photos - analysis\Edited photos\YC2 1SW rotate&crop\IMG_2213_result_result.JPG
ID=123 
SCALE=0.030605
LM=6
576.00000 682.00000
807.00000 799.00000
920.00000 652.00000
836.00000 532.00000
711.00000 590.00000
691.00000 687.00000
IMAGE=C:\Users\Will\Desktop\Salmon photos - analysis\Edited photos\YC2 1SW rotate&crop\IMG_2214_result_result.JPG
ID=124 
SCALE=0.030452
LM=6
785.00000 755.00000
964.00000 830.00000
1040.00000 728.00000
972.00000 632.00000
885.00000 683.00000
875.00000 758.00000
IMAGE=C:\Users\Will\Desktop\Salmon photos - analysis\Edited photos\YC2 1SW rotate&crop\IMG_2216_result_result.JPG
ID=125 
SCALE=0.029938
LM=6
694.00000 789.00000
947.00000 881.00000
1050.00000 738.00000
949.00000 609.00000
838.00000 677.00000
825.00000 781.00000
IMAGE=C:\Users\Will\Desktop\Salmon photos - analysis\Edited photos\YC2 1SW rotate&crop\IMG_2217_result_result.JPG
ID=126 
SCALE=0.030488
LM=6
468.00000 777.00000
766.00000 909.00000
888.00000 717.00000
759.00000 567.00000
628.00000 656.00000
616.00000 777.00000
IMAGE=C:\Users\Will\Desktop\Salmon photos - analysis\Edited photos\YC2 1SW rotate&crop\IMG_2218_result_result.JPG
ID=127 
SCALE=0.030298
LM=6
816.00000 732.00000
1067.00000 830.00000
1141.00000 697.00000
1050.00000 590.00000
941.00000 656.00000
937.00000 742.00000
IMAGE=C:\Users\Will\Desktop\Salmon photos - analysis\Edited photos\YC2 1SW rotate&crop\IMG_2219_result_result.JPG
ID=128 
SCALE=0.030107
LM=6
613.00000 668.00000
885.00000 773.00000
967.00000 617.00000
857.00000 494.00000
747.00000 564.00000
745.00000 672.00000
IMAGE=C:\Users\Will\Desktop\Salmon photos - analysis\Edited photos\YC2 1SW rotate&crop\IMG_2222_result_result.JPG
ID=130 
SCALE=0.030460
LM=6
371.00000 722.00000
711.00000 852.00000
797.00000 641.00000
680.00000 478.00000
527.00000 580.00000
521.00000 710.00000
IMAGE=C:\Users\Will\Desktop\Salmon photos - analysis\Edited photos\YC2 1SW rotate&crop\IMG_2223_result_result.JPG
ID=131 
SCALE=0.030442
LM=6
456.00000 705.00000
750.00000 816.00000
820.00000 635.00000
707.00000 527.00000
587.00000 610.00000
581.00000 713.00000
IMAGE=C:\Users\Will\Desktop\Salmon photos - analysis\Edited photos\YC2 1SW rotate&crop\IMG_2224_result_result.JPG
ID=132 
SCALE=0.030289
LM=6
526.00000 698.00000
783.00000 788.00000
868.00000 627.00000
786.00000 525.00000
660.00000 599.00000
654.00000 695.00000
IMAGE=C:\Users\Will\Desktop\Salmon photos - analysis\Edited photos\YC2 1SW rotate&crop\IMG_2225_result_result.JPG
ID=133 
SCALE=0.030479
LM=6
553.00000 662.00000
804.00000 772.00000
912.00000 606.00000
818.00000 498.00000
696.00000 568.00000
684.00000 671.00000
IMAGE=C:\Users\Will\Desktop\Salmon photos - analysis\Edited photos\YC2 1SW rotate&crop\IMG_2227_result_result.JPG
ID=134 
SCALE=0.030294
LM=6
484.00000 813.00000
801.00000 893.00000
886.00000 699.00000
766.00000 570.00000
632.00000 669.00000
626.00000 778.00000
IMAGE=C:\Users\Will\Desktop\Salmon photos - analysis\Edited photos\YC2 1SW rotate&crop\IMG_2228_result_result.JPG
ID=135 
SCALE=0.030638
LM=6
421.00000 770.00000
733.00000 867.00000
835.00000 663.00000
711.00000 554.00000
584.00000 641.00000
570.00000 756.00000
IMAGE=C:\Users\Will\Desktop\Salmon photos - analysis\Edited photos\YC2 1SW rotate&crop\IMG_2229_result_result.JPG
ID=136 
SCALE=0.030835
LM=6
441.00000 763.00000
759.00000 839.00000
848.00000 665.00000
707.00000 541.00000
579.00000 638.00000
595.00000 749.00000
IMAGE=C:\Users\Will\Desktop\Salmon photos - analysis\Edited photos\YC2 1SW rotate&crop\IMG_2230_result_result.JPG
ID=137 
SCALE=0.030835
LM=6
413.00000 693.00000
712.00000 808.00000
793.00000 646.00000
695.00000 501.00000
570.00000 574.00000
558.00000 695.00000
IMAGE=C:\Users\Will\Desktop\Salmon photos - analysis\Edited photos\YC2 1SW rotate&crop\IMG_2231_result_result.JPG
ID=138 
SCALE=0.030276
LM=6
629.00000 619.00000
873.00000 731.00000
943.00000 590.00000
872.00000 486.00000
769.00000 536.00000
744.00000 623.00000
IMAGE=C:\Users\Will\Desktop\Salmon photos - analysis\Edited photos\YC2 1SW rotate&crop\IMG_2232_result_result.JPG
ID=139 
SCALE=0.029927
LM=6
581.00000 707.00000
853.00000 823.00000
956.00000 657.00000
855.00000 526.00000
731.00000 596.00000
723.00000 712.00000
IMAGE=C:\Users\Will\Desktop\Salmon photos - analysis\Edited photos\YC2 1SW rotate&crop\IMG_2234_result_result.JPG
ID=140 
SCALE=0.030474
LM=6
627.00000 773.00000
882.00000 854.00000
966.00000 690.00000
872.00000 579.00000
750.00000 662.00000
744.00000 766.00000
IMAGE=C:\Users\Will\Desktop\Salmon photos - analysis\Edited photos\YC2 1SW rotate&crop\IMG_2235_result_result.JPG
ID=141 
SCALE=0.030107
LM=6
461.00000 713.00000
794.00000 867.00000
911.00000 668.00000
800.00000 502.00000
644.00000 601.00000
624.00000 729.00000
IMAGE=C:\Users\Will\Desktop\Salmon photos - analysis\Edited photos\YC2 1SW rotate&crop\IMG_2238_result_result.JPG
ID=142 
SCALE=0.030483
LM=6
881.00000 649.00000
1053.00000 714.00000
1097.00000 610.00000
1035.00000 553.00000
956.00000 594.00000
951.00000 650.00000
IMAGE=C:\Users\Will\Desktop\Salmon photos - analysis\Edited photos\YC2 1SW rotate&crop\IMG_2239_result_result.JPG
ID=143 
SCALE=0.030675
LM=6
208.00000 722.00000
656.00000 906.00000
782.00000 635.00000
645.00000 437.00000
475.00000 562.00000
435.00000 721.00000
IMAGE=C:\Users\Will\Desktop\Salmon photos - analysis\Edited photos\YC2 1SW rotate&crop\IMG_2240_result_result.JPG
ID=144 
SCALE=0.030660
LM=6
485.00000 640.00000
747.00000 741.00000
816.00000 584.00000
741.00000 470.00000
611.00000 541.00000
604.00000 637.00000
IMAGE=C:\Users\Will\Desktop\Salmon photos - analysis\Edited photos\YC2 1SW rotate&crop\IMG_2241_result_result.JPG
ID=145 
SCALE=0.030660
LM=6
264.00000 816.00000
747.00000 909.00000
890.00000 661.00000
727.00000 456.00000
531.00000 608.00000
522.00000 777.00000
IMAGE=C:\Users\Will\Desktop\Salmon photos - analysis\Edited photos\YC2 1SW rotate&crop\IMG_2242_result_result.JPG
ID=146 
SCALE=0.030660
LM=6
459.00000 652.00000
762.00000 789.00000
856.00000 609.00000
749.00000 475.00000
620.00000 554.00000
599.00000 667.00000
IMAGE=C:\Users\Will\Desktop\Salmon photos - analysis\Edited photos\YC2 1SW rotate&crop\IMG_2243_result_result.JPG
ID=147 
SCALE=0.030864
LM=6
141.00000 665.00000
601.00000 853.00000
728.00000 603.00000
583.00000 403.00000
411.00000 506.00000
383.00000 674.00000
IMAGE=C:\Users\Will\Desktop\Salmon photos - analysis\Edited photos\YC2 1SW rotate&crop\IMG_2244_result_result.JPG
ID=148 
SCALE=0.030864
LM=6
309.00000 686.00000
627.00000 810.00000
728.00000 634.00000
607.00000 484.00000
470.00000 577.00000
465.00000 702.00000
IMAGE=C:\Users\Will\Desktop\Salmon photos - analysis\Edited photos\YC2 1SW rotate&crop\IMG_2245_result_result.JPG
ID=149 
SCALE=0.030864
LM=6
251.00000 695.00000
633.00000 836.00000
756.00000 639.00000
621.00000 433.00000
476.00000 545.00000
448.00000 692.00000
IMAGE=C:\Users\Will\Desktop\Salmon photos - analysis\Edited photos\YC2 1SW rotate&crop\IMG_2246_result_result.JPG
ID=150 
SCALE=0.030864
LM=6
512.00000 648.00000
774.00000 765.00000
873.00000 594.00000
799.00000 483.00000
658.00000 553.00000
640.00000 658.00000
IMAGE=C:\Users\Will\Desktop\Salmon photos - analysis\Edited photos\YC2 1SW rotate&crop\IMG_2247_result_result.JPG
ID=151 
SCALE=0.030864
LM=6
287.00000 704.00000
605.00000 859.00000
736.00000 660.00000
637.00000 481.00000
472.00000 573.00000
456.00000 709.00000
IMAGE=C:\Users\Will\Desktop\Salmon photos - analysis\Edited photos\YC2 1SW rotate&crop\IMG_2248_result_result.JPG
ID=152 
SCALE=0.030864
LM=6
328.00000 681.00000
621.00000 808.00000
717.00000 640.00000
649.00000 505.00000
489.00000 580.00000
473.00000 687.00000
IMAGE=C:\Users\Will\Desktop\Salmon photos - analysis\Edited photos\YC2 1SW rotate&crop\IMG_2249_result_result.JPG
ID=153 
SCALE=0.030864
LM=6
334.00000 613.00000
632.00000 755.00000
719.00000 597.00000
623.00000 462.00000
511.00000 526.00000
484.00000 636.00000
IMAGE=C:\Users\Will\Desktop\Salmon photos - analysis\Edited photos\YC2 1SW rotate&crop\IMG_2251_result_result.JPG
ID=155 
SCALE=0.030487
LM=6
245.00000 678.00000
574.00000 821.00000
677.00000 636.00000
579.00000 474.00000
421.00000 559.00000
399.00000 686.00000
IMAGE=C:\Users\Will\Desktop\Salmon photos - analysis\Edited photos\YC2 1SW rotate&crop\IMG_2252_result_result.JPG
ID=156 
SCALE=0.030487
LM=6
150.00000 723.00000
571.00000 893.00000
680.00000 660.00000
536.00000 457.00000
372.00000 594.00000
354.00000 743.00000
IMAGE=C:\Users\Will\Desktop\Salmon photos - analysis\Edited photos\YC2 1SW rotate&crop\IMG_2253_result_result.JPG
ID=157 
SCALE=0.030487
LM=6
499.00000 708.00000
740.00000 824.00000
834.00000 690.00000
745.00000 564.00000
632.00000 629.00000
618.00000 730.00000
IMAGE=C:\Users\Will\Desktop\Salmon photos - analysis\Edited photos\YC2 1SW rotate&crop\IMG_2254_result_result.JPG
ID=158 
SCALE=0.030487
LM=6
203.00000 688.00000
635.00000 863.00000
786.00000 603.00000
657.00000 419.00000
448.00000 538.00000
429.00000 698.00000
IMAGE=C:\Users\Will\Desktop\Salmon photos - analysis\Edited photos\YC2 1SW rotate&crop\IMG_2255_result_result.JPG
ID=159 
SCALE=0.030487
LM=6
641.00000 680.00000
842.00000 751.00000
900.00000 642.00000
795.00000 562.00000
733.00000 604.00000
728.00000 678.00000
IMAGE=C:\Users\Will\Desktop\Salmon photos - analysis\Edited photos\YC2 1SW rotate&crop\IMG_2256_result_result.JPG
ID=160 
SCALE=0.030487
LM=6
411.00000 678.00000
730.00000 793.00000
844.00000 618.00000
759.00000 473.00000
608.00000 550.00000
578.00000 666.00000
IMAGE=C:\Users\Will\Desktop\Salmon photos - analysis\Edited photos\YC2 1SW rotate&crop\IMG_2257_result_result.JPG
ID=161 
SCALE=0.030487
LM=6
770.00000 666.00000
988.00000 737.00000
1055.00000 618.00000
980.00000 526.00000
886.00000 585.00000
878.00000 659.00000
IMAGE=C:\Users\Will\Desktop\Salmon photos - analysis\Edited photos\YC2 1SW rotate&crop\IMG_2259_result_result.JPG
ID=163 
SCALE=0.030487
LM=6
276.00000 736.00000
643.00000 895.00000
753.00000 684.00000
629.00000 517.00000
476.00000 630.00000
460.00000 764.00000
IMAGE=C:\Users\Will\Desktop\Salmon photos - analysis\Edited photos\YC2 1SW rotate&crop\IMG_2260_result_result.JPG
ID=164 
SCALE=0.030487
LM=6
457.00000 706.00000
779.00000 825.00000
874.00000 626.00000
771.00000 479.00000
625.00000 574.00000
618.00000 694.00000
IMAGE=C:\Users\Will\Desktop\Salmon photos - analysis\Edited photos\YC2 1SW rotate&crop\IMG_2261_result_result.JPG
ID=165 
SCALE=0.030487
LM=6
308.00000 719.00000
660.00000 847.00000
763.00000 658.00000
671.00000 498.00000
504.00000 592.00000
483.00000 725.00000
IMAGE=C:\Users\Will\Desktop\Salmon photos - analysis\Edited photos\YC2 1SW rotate&crop\IMG_2262_result_result.JPG
ID=166 
SCALE=0.030487
LM=6
160.00000 675.00000
573.00000 914.00000
710.00000 647.00000
618.00000 430.00000
403.00000 543.00000
369.00000 715.00000
IMAGE=C:\Users\Will\Desktop\Salmon photos - analysis\Edited photos\YC2 1SW rotate&crop\IMG_2263_result_result.JPG
ID=167 
SCALE=0.030487
LM=6
479.00000 753.00000
770.00000 858.00000
851.00000 668.00000
761.00000 534.00000
619.00000 631.00000
616.00000 746.00000
IMAGE=C:\Users\Will\Desktop\Salmon photos - analysis\Edited photos\YC2 1SW rotate&crop\IMG_2264_result_result.JPG
ID=168 
SCALE=0.030487
LM=6
298.00000 654.00000
672.00000 859.00000
833.00000 620.00000
692.00000 434.00000
532.00000 526.00000
495.00000 673.00000
IMAGE=C:\Users\Will\Desktop\Salmon photos - analysis\Edited photos\YC2 1SW rotate&crop\IMG_2265_result_result.JPG
ID=169 
SCALE=0.030487
LM=6
519.00000 733.00000
777.00000 839.00000
884.00000 694.00000
781.00000 552.00000
665.00000 624.00000
652.00000 730.00000
IMAGE=C:\Users\Will\Desktop\Salmon photos - analysis\Edited photos\YC2 1SW rotate&crop\IMG_2266_result_result.JPG
ID=170 
SCALE=0.030487
LM=6
151.00000 641.00000
536.00000 808.00000
672.00000 589.00000
571.00000 409.00000
382.00000 502.00000
354.00000 650.00000
IMAGE=C:\Users\Will\Desktop\Salmon photos - analysis\Edited photos\YC2 1SW rotate&crop\IMG_2267_result_result.JPG
ID=171 
SCALE=0.030487
LM=6
227.00000 724.00000
647.00000 902.00000
819.00000 609.00000
674.00000 462.00000
496.00000 564.00000
460.00000 726.00000
IMAGE=C:\Users\Will\Desktop\Salmon photos - analysis\Edited photos\YC2 1SW rotate&crop\IMG_2269_result_result.JPG
ID=173 
SCALE=0.030487
LM=6
367.00000 578.00000
610.00000 714.00000
709.00000 541.00000
641.00000 417.00000
506.00000 481.00000
485.00000 586.00000
IMAGE=C:\Users\Will\Desktop\Salmon photos - analysis\Edited photos\YC2 1SW rotate&crop\IMG_2270_result_result.JPG
ID=174 
SCALE=0.030487
LM=6
320.00000 746.00000
654.00000 864.00000
774.00000 647.00000
653.00000 499.00000
489.00000 607.00000
482.00000 732.00000
IMAGE=C:\Users\Will\Desktop\Salmon photos - analysis\Edited photos\YC2 1SW rotate&crop\IMG_2273_result_result.JPG
ID=175 
SCALE=0.030487
LM=6
366.00000 723.00000
706.00000 868.00000
829.00000 667.00000
711.00000 493.00000
546.00000 599.00000
524.00000 730.00000
IMAGE=C:\Users\Will\Desktop\Salmon photos - analysis\Edited photos\YC2 1SW rotate&crop\IMG_2275_result_result.JPG
ID=176 
SCALE=0.030487
LM=6
504.00000 631.00000
759.00000 743.00000
838.00000 595.00000
765.00000 478.00000
645.00000 545.00000
623.00000 631.00000
IMAGE=C:\Users\Will\Desktop\Salmon photos - analysis\Edited photos\YC2 1SW rotate&crop\IMG_2277_result_result.JPG
ID=178 
SCALE=0.030487
LM=6
312.00000 595.00000
729.00000 761.00000
877.00000 511.00000
759.00000 340.00000
567.00000 441.00000
546.00000 589.00000
IMAGE=C:\Users\Will\Desktop\Salmon photos - analysis\Edited photos\YC2 1SW rotate&crop\IMG_2278_result_result.JPG
ID=179 
SCALE=0.030487
LM=6
438.00000 586.00000
682.00000 707.00000
757.00000 567.00000
685.00000 461.00000
566.00000 516.00000
552.00000 607.00000
IMAGE=C:\Users\Will\Desktop\Salmon photos - analysis\Edited photos\YC2 1SW rotate&crop\IMG_2280_result_result.JPG
ID=180 
SCALE=0.030487
LM=6
419.00000 672.00000
698.00000 816.00000
800.00000 649.00000
711.00000 498.00000
569.00000 587.00000
548.00000 698.00000
IMAGE=C:\Users\Will\Desktop\Salmon photos - analysis\Edited photos\YC2 1SW rotate&crop\IMG_2281_result_result.JPG
ID=181 
SCALE=0.030487
LM=6
333.00000 692.00000
691.00000 809.00000
789.00000 599.00000
680.00000 444.00000
530.00000 536.00000
513.00000 667.00000
IMAGE=C:\Users\Will\Desktop\Salmon photos - analysis\Edited photos\YC2 1SW rotate&crop\IMG_2283_result_result.JPG
ID=183 
SCALE=0.030487
LM=6
480.00000 669.00000
763.00000 803.00000
840.00000 628.00000
755.00000 494.00000
635.00000 570.00000
612.00000 674.00000
IMAGE=C:\Users\Will\Desktop\Salmon photos - analysis\Edited photos\YC2 1SW rotate&crop\IMG_2284_result_result.JPG
ID=184 
SCALE=0.030487
LM=6
257.00000 700.00000
716.00000 877.00000
847.00000 644.00000
722.00000 456.00000
537.00000 562.00000
513.00000 724.00000
IMAGE=C:\Users\Will\Desktop\Salmon photos - analysis\Edited photos\YC2 1SW rotate&crop\IMG_2285_result_result.JPG
ID=185 
SCALE=0.030487
LM=6
374.00000 789.00000
743.00000 937.00000
890.00000 722.00000
741.00000 566.00000
578.00000 673.00000
570.00000 801.00000
IMAGE=C:\Users\Will\Desktop\Salmon photos - analysis\Edited photos\YC2 1SW rotate&crop\IMG_2287_result_result.JPG
ID=187 
SCALE=0.030487
LM=6
403.00000 681.00000
726.00000 831.00000
864.00000 649.00000
760.00000 489.00000
593.00000 566.00000
568.00000 696.00000
IMAGE=C:\Users\Will\Desktop\Salmon photos - analysis\Edited photos\YC2 1SW rotate&crop\IMG_2290_result_result.JPG
ID=188 
SCALE=0.030487
LM=6
491.00000 608.00000
731.00000 733.00000
834.00000 577.00000
744.00000 462.00000
630.00000 523.00000
606.00000 621.00000
IMAGE=C:\Users\Will\Desktop\Salmon photos - analysis\Edited photos\YC2 1SW rotate&crop\IMG_2291_result_result.JPG
ID=189 
SCALE=0.030487
LM=6
410.00000 650.00000
722.00000 800.00000
843.00000 581.00000
732.00000 461.00000
591.00000 537.00000
566.00000 658.00000
IMAGE=C:\Users\Will\Desktop\Salmon photos - analysis\Edited photos\YC2 1SW rotate&crop\IMG_2292_result_result.JPG
ID=190 
SCALE=0.030487
LM=6
684.00000 658.00000
926.00000 751.00000
1001.00000 627.00000
931.00000 521.00000
814.00000 575.00000
803.00000 665.00000
IMAGE=C:\Users\Will\Desktop\Salmon photos - analysis\Edited photos\YC2 1SW rotate&crop\IMG_2293_result_result.JPG
ID=191 
SCALE=0.030487
LM=6
291.00000 725.00000
681.00000 893.00000
805.00000 683.00000
667.00000 479.00000
506.00000 603.00000
480.00000 749.00000
IMAGE=C:\Users\Will\Desktop\Salmon photos - analysis\Edited photos\YC2 1SW rotate&crop\IMG_2294_result_result.JPG
ID=192 
SCALE=0.030487
LM=6
349.00000 779.00000
657.00000 892.00000
748.00000 691.00000
654.00000 548.00000
516.00000 646.00000
497.00000 767.00000
IMAGE=C:\Users\Will\Desktop\Salmon photos - analysis\Edited photos\YC2 1SW rotate&crop\IMG_2295_result_result.JPG
ID=193 
SCALE=0.030487
LM=6
272.00000 794.00000
661.00000 961.00000
803.00000 693.00000
663.00000 527.00000
481.00000 638.00000
460.00000 789.00000
IMAGE=C:\Users\Will\Desktop\Salmon photos - analysis\Edited photos\YC2 1SW rotate&crop\IMG_2296_result_result.JPG
ID=194 
SCALE=0.030487
LM=6
396.00000 633.00000
725.00000 812.00000
845.00000 607.00000
767.00000 466.00000
597.00000 526.00000
563.00000 653.00000
IMAGE=C:\Users\Will\Desktop\Salmon photos - analysis\Edited photos\YC2 1SW rotate&crop\IMG_2297_result_result.JPG
ID=195 
SCALE=0.030487
LM=6
261.00000 721.00000
607.00000 859.00000
735.00000 649.00000
615.00000 478.00000
436.00000 581.00000
429.00000 722.00000
IMAGE=C:\Users\Will\Desktop\Salmon photos - analysis\Edited photos\YC2 1SW rotate&crop\IMG_2298_result_result.JPG
ID=196 
SCALE=0.030487
LM=6
369.00000 690.00000
682.00000 797.00000
753.00000 636.00000
661.00000 501.00000
524.00000 590.00000
524.00000 693.00000
IMAGE=C:\Users\Will\Desktop\Salmon photos - analysis\Edited photos\YC2 1SW rotate&crop\IMG_2299_result_result.JPG
ID=197 
SCALE=0.030487
LM=6
378.00000 810.00000
739.00000 922.00000
815.00000 729.00000
711.00000 580.00000
562.00000 666.00000
549.00000 799.00000
IMAGE=C:\Users\Will\Desktop\Salmon photos - analysis\Edited photos\YC2 1SW rotate&crop\IMG_2300_result_result.JPG
ID=198 
SCALE=0.030487
LM=6
388.00000 746.00000
729.00000 884.00000
823.00000 672.00000
716.00000 518.00000
554.00000 610.00000
541.00000 746.00000
IMAGE=C:\Users\Will\Desktop\Salmon photos - analysis\Edited photos\YC2 1SW rotate&crop\IMG_2301_result_result.JPG
ID=199 
SCALE=0.030487
LM=6
639.00000 736.00000
885.00000 842.00000
966.00000 702.00000
878.00000 591.00000
766.00000 659.00000
752.00000 750.00000
IMAGE=C:\Users\Will\Desktop\Salmon photos - analysis\Edited photos\YC2 1SW rotate&crop\IMG_2302_result_result.JPG
ID=200 
SCALE=0.030487
LM=6
224.00000 685.00000
617.00000 872.00000
794.00000 648.00000
655.00000 457.00000
466.00000 539.00000
428.00000 701.00000
IMAGE=C:\Users\Will\Desktop\Salmon photos - analysis\Edited photos\YC2 1SW rotate&crop\IMG_2303_result_result.JPG
ID=201 
SCALE=0.030487
LM=6
456.00000 710.00000
758.00000 843.00000
856.00000 668.00000
754.00000 527.00000
615.00000 606.00000
593.00000 723.00000
IMAGE=C:\Users\Will\Desktop\Salmon photos - analysis\Edited photos\YC2 1SW rotate&crop\IMG_2304_result_result.JPG
ID=202 
SCALE=0.030487
LM=6
310.00000 710.00000
691.00000 864.00000
803.00000 643.00000
682.00000 473.00000
516.00000 587.00000
499.00000 716.00000
IMAGE=C:\Users\Will\Desktop\Salmon photos - analysis\Edited photos\YC2 1SW rotate&crop\IMG_2305_result_result.JPG
ID=203 
SCALE=0.030487
LM=6
189.00000 689.00000
492.00000 812.00000
600.00000 619.00000
516.00000 481.00000
349.00000 572.00000
328.00000 682.00000
IMAGE=C:\Users\Will\Desktop\Salmon photos - analysis\Edited photos\YC2 1SW rotate&crop\IMG_2307_result_result.JPG
ID=205 
SCALE=0.030487
LM=6
454.00000 795.00000
772.00000 913.00000
835.00000 727.00000
757.00000 589.00000
603.00000 678.00000
590.00000 794.00000
IMAGE=C:\Users\Will\Desktop\Salmon photos - analysis\Edited photos\YC2 1SW rotate&crop\IMG_2308_result_result.JPG
ID=206 
SCALE=0.030487
LM=6
79.00000 723.00000
536.00000 891.00000
664.00000 653.00000
551.00000 479.00000
371.00000 563.00000
327.00000 717.00000
IMAGE=C:\Users\Will\Desktop\Salmon photos - analysis\Edited photos\YC2 1SW rotate&crop\IMG_2309_result_result.JPG
ID=207 
SCALE=0.030487
LM=6
335.00000 702.00000
659.00000 847.00000
759.00000 660.00000
658.00000 506.00000
527.00000 602.00000
501.00000 718.00000
IMAGE=C:\Users\Will\Desktop\Salmon photos - analysis\Edited photos\YC2 1SW rotate&crop\IMG_2312_result_result.JPG
ID=208 
SCALE=0.030487
LM=6
548.00000 758.00000
807.00000 879.00000
896.00000 738.00000
804.00000 583.00000
676.00000 668.00000
663.00000 772.00000
IMAGE=C:\Users\Will\Desktop\Salmon photos - analysis\Edited photos\YC2 1SW rotate&crop\IMG_2313_result_result.JPG
ID=209 
SCALE=0.030487
LM=6
125.00000 702.00000
612.00000 800.00000
728.00000 578.00000
553.00000 354.00000
366.00000 521.00000
387.00000 677.00000
IMAGE=C:\Users\Will\Desktop\Salmon photos - analysis\Edited photos\YC2 1SW rotate&crop\IMG_2314_result_result.JPG
ID=210 
SCALE=0.030487
LM=6
588.00000 659.00000
813.00000 749.00000
869.00000 646.00000
788.00000 544.00000
692.00000 596.00000
686.00000 672.00000
IMAGE=C:\Users\Will\Desktop\Salmon photos - analysis\Edited photos\YC2 1SW rotate&crop\IMG_2315_result_result.JPG
ID=211 
SCALE=0.030487
LM=6
74.00000 744.00000
471.00000 892.00000
604.00000 666.00000
441.00000 465.00000
288.00000 596.00000
287.00000 746.00000
IMAGE=C:\Users\Will\Desktop\Salmon photos - analysis\Edited photos\YC2 1SW rotate&crop\IMG_2316_result_result.JPG
ID=212 
SCALE=0.030487
LM=6
374.00000 730.00000
719.00000 857.00000
837.00000 678.00000
742.00000 515.00000
573.00000 601.00000
563.00000 729.00000
IMAGE=C:\Users\Will\Desktop\Salmon photos - analysis\Edited photos\YC2 1SW rotate&crop\IMG_2317_result_result.JPG
ID=213 
SCALE=0.030487
LM=6
267.00000 719.00000
643.00000 874.00000
763.00000 663.00000
656.00000 496.00000
484.00000 589.00000
468.00000 729.00000
IMAGE=C:\Users\Will\Desktop\Salmon photos - analysis\Edited photos\YC2 1SW rotate&crop\IMG_2318_result_result.JPG
ID=214 
SCALE=0.030487
LM=6
263.00000 815.00000
707.00000 940.00000
813.00000 723.00000
687.00000 559.00000
511.00000 660.00000
500.00000 806.00000
IMAGE=C:\Users\Will\Desktop\Salmon photos - analysis\Edited photos\YC2 1SW rotate&crop\IMG_2320_result_result.JPG
ID=215 
SCALE=0.030487
LM=6
338.00000 768.00000
601.00000 846.00000
657.00000 693.00000
556.00000 593.00000
447.00000 672.00000
453.00000 761.00000
IMAGE=C:\Users\Will\Desktop\Salmon photos - analysis\Edited photos\YC2 1SW rotate&crop\IMG_2321_result_result.JPG
ID=216 
SCALE=0.030487
LM=6
330.00000 762.00000
670.00000 877.00000
774.00000 674.00000
653.00000 546.00000
518.00000 632.00000
495.00000 760.00000
IMAGE=C:\Users\Will\Desktop\Salmon photos - analysis\Edited photos\YC2 1SW rotate&crop\IMG_2322_result_result.JPG
ID=217 
SCALE=0.030487
LM=6
335.00000 713.00000
626.00000 851.00000
719.00000 682.00000
625.00000 533.00000
493.00000 623.00000
476.00000 735.00000
IMAGE=C:\Users\Will\Desktop\Salmon photos - analysis\Edited photos\YC2 1SW rotate&crop\IMG_2323_result_result.JPG
ID=218 
SCALE=0.030487
LM=6
135.00000 666.00000
508.00000 818.00000
631.00000 583.00000
496.00000 402.00000
331.00000 534.00000
316.00000 675.00000
IMAGE=C:\Users\Will\Desktop\Salmon photos - analysis\Edited photos\YC2 1SW rotate&crop\IMG_2324_result_result.JPG
ID=219 
SCALE=0.030487
LM=6
397.00000 850.00000
744.00000 962.00000
801.00000 791.00000
694.00000 627.00000
548.00000 735.00000
542.00000 855.00000
IMAGE=C:\Users\Will\Desktop\Salmon photos - analysis\Edited photos\YC2 1SW rotate&crop\IMG_2325_result_result.JPG
ID=220 
SCALE=0.030487
LM=6
659.00000 644.00000
859.00000 745.00000
933.00000 631.00000
862.00000 533.00000
765.00000 580.00000
748.00000 657.00000
IMAGE=C:\Users\Will\Desktop\Salmon photos - analysis\Edited photos\YC2 1SW rotate&crop\IMG_2326_result_result.JPG
ID=221 
SCALE=0.030487
LM=6
370.00000 656.00000
668.00000 784.00000
756.00000 599.00000
668.00000 478.00000
537.00000 555.00000
516.00000 660.00000
IMAGE=C:\Users\Will\Desktop\Salmon photos - analysis\Edited photos\YC2 1SW rotate&crop\IMG_2327_result_result.JPG
ID=222 
SCALE=0.030487
LM=6
421.00000 676.00000
715.00000 790.00000
808.00000 632.00000
726.00000 505.00000
578.00000 578.00000
567.00000 678.00000
IMAGE=C:\Users\Will\Desktop\Salmon photos - analysis\Edited photos\YC2 1SW rotate&crop\IMG_2328_result_result.JPG
ID=223 
SCALE=0.030487
LM=6
213.00000 710.00000
542.00000 859.00000
658.00000 655.00000
555.00000 482.00000
400.00000 578.00000
377.00000 706.00000
IMAGE=C:\Users\Will\Desktop\Salmon photos - analysis\Edited photos\YC2 1SW rotate&crop\IMG_2329_result_result.JPG
ID=224 
SCALE=0.030487
LM=6
479.00000 693.00000
757.00000 815.00000
858.00000 649.00000
769.00000 526.00000
650.00000 594.00000
624.00000 711.00000
IMAGE=C:\Users\Will\Desktop\Salmon photos - analysis\Edited photos\YC2 1SW rotate&crop\IMG_2330_result_result.JPG
ID=225 
SCALE=0.030487
LM=6
524.00000 706.00000
807.00000 824.00000
915.00000 660.00000
821.00000 518.00000
682.00000 601.00000
672.00000 705.00000
IMAGE=C:\Users\Will\Desktop\Salmon photos - analysis\Edited photos\YC2 1SW rotate&crop\IMG_2331_result_result.JPG
ID=226 
SCALE=0.030487
LM=6
246.00000 717.00000
623.00000 915.00000
809.00000 700.00000
681.00000 481.00000
504.00000 574.00000
467.00000 729.00000
IMAGE=C:\Users\Will\Desktop\Salmon photos - analysis\Edited photos\YC2 1SW rotate&crop\IMG_2332_result_result.JPG
ID=227 
SCALE=0.030487
LM=6
394.00000 769.00000
693.00000 875.00000
802.00000 709.00000
713.00000 567.00000
570.00000 650.00000
557.00000 765.00000
IMAGE=C:\Users\Will\Desktop\Salmon photos - analysis\Edited photos\YC2 1SW rotate&crop\IMG_2333_result_result.JPG
ID=228 
SCALE=0.030487
LM=6
338.00000 723.00000
677.00000 873.00000
771.00000 709.00000
672.00000 542.00000
536.00000 629.00000
511.00000 751.00000
IMAGE=C:\Users\Will\Desktop\Salmon photos - analysis\Edited photos\YC2 1SW rotate&crop\IMG_2334_result_result.JPG
ID=229 
SCALE=0.030487
LM=6
454.00000 684.00000
770.00000 824.00000
880.00000 665.00000
774.00000 506.00000
639.00000 581.00000
614.00000 698.00000
IMAGE=C:\Users\Will\Desktop\Salmon photos - analysis\Edited photos\YC2 1SW rotate&crop\IMG_2335_result_result.JPG
ID=230 
SCALE=0.030487
LM=6
350.00000 782.00000
678.00000 885.00000
781.00000 680.00000
674.00000 545.00000
516.00000 649.00000
510.00000 766.00000
IMAGE=C:\Users\Will\Desktop\Salmon photos - analysis\Edited photos\YC2 1SW rotate&crop\IMG_2336_result_result.JPG
ID=231 
SCALE=0.030487
LM=6
290.00000 786.00000
708.00000 915.00000
819.00000 691.00000
712.00000 521.00000
522.00000 632.00000
513.00000 777.00000
IMAGE=C:\Users\Will\Desktop\Salmon photos - analysis\Edited photos\YC2 1SW rotate&crop\IMG_2337_result_result.JPG
ID=232 
SCALE=0.030487
LM=6
446.00000 768.00000
769.00000 910.00000
882.00000 737.00000
779.00000 581.00000
648.00000 658.00000
616.00000 789.00000
IMAGE=C:\Users\Will\Desktop\Salmon photos - analysis\Edited photos\YC2 1SW rotate&crop\IMG_2338_result_result.JPG
ID=233 
SCALE=0.030487
LM=6
427.00000 753.00000
708.00000 855.00000
781.00000 691.00000
661.00000 577.00000
565.00000 651.00000
555.00000 757.00000
IMAGE=C:\Users\Will\Desktop\Salmon photos - analysis\Edited photos\YC2 1SW rotate&crop\IMG_2339_result_result.JPG
ID=234 
SCALE=0.030487
LM=6
517.00000 656.00000
801.00000 796.00000
914.00000 634.00000
850.00000 506.00000
700.00000 558.00000
671.00000 670.00000
IMAGE=C:\Users\Will\Desktop\Salmon photos - analysis\Edited photos\YC2 1SW rotate&crop\IMG_2340_result_result.JPG
ID=235 
SCALE=0.030487
LM=6
327.00000 748.00000
671.00000 901.00000
815.00000 696.00000
719.00000 527.00000
540.00000 618.00000
508.00000 755.00000
IMAGE=C:\Users\Will\Desktop\Salmon photos - analysis\Edited photos\YC2 1SW rotate&crop\IMG_2341_result_result.JPG
ID=236 
SCALE=0.030487
LM=6
796.00000 751.00000
1002.00000 803.00000
1028.00000 703.00000
968.00000 619.00000
879.00000 679.00000
881.00000 742.00000
IMAGE=C:\Users\Will\Desktop\Salmon photos - analysis\Edited photos\YC2 1SW rotate&crop\IMG_2342_result_result.JPG
ID=237 
SCALE=0.030487
LM=6
416.00000 764.00000
708.00000 902.00000
818.00000 722.00000
730.00000 582.00000
582.00000 660.00000
563.00000 783.00000
IMAGE=C:\Users\Will\Desktop\Salmon photos - analysis\Edited photos\YC2 1SW rotate&crop\IMG_2344_result_result.JPG
ID=239 
SCALE=0.030487
LM=6
496.00000 702.00000
699.00000 826.00000
792.00000 696.00000
731.00000 579.00000
606.00000 635.00000
590.00000 727.00000
IMAGE=C:\Users\Will\Desktop\Salmon photos - analysis\Edited photos\YC2 1SW rotate&crop\IMG_2345_result_result.JPG
ID=240 
SCALE=0.030487
LM=6
547.00000 746.00000
831.00000 873.00000
919.00000 720.00000
821.00000 591.00000
701.00000 661.00000
681.00000 764.00000
IMAGE=C:\Users\Will\Desktop\Salmon photos - analysis\Edited photos\YC2 1SW rotate&crop\IMG_2346_result_result.JPG
ID=241 
SCALE=0.030487
LM=6
348.00000 793.00000
655.00000 906.00000
739.00000 714.00000
652.00000 565.00000
501.00000 662.00000
486.00000 787.00000
IMAGE=C:\Users\Will\Desktop\Salmon photos - analysis\Edited photos\YC2 1SW rotate&crop\IMG_2350_result_result.JPG
ID=244 
SCALE=0.030487
LM=6
555.00000 746.00000
809.00000 848.00000
909.00000 683.00000
816.00000 585.00000
702.00000 651.00000
683.00000 743.00000
IMAGE=C:\Users\Will\Desktop\Salmon photos - analysis\Edited photos\YC2 1SW rotate&crop\IMG_2351_result_result.JPG
ID=245 
SCALE=0.030487
LM=6
339.00000 743.00000
649.00000 891.00000
768.00000 712.00000
683.00000 566.00000
531.00000 636.00000
500.00000 768.00000
IMAGE=C:\Users\Will\Desktop\Salmon photos - analysis\Edited photos\YC2 1SW rotate&crop\IMG_2352_result_result.JPG
ID=246 
SCALE=0.030487
LM=6
387.00000 856.00000
739.00000 964.00000
844.00000 721.00000
712.00000 591.00000
560.00000 697.00000
568.00000 836.00000
IMAGE=C:\Users\Will\Desktop\Salmon photos - analysis\Edited photos\YC2 1SW rotate&crop\IMG_2353_result_result.JPG
ID=247 
SCALE=0.030487
LM=6
267.00000 751.00000
628.00000 893.00000
733.00000 687.00000
633.00000 492.00000
436.00000 626.00000
445.00000 760.00000
IMAGE=C:\Users\Will\Desktop\Salmon photos - analysis\Edited photos\YC2 1SW rotate&crop\IMG_2354_result_result.JPG
ID=248 
SCALE=0.030487
LM=6
644.00000 624.00000
822.00000 713.00000
892.00000 600.00000
819.00000 517.00000
736.00000 563.00000
724.00000 632.00000
IMAGE=C:\Users\Will\Desktop\Salmon photos - analysis\Edited photos\YC2 1SW rotate&crop\IMG_2355_result_result.JPG
ID=249 
SCALE=0.030487
LM=6
442.00000 791.00000
769.00000 915.00000
852.00000 741.00000
745.00000 599.00000
612.00000 694.00000
599.00000 805.00000
IMAGE=C:\Users\Will\Desktop\Salmon photos - analysis\Edited photos\YC2 1SW rotate&crop\IMG_2359_result_result.JPG
ID=252 
SCALE=0.030487
LM=6
161.00000 634.00000
509.00000 804.00000
651.00000 580.00000
547.00000 432.00000
382.00000 500.00000
340.00000 644.00000
IMAGE=C:\Users\Will\Desktop\Salmon photos - analysis\Edited photos\YC2 1SW rotate&crop\IMG_2361_result_result.JPG
ID=253 
SCALE=0.030487
LM=6
609.00000 749.00000
837.00000 831.00000
934.00000 682.00000
839.00000 600.00000
728.00000 665.00000
725.00000 746.00000
IMAGE=C:\Users\Will\Desktop\Salmon photos - analysis\Edited photos\YC2 1SW rotate&crop\IMG_2362_result_result.JPG
ID=254 
SCALE=0.030487
LM=6
160.00000 731.00000
461.00000 866.00000
562.00000 672.00000
480.00000 518.00000
316.00000 605.00000
300.00000 725.00000
IMAGE=C:\Users\Will\Desktop\Salmon photos - analysis\Edited photos\YC2 1SW rotate&crop\IMG_2363_result_result.JPG
ID=255 
SCALE=0.030487
LM=6
423.00000 667.00000
681.00000 777.00000
780.00000 625.00000
719.00000 512.00000
576.00000 563.00000
563.00000 665.00000
IMAGE=C:\Users\Will\Desktop\Salmon photos - analysis\Edited photos\YC2 1SW rotate&crop\IMG_2364_result_result.JPG
ID=256 
SCALE=0.030487
LM=6
644.00000 723.00000
894.00000 798.00000
948.00000 667.00000
867.00000 562.00000
767.00000 628.00000
758.00000 713.00000
IMAGE=C:\Users\Will\Desktop\Salmon photos - analysis\Edited photos\YC2 1SW rotate&crop\IMG_2365_result_result.JPG
ID=257 
SCALE=0.030487
LM=6
279.00000 806.00000
616.00000 908.00000
712.00000 687.00000
610.00000 565.00000
450.00000 658.00000
443.00000 782.00000
IMAGE=C:\Users\Will\Desktop\Salmon photos - analysis\Edited photos\YC2 1SW rotate&crop\IMG_2366_result_result.JPG
ID=258 
SCALE=0.030487
LM=6
240.00000 702.00000
581.00000 851.00000
715.00000 667.00000
641.00000 520.00000
466.00000 592.00000
440.00000 714.00000
IMAGE=C:\Users\Will\Desktop\Salmon photos - analysis\Edited photos\YC2 1SW rotate&crop\IMG_2367_result_result.JPG
ID=259 
SCALE=0.030487
LM=6
572.00000 734.00000
848.00000 818.00000
928.00000 682.00000
857.00000 561.00000
727.00000 625.00000
714.00000 722.00000
IMAGE=C:\Users\Will\Desktop\Salmon photos - analysis\Edited photos\YC2 1SW rotate&crop\IMG_2368_result_result.JPG
ID=260 
SCALE=0.030487
LM=6
352.00000 760.00000
613.00000 850.00000
707.00000 669.00000
625.00000 574.00000
485.00000 644.00000
476.00000 752.00000
IMAGE=C:\Users\Will\Desktop\Salmon photos - analysis\Edited photos\YC2 1SW rotate&crop\IMG_2369_result_result.JPG
ID=261 
SCALE=0.030487
LM=6
590.00000 963.00000
1014.00000 1202.00000
1200.00000 921.00000
1076.00000 706.00000
862.00000 797.00000
806.00000 985.00000
IMAGE=C:\Users\Will\Desktop\Salmon photos - analysis\Edited photos\YC2 1SW rotate&crop\IMG_9790- FISH NR 301_result_result.JPG
ID=263 
SCALE=0.028089
LM=6
982.00000 809.00000
1319.00000 991.00000
1452.00000 813.00000
1374.00000 658.00000
1208.00000 710.00000
1184.00000 852.00000
IMAGE=C:\Users\Will\Desktop\Salmon photos - analysis\Edited photos\YC2 1SW rotate&crop\IMG_9791_result_result.JPG
ID=264 
SCALE=0.028363
LM=6
1195.00000 820.00000
1452.00000 956.00000
1563.00000 821.00000
1498.00000 696.00000
1354.00000 742.00000
1340.00000 835.00000
IMAGE=C:\Users\Will\Desktop\Salmon photos - analysis\Edited photos\YC2 1SW rotate&crop\IMG_9792_result_result.JPG
ID=265 
SCALE=0.028363
LM=6
953.00000 805.00000
1219.00000 972.00000
1326.00000 797.00000
1255.00000 668.00000
1113.00000 716.00000
1090.00000 833.00000
IMAGE=C:\Users\Will\Desktop\Salmon photos - analysis\Edited photos\YC2 1SW rotate&crop\IMG_9793_result_result.JPG
ID=266 
SCALE=0.028363
LM=6
968.00000 899.00000
1299.00000 1027.00000
1409.00000 828.00000
1318.00000 684.00000
1157.00000 758.00000
1152.00000 895.00000
IMAGE=C:\Users\Will\Desktop\Salmon photos - analysis\Edited photos\YC2 1SW rotate&crop\IMG_9794_result_result.JPG
ID=267 
SCALE=0.028363
LM=6
940.00000 835.00000
1252.00000 1046.00000
1397.00000 856.00000
1327.00000 693.00000
1144.00000 756.00000
1113.00000 878.00000
IMAGE=C:\Users\Will\Desktop\Salmon photos - analysis\Edited photos\YC2 1SW rotate&crop\IMG_9795_result_result.JPG
ID=268 
SCALE=0.028363
LM=6
961.00000 861.00000
1265.00000 991.00000
1377.00000 799.00000
1288.00000 672.00000
1128.00000 751.00000
1124.00000 879.00000
IMAGE=C:\Users\Will\Desktop\Salmon photos - analysis\Edited photos\YC2 1SW rotate&crop\IMG_9797_result_result.JPG
ID=270 
SCALE=0.028363
LM=6
903.00000 785.00000
1203.00000 986.00000
1352.00000 793.00000
1299.00000 662.00000
1124.00000 697.00000
1086.00000 826.00000
IMAGE=C:\Users\Will\Desktop\Salmon photos - analysis\Edited photos\YC2 1SW rotate&crop\IMG_9798_result_result.JPG
ID=271 
SCALE=0.028363
LM=6
800.00000 930.00000
1139.00000 1092.00000
1238.00000 838.00000
1139.00000 696.00000
971.00000 798.00000
959.00000 935.00000
IMAGE=C:\Users\Will\Desktop\Salmon photos - analysis\Edited photos\YC2 1SW rotate&crop\IMG_9799_result_result.JPG
ID=272 
SCALE=0.028363
LM=6
1154.00000 723.00000
1376.00000 956.00000
1551.00000 845.00000
1517.00000 685.00000
1352.00000 692.00000
1296.00000 800.00000
IMAGE=C:\Users\Will\Desktop\Salmon photos - analysis\Edited photos\YC2 1SW rotate&crop\IMG_9800_result_result.JPG
ID=273 
SCALE=0.028363
LM=6
847.00000 876.00000
1156.00000 1048.00000
1294.00000 858.00000
1227.00000 701.00000
1050.00000 755.00000
1020.00000 895.00000
IMAGE=C:\Users\Will\Desktop\Salmon photos - analysis\Edited photos\YC2 1SW rotate&crop\IMG_9801_result_result.JPG
ID=274 
SCALE=0.028363
LM=6
793.00000 822.00000
1034.00000 991.00000
1145.00000 765.00000
1030.00000 675.00000
909.00000 731.00000
886.00000 840.00000
IMAGE=C:\Users\Will\Desktop\Salmon photos - analysis\Edited photos\YC2 1SW rotate&crop\IMG_9802_result_result.JPG
ID=275 
SCALE=0.028363
LM=6
913.00000 890.00000
1206.00000 1011.00000
1349.00000 845.00000
1270.00000 723.00000
1107.00000 764.00000
1078.00000 882.00000
IMAGE=C:\Users\Will\Desktop\Salmon photos - analysis\Edited photos\YC2 1SW rotate&crop\IMG_9803_result_result.JPG
ID=276 
SCALE=0.028363
LM=6
694.00000 756.00000
1018.00000 1022.00000
1204.00000 822.00000
1117.00000 620.00000
912.00000 681.00000
861.00000 832.00000
IMAGE=C:\Users\Will\Desktop\Salmon photos - analysis\Edited photos\YC2 1SW rotate&crop\IMG_9804_result_result.JPG
ID=277 
SCALE=0.028363
LM=6
814.00000 995.00000
1118.00000 1140.00000
1215.00000 924.00000
1138.00000 773.00000
958.00000 866.00000
954.00000 1007.00000
IMAGE=C:\Users\Will\Desktop\Salmon photos - analysis\Edited photos\YC2 1SW rotate&crop\IMG_9806_result_result.JPG
ID=278 
SCALE=0.028363
LM=6
1045.00000 837.00000
1328.00000 1057.00000
1466.00000 905.00000
1429.00000 742.00000
1243.00000 779.00000
1203.00000 900.00000
IMAGE=C:\Users\Will\Desktop\Salmon photos - analysis\Edited photos\YC2 1SW rotate&crop\IMG_9807_result_result.JPG
ID=279 
SCALE=0.028363
LM=6
808.00000 808.00000
1180.00000 1039.00000
1365.00000 841.00000
1292.00000 634.00000
1075.00000 700.00000
1032.00000 851.00000
IMAGE=C:\Users\Will\Desktop\Salmon photos - analysis\Edited photos\YC2 1SW rotate&crop\IMG_9808_result_result.JPG
ID=280 
SCALE=0.028363
LM=6
1276.00000 873.00000
1526.00000 1002.00000
1646.00000 854.00000
1572.00000 740.00000
1426.00000 783.00000
1410.00000 889.00000
IMAGE=C:\Users\Will\Desktop\Salmon photos - analysis\Edited photos\YC2 1SW rotate&crop\IMG_9809_result_result.JPG
ID=281 
SCALE=0.028363
LM=6
805.00000 823.00000
1204.00000 1049.00000
1374.00000 848.00000
1286.00000 687.00000
1105.00000 733.00000
1061.00000 866.00000
IMAGE=C:\Users\Will\Desktop\Salmon photos - analysis\Edited photos\YC2 1SW rotate&crop\IMG_9810_result_result.JPG
ID=282 
SCALE=0.028363
LM=6
829.00000 759.00000
1183.00000 991.00000
1339.00000 761.00000
1264.00000 588.00000
1080.00000 641.00000
1031.00000 799.00000
IMAGE=C:\Users\Will\Desktop\Salmon photos - analysis\Edited photos\YC2 1SW rotate&crop\IMG_9813_result_result.JPG
ID=285 
SCALE=0.028363
LM=6
688.00000 797.00000
1039.00000 990.00000
1171.00000 780.00000
1078.00000 635.00000
886.00000 689.00000
870.00000 832.00000
IMAGE=C:\Users\Will\Desktop\Salmon photos - analysis\Edited photos\YC2 1SW rotate&crop\IMG_9814_result_result.JPG
ID=286 
SCALE=0.028363
LM=6
1018.00000 776.00000
1278.00000 955.00000
1438.00000 800.00000
1375.00000 684.00000
1205.00000 703.00000
1170.00000 810.00000
IMAGE=C:\Users\Will\Desktop\Salmon photos - analysis\Edited photos\YC2 1SW rotate&crop\IMG_9816_result_result.JPG
ID=288 
SCALE=0.028363
LM=6
954.00000 811.00000
1265.00000 987.00000
1402.00000 816.00000
1324.00000 696.00000
1175.00000 730.00000
1150.00000 851.00000
IMAGE=C:\Users\Will\Desktop\Salmon photos - analysis\Edited photos\YC2 1SW rotate&crop\IMG_9819_result_result.JPG
ID=289 
SCALE=0.028363
LM=6
932.00000 1031.00000
1279.00000 1117.00000
1358.00000 861.00000
1241.00000 755.00000
1093.00000 869.00000
1096.00000 1001.00000
IMAGE=C:\Users\Will\Desktop\Salmon photos - analysis\Edited photos\YC2 1SW rotate&crop\IMG_9820_result_result.JPG
ID=290 
SCALE=0.028363
LM=6
1128.00000 852.00000
1425.00000 1050.00000
1565.00000 910.00000
1510.00000 744.00000
1340.00000 772.00000
1304.00000 894.00000
IMAGE=C:\Users\Will\Desktop\Salmon photos - analysis\Edited photos\YC2 1SW rotate&crop\IMG_9823_result_result.JPG
ID=291 
SCALE=0.028363
LM=6
1094.00000 980.00000
1418.00000 1178.00000
1557.00000 989.00000
1493.00000 842.00000
1318.00000 894.00000
1281.00000 1017.00000
IMAGE=C:\Users\Will\Desktop\Salmon photos - analysis\Edited photos\YC2 1SW rotate&crop\IMG_9824_result_result.JPG
ID=292 
SCALE=0.028363
LM=6
911.00000 1003.00000
1233.00000 1165.00000
1357.00000 966.00000
1281.00000 820.00000
1111.00000 869.00000
1085.00000 1010.00000
IMAGE=C:\Users\Will\Desktop\Salmon photos - analysis\Edited photos\YC2 1SW rotate&crop\IMG_9825_result_result.JPG
ID=293 
SCALE=0.028363
LM=6
1133.00000 803.00000
1380.00000 963.00000
1485.00000 807.00000
1429.00000 686.00000
1288.00000 726.00000
1260.00000 823.00000
IMAGE=C:\Users\Will\Desktop\Salmon photos - analysis\Edited photos\YC2 1SW rotate&crop\IMG_9826_result_result.JPG
ID=294 
SCALE=0.028363
LM=6
928.00000 718.00000
1209.00000 973.00000
1388.00000 798.00000
1328.00000 651.00000
1158.00000 669.00000
1092.00000 790.00000
IMAGE=C:\Users\Will\Desktop\Salmon photos - analysis\Edited photos\YC2 1SW rotate&crop\IMG_9827_result_result.JPG
ID=295 
SCALE=0.028363
LM=6
1233.00000 811.00000
1471.00000 930.00000
1556.00000 781.00000
1496.00000 682.00000
1368.00000 726.00000
1347.00000 818.00000
IMAGE=C:\Users\Will\Desktop\Salmon photos - analysis\Edited photos\YC2 1SW rotate&crop\IMG_9828_result_result.JPG
ID=296 
SCALE=0.028363
LM=6
660.00000 842.00000
1079.00000 1039.00000
1223.00000 762.00000
1124.00000 607.00000
894.00000 679.00000
873.00000 858.00000
IMAGE=C:\Users\Will\Desktop\Salmon photos - analysis\Edited photos\YC2 1SW rotate&crop\IMG_9829_result_result.JPG
ID=297 
SCALE=0.028363
LM=6
783.00000 847.00000
1181.00000 1070.00000
1335.00000 864.00000
1258.00000 659.00000
1045.00000 723.00000
1015.00000 873.00000
IMAGE=C:\Users\Will\Desktop\Salmon photos - analysis\Edited photos\YC2 1SW rotate&crop\IMG_9830_result_result.JPG
ID=298 
SCALE=0.028363
LM=6
730.00000 884.00000
1090.00000 1066.00000
1228.00000 811.00000
1162.00000 709.00000
954.00000 749.00000
920.00000 885.00000
IMAGE=C:\Users\Will\Desktop\Salmon photos - analysis\Edited photos\YC2 1SW rotate&crop\IMG_9833_result_result.JPG
ID=300 
SCALE=0.028363
LM=6
806.00000 819.00000
1032.00000 994.00000
1178.00000 832.00000
1109.00000 700.00000
960.00000 748.00000
928.00000 855.00000
IMAGE=C:\Users\Will\Desktop\Salmon photos - analysis\Edited photos\YC2 1SW rotate&crop\IMG_9834_result_result.JPG
ID=301 
SCALE=0.028363
LM=6
525.00000 882.00000
1022.00000 1189.00000
1262.00000 889.00000
1144.00000 642.00000
883.00000 726.00000
838.00000 931.00000
IMAGE=C:\Users\Will\Desktop\Salmon photos - analysis\Edited photos\YC2 1SW rotate&crop\IMG_9835_result_result.JPG
ID=302 
SCALE=0.028363
LM=6
910.00000 960.00000
1227.00000 1021.00000
1321.00000 823.00000
1218.00000 717.00000
1068.00000 805.00000
1073.00000 919.00000
IMAGE=C:\Users\Will\Desktop\Salmon photos - analysis\Edited photos\YC2 1SW rotate&crop\IMG_9836_result_result.JPG
ID=303 
SCALE=0.028363
LM=6
1060.00000 935.00000
1308.00000 1023.00000
1391.00000 857.00000
1308.00000 759.00000
1182.00000 829.00000
1179.00000 932.00000
IMAGE=C:\Users\Will\Desktop\Salmon photos - analysis\Edited photos\YC2 1SW rotate&crop\IMG_9837_result_result.JPG
ID=304 
SCALE=0.028363
LM=6
635.00000 903.00000
1052.00000 1094.00000
1220.00000 838.00000
1101.00000 675.00000
902.00000 755.00000
872.00000 907.00000
IMAGE=C:\Users\Will\Desktop\Salmon photos - analysis\Edited photos\YC2 1SW rotate&crop\IMG_9838_result_result.JPG
ID=305 
SCALE=0.028363
LM=6
640.00000 897.00000
1024.00000 1072.00000
1156.00000 837.00000
1053.00000 639.00000
841.00000 733.00000
834.00000 903.00000
IMAGE=C:\Users\Will\Desktop\Salmon photos - analysis\Edited photos\YC2 1SW rotate&crop\IMG_9840_result_result.JPG
ID=306 
SCALE=0.028363
LM=6
435.00000 816.00000
681.00000 962.00000
852.00000 817.00000
775.00000 687.00000
621.00000 737.00000
603.00000 850.00000
IMAGE=C:\Users\Will\Desktop\Salmon photos - analysis\Edited photos\YC2 1SW rotate&crop\IMG_9842_result_result.JPG
ID=307 
SCALE=0.028363
LM=6
989.00000 987.00000
1261.00000 1071.00000
1364.00000 863.00000
1263.00000 771.00000
1129.00000 857.00000
1133.00000 980.00000
IMAGE=C:\Users\Will\Desktop\Salmon photos - analysis\Edited photos\YC2 1SW rotate&crop\IMG_9844_result_result.JPG
ID=309 
SCALE=0.028363
LM=6
875.00000 949.00000
1212.00000 1146.00000
1383.00000 939.00000
1278.00000 781.00000
1121.00000 839.00000
1085.00000 964.00000
IMAGE=C:\Users\Will\Desktop\Salmon photos - analysis\Edited photos\YC2 1SW rotate&crop\IMG_9845_result_result.JPG
ID=310 
SCALE=0.028363
LM=6
1253.00000 821.00000
1473.00000 920.00000
1552.00000 804.00000
1490.00000 709.00000
1383.00000 749.00000
1368.00000 842.00000
IMAGE=C:\Users\Will\Desktop\Salmon photos - analysis\Edited photos\YC2 1SW rotate&crop\IMG_9846_result_result.JPG
ID=311 
SCALE=0.028363
LM=6
737.00000 761.00000
1013.00000 993.00000
1141.00000 836.00000
1112.00000 658.00000
940.00000 693.00000
888.00000 828.00000
IMAGE=C:\Users\Will\Desktop\Salmon photos - analysis\Edited photos\YC2 1SW rotate&crop\IMG_9847_result_result.JPG
ID=312 
SCALE=0.028363
LM=6
851.00000 915.00000
1134.00000 1021.00000
1229.00000 827.00000
1143.00000 694.00000
1007.00000 784.00000
996.00000 908.00000
IMAGE=C:\Users\Will\Desktop\Salmon photos - analysis\Edited photos\YC2 1SW rotate&crop\IMG_9849_result_result.JPG
ID=313 
SCALE=0.028363
LM=6
890.00000 855.00000
1153.00000 985.00000
1253.00000 805.00000
1189.00000 682.00000
1034.00000 750.00000
1016.00000 870.00000
IMAGE=C:\Users\Will\Desktop\Salmon photos - analysis\Edited photos\YC2 1SW rotate&crop\IMG_9851_result_result.JPG
ID=315 
SCALE=0.028363
LM=6
1088.00000 788.00000
1316.00000 905.00000
1419.00000 764.00000
1358.00000 663.00000
1229.00000 699.00000
1212.00000 796.00000
IMAGE=C:\Users\Will\Desktop\Salmon photos - analysis\Edited photos\YC2 1SW rotate&crop\IMG_9852_result_result.JPG
ID=316 
SCALE=0.028363
LM=6
630.00000 899.00000
1045.00000 1078.00000
1170.00000 820.00000
1069.00000 639.00000
848.00000 757.00000
835.00000 916.00000
IMAGE=C:\Users\Will\Desktop\Salmon photos - analysis\Edited photos\YC2 1SW rotate&crop\IMG_9853_result_result.JPG
ID=317 
SCALE=0.028363
LM=6
813.00000 762.00000
1094.00000 931.00000
1235.00000 725.00000
1181.00000 587.00000
988.00000 649.00000
958.00000 774.00000
IMAGE=C:\Users\Will\Desktop\Salmon photos - analysis\Edited photos\YC2 1SW rotate&crop\IMG_9854_result_result.JPG
ID=318 
SCALE=0.028363
LM=6
955.00000 667.00000
1161.00000 890.00000
1341.00000 771.00000
1325.00000 629.00000
1154.00000 622.00000
1091.00000 713.00000
IMAGE=C:\Users\Will\Desktop\Salmon photos - analysis\Edited photos\YC2 1SW rotate&crop\IMG_9855_result_result.JPG
ID=319 
SCALE=0.028363
LM=6
1079.00000 847.00000
1344.00000 924.00000
1414.00000 773.00000
1339.00000 684.00000
1210.00000 744.00000
1209.00000 833.00000
IMAGE=C:\Users\Will\Desktop\Salmon photos - analysis\Edited photos\YC2 1SW rotate&crop\IMG_9857_result_result.JPG
ID=321 
SCALE=0.028363
LM=6
855.00000 987.00000
1210.00000 1099.00000
1276.00000 885.00000
1158.00000 734.00000
1016.00000 836.00000
1014.00000 977.00000
IMAGE=C:\Users\Will\Desktop\Salmon photos - analysis\Edited photos\YC2 1SW rotate&crop\IMG_9859_result_result.JPG
ID=322 
SCALE=0.028363
LM=6
1058.00000 986.00000
1390.00000 1058.00000
1464.00000 867.00000
1349.00000 759.00000
1220.00000 851.00000
1219.00000 960.00000
IMAGE=C:\Users\Will\Desktop\Salmon photos - analysis\Edited photos\YC2 1SW rotate&crop\IMG_9860_result_result.JPG
ID=323 
SCALE=0.028363
LM=6
638.00000 891.00000
1040.00000 1053.00000
1174.00000 809.00000
1070.00000 656.00000
883.00000 734.00000
859.00000 891.00000
IMAGE=C:\Users\Will\Desktop\Salmon photos - analysis\Edited photos\YC2 1SW rotate&crop\IMG_9861_result_result.JPG
ID=324 
SCALE=0.028363
LM=6
522.00000 821.00000
914.00000 1000.00000
1037.00000 795.00000
950.00000 631.00000
760.00000 692.00000
734.00000 834.00000
IMAGE=C:\Users\Will\Desktop\Salmon photos - analysis\Edited photos\YC2 1SW rotate&crop\IMG_9862_result_result.JPG
ID=325 
SCALE=0.028363
LM=6
745.00000 889.00000
1122.00000 1110.00000
1311.00000 887.00000
1220.00000 695.00000
1011.00000 750.00000
964.00000 901.00000
IMAGE=C:\Users\Will\Desktop\Salmon photos - analysis\Edited photos\YC2 1SW rotate&crop\IMG_9864_result_result.JPG
ID=326 
SCALE=0.028363
LM=6
896.00000 839.00000
1181.00000 973.00000
1293.00000 801.00000
1210.00000 667.00000
1060.00000 730.00000
1047.00000 847.00000
IMAGE=C:\Users\Will\Desktop\Salmon photos - analysis\Edited photos\YC2 1SW rotate&crop\IMG_9865_result_result.JPG
ID=327 
SCALE=0.028363
LM=6
934.00000 858.00000
1209.00000 1060.00000
1362.00000 885.00000
1286.00000 737.00000
1129.00000 779.00000
1085.00000 898.00000
IMAGE=C:\Users\Will\Desktop\Salmon photos - analysis\Edited photos\YC2 1SW rotate&crop\IMG_9867_result_result.JPG
ID=328 
SCALE=0.028363
LM=6
855.00000 785.00000
1127.00000 942.00000
1240.00000 794.00000
1181.00000 641.00000
1022.00000 693.00000
998.00000 809.00000
IMAGE=C:\Users\Will\Desktop\Salmon photos - analysis\Edited photos\YC2 1SW rotate&crop\IMG_9868_result_result.JPG
ID=329 
SCALE=0.028363
LM=6
1269.00000 867.00000
1449.00000 960.00000
1512.00000 856.00000
1441.00000 777.00000
1360.00000 814.00000
1345.00000 881.00000
IMAGE=C:\Users\Will\Desktop\Salmon photos - analysis\Edited photos\YC2 1SW rotate&crop\IMG_9869_result_result.JPG
ID=330 
SCALE=0.028363
LM=6
464.00000 799.00000
999.00000 1135.00000
1189.00000 863.00000
1075.00000 583.00000
844.00000 684.00000
748.00000 861.00000
IMAGE=C:\Users\Will\Desktop\Salmon photos - analysis\Edited photos\YC2 1SW rotate&crop\IMG_9870_result_result.JPG
ID=331 
SCALE=0.028363
LM=6
832.00000 868.00000
1086.00000 981.00000
1180.00000 796.00000
1127.00000 669.00000
972.00000 742.00000
956.00000 852.00000
IMAGE=C:\Users\Will\Desktop\Salmon photos - analysis\Edited photos\YC2 1SW rotate&crop\IMG_9871_result_result.JPG
ID=332 
SCALE=0.028363
LM=6
677.00000 959.00000
1061.00000 1120.00000
1168.00000 898.00000
1088.00000 719.00000
877.00000 809.00000
862.00000 958.00000
IMAGE=C:\Users\Will\Desktop\Salmon photos - analysis\Edited photos\YC2 1SW rotate&crop\IMG_9872_result_result.JPG
ID=333 
SCALE=0.028363
LM=6
1233.00000 875.00000
1484.00000 982.00000
1590.00000 847.00000
1531.00000 726.00000
1378.00000 777.00000
1371.00000 879.00000
IMAGE=C:\Users\Will\Desktop\Salmon photos - analysis\Edited photos\YC2 1SW rotate&crop\IMG_9873_result_result.JPG
ID=334 
SCALE=0.028363
LM=6
549.00000 961.00000
1011.00000 1085.00000
1138.00000 832.00000
1015.00000 667.00000
818.00000 755.00000
795.00000 911.00000
IMAGE=C:\Users\Will\Desktop\Salmon photos - analysis\Edited photos\YC2 1SW rotate&crop\IMG_9874_result_result.JPG
ID=335 
SCALE=0.028363
LM=6
809.00000 1023.00000
1124.00000 1072.00000
1187.00000 839.00000
1086.00000 765.00000
950.00000 856.00000
960.00000 975.00000
IMAGE=C:\Users\Will\Desktop\Salmon photos - analysis\Edited photos\YC2 1SW rotate&crop\IMG_9875_result_result.JPG
ID=336 
SCALE=0.028363
LM=6
1018.00000 922.00000
1307.00000 1018.00000
1407.00000 843.00000
1330.00000 737.00000
1181.00000 808.00000
1177.00000 912.00000
IMAGE=C:\Users\Will\Desktop\Salmon photos - analysis\Edited photos\YC2 1SW rotate&crop\IMG_9876_result_result.JPG
ID=337 
SCALE=0.028363
LM=6
943.00000 786.00000
1240.00000 922.00000
1349.00000 737.00000
1281.00000 587.00000
1102.00000 665.00000
1093.00000 790.00000
IMAGE=C:\Users\Will\Desktop\Salmon photos - analysis\Edited photos\YC2 1SW rotate&crop\IMG_9878_result_result.JPG
ID=339 
SCALE=0.028363
LM=6
703.00000 1062.00000
1180.00000 1307.00000
1373.00000 1045.00000
1223.00000 778.00000
993.00000 910.00000
965.00000 1094.00000
IMAGE=C:\Users\Will\Desktop\Salmon photos - analysis\Edited photos\YC2 1SW rotate&crop\IMG_9879_result_result.JPG
ID=340 
SCALE=0.028363
LM=6
764.00000 872.00000
1098.00000 1097.00000
1258.00000 915.00000
1189.00000 737.00000
1014.00000 774.00000
966.00000 914.00000
IMAGE=C:\Users\Will\Desktop\Salmon photos - analysis\Edited photos\YC2 1SW rotate&crop\IMG_9881_result_result.JPG
ID=341 
SCALE=0.028363
LM=6
512.00000 993.00000
938.00000 1187.00000
1049.00000 976.00000
908.00000 762.00000
725.00000 863.00000
718.00000 1025.00000
IMAGE=C:\Users\Will\Desktop\Salmon photos - analysis\Edited photos\YC2 1SW rotate&crop\IMG_9887_result_result.JPG
ID=344 
SCALE=0.028363
LM=6
635.00000 930.00000
999.00000 1065.00000
1101.00000 873.00000
999.00000 722.00000
822.00000 809.00000
823.00000 941.00000
IMAGE=C:\Users\Will\Desktop\Salmon photos - analysis\Edited photos\YC2 1SW rotate&crop\IMG_9888_result_result.JPG
ID=345 
SCALE=0.028363
LM=6
297.00000 1019.00000
724.00000 1198.00000
846.00000 982.00000
712.00000 783.00000
526.00000 887.00000
512.00000 1047.00000
IMAGE=C:\Users\Will\Desktop\Salmon photos - analysis\Edited photos\YC2 1SW rotate&crop\IMG_9889_result_result.JPG
ID=346 
SCALE=0.028363
LM=6
589.00000 951.00000
963.00000 1152.00000
1114.00000 922.00000
1047.00000 759.00000
828.00000 816.00000
800.00000 980.00000
IMAGE=C:\Users\Will\Desktop\Salmon photos - analysis\Edited photos\YC2 1SW rotate&crop\IMG_9890_result_result.JPG
ID=347 
SCALE=0.028363
LM=6
160.00000 1075.00000
726.00000 1259.00000
863.00000 921.00000
738.00000 715.00000
465.00000 846.00000
447.00000 1052.00000
IMAGE=C:\Users\Will\Desktop\Salmon photos - analysis\Edited photos\YC2 1SW rotate&crop\IMG_9891_result_result.JPG
ID=348 
SCALE=0.028363
LM=6
555.00000 1019.00000
935.00000 1169.00000
1046.00000 944.00000
949.00000 783.00000
768.00000 869.00000
754.00000 1018.00000
IMAGE=C:\Users\Will\Desktop\Salmon photos - analysis\Edited photos\YC2 1SW rotate&crop\IMG_9893_result_result.JPG
ID=349 
SCALE=0.028363
LM=6
632.00000 864.00000
942.00000 1006.00000
1075.00000 829.00000
997.00000 671.00000
820.00000 735.00000
802.00000 876.00000
IMAGE=C:\Users\Will\Desktop\Salmon photos - analysis\Edited photos\YC2 1SW rotate&crop\IMG_9894_result_result.JPG
ID=350 
SCALE=0.028363
LM=6
446.00000 963.00000
827.00000 1177.00000
999.00000 936.00000
906.00000 723.00000
695.00000 821.00000
660.00000 1004.00000
IMAGE=C:\Users\Will\Desktop\Salmon photos - analysis\Edited photos\YC2 1SW rotate&crop\IMG_9895_result_result.JPG
ID=351 
SCALE=0.028363
LM=6
439.00000 901.00000
883.00000 1116.00000
1027.00000 860.00000
908.00000 660.00000
689.00000 766.00000
670.00000 939.00000
IMAGE=C:\Users\Will\Desktop\Salmon photos - analysis\Edited photos\YC2 1SW rotate&crop\IMG_9896_result_result.JPG
ID=352 
SCALE=0.028363
LM=6
583.00000 910.00000
946.00000 1059.00000
1033.00000 853.00000
934.00000 695.00000
766.00000 783.00000
766.00000 936.00000
IMAGE=C:\Users\Will\Desktop\Salmon photos - analysis\Edited photos\YC2 1SW rotate&crop\IMG_9897_result_result.JPG
ID=353 
SCALE=0.028363
LM=6
472.00000 868.00000
881.00000 1047.00000
1003.00000 851.00000
896.00000 646.00000
705.00000 734.00000
680.00000 890.00000
IMAGE=C:\Users\Will\Desktop\Salmon photos - analysis\Edited photos\YC2 1SW rotate&crop\IMG_9898_result_result.JPG
ID=354 
SCALE=0.028363
LM=6
711.00000 897.00000
999.00000 1071.00000
1093.00000 926.00000
1017.00000 768.00000
868.00000 839.00000
851.00000 949.00000
IMAGE=C:\Users\Will\Desktop\Salmon photos - analysis\Edited photos\YC2 1SW rotate&crop\IMG_9899_result_result.JPG
ID=355 
SCALE=0.028363
LM=6
550.00000 872.00000
948.00000 1095.00000
1157.00000 743.00000
996.00000 629.00000
799.00000 723.00000
772.00000 896.00000
IMAGE=C:\Users\Will\Desktop\Salmon photos - analysis\Edited photos\YC2 1SW rotate&crop\IMG_9900_result_result.JPG
ID=356 
SCALE=0.028363
LM=6
669.00000 831.00000
991.00000 1002.00000
1115.00000 850.00000
1052.00000 662.00000
863.00000 734.00000
844.00000 858.00000
IMAGE=C:\Users\Will\Desktop\Salmon photos - analysis\Edited photos\YC2 1SW rotate&crop\IMG_9901_result_result.JPG
ID=357 
SCALE=0.028363
LM=6
532.00000 880.00000
984.00000 1150.00000
1193.00000 867.00000
1040.00000 637.00000
809.00000 750.00000
783.00000 937.00000
IMAGE=C:\Users\Will\Desktop\Salmon photos - analysis\Edited photos\YC2 1SW rotate&crop\IMG_9902_result_result.JPG
ID=358 
SCALE=0.028363
LM=6
574.00000 961.00000
980.00000 1128.00000
1136.00000 889.00000
1017.00000 682.00000
809.00000 792.00000
791.00000 947.00000
IMAGE=C:\Users\Will\Desktop\Salmon photos - analysis\Edited photos\YC2 1SW rotate&crop\IMG_9903_result_result.JPG
ID=359 
SCALE=0.028363
LM=6
633.00000 809.00000
979.00000 990.00000
1151.00000 719.00000
1068.00000 589.00000
846.00000 658.00000
816.00000 819.00000
IMAGE=C:\Users\Will\Desktop\Salmon photos - analysis\Edited photos\YC2 1SW rotate&crop\IMG_9904_result_result.JPG
ID=360 
SCALE=0.028363
LM=6
371.00000 815.00000
848.00000 1032.00000
1025.00000 799.00000
931.00000 557.00000
685.00000 636.00000
648.00000 825.00000
IMAGE=C:\Users\Will\Desktop\Salmon photos - analysis\Edited photos\YC2 1SW rotate&crop\IMG_9905_result_result.JPG
ID=361 
SCALE=0.028363
LM=6
720.00000 870.00000
1037.00000 999.00000
1149.00000 796.00000
1064.00000 679.00000
903.00000 742.00000
882.00000 865.00000
IMAGE=C:\Users\Will\Desktop\Salmon photos - analysis\Edited photos\YC2 1SW rotate&crop\IMG_9906_result_result.JPG
ID=362 
SCALE=0.028363
LM=6
694.00000 864.00000
1037.00000 1005.00000
1146.00000 788.00000
1035.00000 657.00000
854.00000 748.00000
851.00000 880.00000
IMAGE=C:\Users\Will\Desktop\Salmon photos - analysis\Edited photos\YC2 1SW rotate&crop\IMG_9907_result_result.JPG
ID=363 
SCALE=0.028363
LM=6
825.00000 817.00000
1161.00000 959.00000
1272.00000 758.00000
1175.00000 621.00000
1011.00000 685.00000
985.00000 816.00000
IMAGE=C:\Users\Will\Desktop\Salmon photos - analysis\Edited photos\YC2 1SW rotate&crop\IMG_9908_result_result.JPG
ID=364 
SCALE=0.028363
LM=6
335.00000 826.00000
808.00000 1064.00000
1050.00000 801.00000
952.00000 577.00000
674.00000 645.00000
636.00000 834.00000
IMAGE=C:\Users\Will\Desktop\Salmon photos - analysis\Edited photos\YC2 1SW rotate&crop\IMG_9911_result_result.JPG
ID=366 
SCALE=0.028363
LM=6
680.00000 875.00000
1065.00000 1036.00000
1144.00000 851.00000
1036.00000 681.00000
887.00000 765.00000
869.00000 901.00000
IMAGE=C:\Users\Will\Desktop\Salmon photos - analysis\Edited photos\YC2 1SW rotate&crop\IMG_9912_result_result.JPG
ID=367 
SCALE=0.028363
LM=6
717.00000 904.00000
1072.00000 1061.00000
1177.00000 877.00000
1067.00000 707.00000
902.00000 792.00000
890.00000 931.00000
IMAGE=C:\Users\Will\Desktop\Salmon photos - analysis\Edited photos\YC2 1SW rotate&crop\IMG_9913_result_result.JPG
ID=368 
SCALE=0.028363
LM=6
411.00000 819.00000
842.00000 1088.00000
1028.00000 845.00000
950.00000 614.00000
694.00000 675.00000
645.00000 858.00000
IMAGE=C:\Users\Will\Desktop\Salmon photos - analysis\Edited photos\YC2 1SW rotate&crop\IMG_9914_result_result.JPG
ID=369 
SCALE=0.028363
LM=6
352.00000 923.00000
766.00000 1137.00000
951.00000 802.00000
828.00000 626.00000
585.00000 727.00000
562.00000 929.00000
IMAGE=C:\Users\Will\Desktop\Salmon photos - analysis\Edited photos\YC2 1SW rotate&crop\IMG_9915_result_result.JPG
ID=370 
SCALE=0.028363
LM=6
674.00000 838.00000
987.00000 1022.00000
1139.00000 821.00000
1069.00000 685.00000
890.00000 721.00000
853.00000 859.00000
IMAGE=C:\Users\Will\Desktop\Salmon photos - analysis\Edited photos\YC2 1SW rotate&crop\IMG_9917_result_result.JPG
ID=372 
SCALE=0.028363
LM=6
765.00000 871.00000
1149.00000 1037.00000
1258.00000 824.00000
1137.00000 650.00000
985.00000 738.00000
967.00000 890.00000
IMAGE=C:\Users\Will\Desktop\Salmon photos - analysis\Edited photos\YC2 1SW rotate&crop\IMG_9918_result_result.JPG
ID=373 
SCALE=0.028363
LM=6
559.00000 869.00000
880.00000 1043.00000
1015.00000 835.00000
923.00000 667.00000
750.00000 738.00000
725.00000 887.00000
IMAGE=C:\Users\Will\Desktop\Salmon photos - analysis\Edited photos\YC2 1SW rotate&crop\IMG_9919_result_result.JPG
ID=374 
SCALE=0.028363
LM=6
684.00000 774.00000
995.00000 964.00000
1154.00000 758.00000
1078.00000 612.00000
878.00000 656.00000
852.00000 802.00000
IMAGE=C:\Users\Will\Desktop\Salmon photos - analysis\Edited photos\YC2 1SW rotate&crop\IMG_9920_result_result.JPG
ID=375 
SCALE=0.028363
LM=6
728.00000 797.00000
1073.00000 981.00000
1208.00000 775.00000
1114.00000 613.00000
943.00000 681.00000
905.00000 823.00000
IMAGE=C:\Users\Will\Desktop\Salmon photos - analysis\Edited photos\YC2 1SW rotate&crop\IMG_9921_result_result.JPG
ID=376 
SCALE=0.028363
LM=6
948.00000 867.00000
1236.00000 1003.00000
1346.00000 852.00000
1270.00000 720.00000
1119.00000 774.00000
1103.00000 889.00000
IMAGE=C:\Users\Will\Desktop\Salmon photos - analysis\Edited photos\YC2 1SW rotate&crop\IMG_9922_result_result.JPG
ID=377 
SCALE=0.028363
LM=6
896.00000 841.00000
1142.00000 1001.00000
1254.00000 851.00000
1177.00000 724.00000
1049.00000 766.00000
1020.00000 873.00000
IMAGE=C:\Users\Will\Desktop\Salmon photos - analysis\Edited photos\YC2 1SW rotate&crop\IMG_9923_result_result.JPG
ID=378 
SCALE=0.028363
LM=6
649.00000 825.00000
1039.00000 979.00000
1187.00000 723.00000
1077.00000 559.00000
876.00000 654.00000
854.00000 800.00000
IMAGE=C:\Users\Will\Desktop\Salmon photos - analysis\Edited photos\YC2 1SW rotate&crop\IMG_9924_result_result.JPG
ID=379 
SCALE=0.028363
LM=6
516.00000 829.00000
937.00000 1056.00000
1097.00000 821.00000
1007.00000 609.00000
783.00000 687.00000
751.00000 851.00000
IMAGE=C:\Users\Will\Desktop\Salmon photos - analysis\Edited photos\YC2 1SW rotate&crop\IMG_9925_result_result.JPG
ID=380 
SCALE=0.028363
LM=6
559.00000 917.00000
998.00000 1089.00000
1170.00000 845.00000
1051.00000 641.00000
815.00000 742.00000
805.00000 903.00000
IMAGE=C:\Users\Will\Desktop\Salmon photos - analysis\Edited photos\YC2 1SW rotate&crop\IMG_9926_result_result.JPG
ID=381 
SCALE=0.028363
LM=6
330.00000 828.00000
766.00000 999.00000
882.00000 750.00000
781.00000 561.00000
568.00000 664.00000
545.00000 833.00000
IMAGE=C:\Users\Will\Desktop\Salmon photos - analysis\Edited photos\YC2 1SW rotate&crop\IMG_9927_result_result.JPG
ID=382 
SCALE=0.028363
LM=6
888.00000 925.00000
1192.00000 1024.00000
1264.00000 849.00000
1184.00000 708.00000
1029.00000 790.00000
1031.00000 928.00000
IMAGE=C:\Users\Will\Desktop\Salmon photos - analysis\Edited photos\YC2 1SW rotate&crop\IMG_9928_result_result.JPG
ID=383 
SCALE=0.028363
LM=6
362.00000 845.00000
867.00000 1071.00000
1037.00000 752.00000
901.00000 518.00000
623.00000 639.00000
617.00000 847.00000
IMAGE=C:\Users\Will\Desktop\Salmon photos - analysis\Edited photos\YC2 1SW rotate&crop\IMG_9929_result_result.JPG
ID=384 
SCALE=0.028363
LM=6
603.00000 901.00000
920.00000 984.00000
1007.00000 799.00000
902.00000 658.00000
748.00000 753.00000
753.00000 888.00000
IMAGE=C:\Users\Will\Desktop\Salmon photos - analysis\Edited photos\YC2 1SW rotate&crop\IMG_9931_result_result.JPG
ID=385 
SCALE=0.028363
LM=6
557.00000 924.00000
874.00000 1101.00000
1030.00000 862.00000
930.00000 719.00000
736.00000 793.00000
718.00000 939.00000
IMAGE=C:\Users\Will\Desktop\Salmon photos - analysis\Edited photos\YC2 1SW rotate&crop\IMG_9932_result_result.JPG
ID=386 
SCALE=0.028363
LM=6
709.00000 781.00000
1001.00000 941.00000
1117.00000 791.00000
1061.00000 638.00000
879.00000 684.00000
857.00000 807.00000
IMAGE=C:\Users\Will\Desktop\Salmon photos - analysis\Edited photos\YC2 1SW rotate&crop\IMG_9933_result_result.JPG
ID=387 
SCALE=0.028363
LM=6
404.00000 1044.00000
795.00000 1093.00000
844.00000 867.00000
710.00000 725.00000
548.00000 848.00000
577.00000 993.00000
IMAGE=C:\Users\Will\Desktop\Salmon photos - analysis\Edited photos\YC2 1SW rotate&crop\IMG_9934_result_result.JPG
ID=388 
SCALE=0.028363
LM=6
851.00000 831.00000
1118.00000 931.00000
1206.00000 754.00000
1132.00000 666.00000
994.00000 731.00000
988.00000 827.00000
IMAGE=C:\Users\Will\Desktop\Salmon photos - analysis\Edited photos\YC2 1SW rotate&crop\IMG_9936_result_result.JPG
ID=390 
SCALE=0.028363
LM=6
259.00000 871.00000
642.00000 1077.00000
759.00000 768.00000
675.00000 656.00000
469.00000 741.00000
447.00000 893.00000
IMAGE=C:\Users\Will\Desktop\Salmon photos - analysis\Edited photos\YC2 1SW rotate&crop\IMG_9937_result_result.JPG
ID=391 
SCALE=0.028363
LM=6
614.00000 671.00000
974.00000 950.00000
1135.00000 737.00000
1058.00000 528.00000
856.00000 589.00000
799.00000 742.00000
IMAGE=C:\Users\Will\Desktop\Salmon photos - analysis\Edited photos\YC2 1SW rotate&crop\IMG_9938_result_result.JPG
ID=392 
SCALE=0.028363
LM=6
400.00000 818.00000
876.00000 1113.00000
1111.00000 856.00000
989.00000 580.00000
748.00000 667.00000
668.00000 863.00000
IMAGE=C:\Users\Will\Desktop\Salmon photos - analysis\Edited photos\YC2 1SW rotate&crop\IMG_9939_result_result.JPG
ID=393 
SCALE=0.028363
LM=6
381.00000 918.00000
823.00000 1086.00000
975.00000 855.00000
851.00000 651.00000
633.00000 739.00000
605.00000 905.00000
IMAGE=C:\Users\Will\Desktop\Salmon photos - analysis\Edited photos\YC2 1SW rotate&crop\IMG_9941_result_result.JPG
ID=394 
SCALE=0.028363
LM=6
277.00000 846.00000
760.00000 1116.00000
943.00000 792.00000
861.00000 595.00000
572.00000 678.00000
541.00000 876.00000
IMAGE=C:\Users\Will\Desktop\Salmon photos - analysis\Edited photos\YC2 1SW rotate&crop\IMG_9942_result_result.JPG
ID=395 
SCALE=0.028363
LM=6
289.00000 1070.00000
947.00000 1209.00000
1084.00000 792.00000
915.00000 593.00000
660.00000 771.00000
635.00000 997.00000
IMAGE=C:\Users\Will\Desktop\Salmon photos - analysis\Edited photos\YC2 1SW rotate&crop\IMG_9943_result_result.JPG
ID=396 
SCALE=0.028363
LM=6
299.00000 910.00000
859.00000 1196.00000
1047.00000 781.00000
863.00000 578.00000
634.00000 717.00000
597.00000 952.00000
IMAGE=C:\Users\Will\Desktop\Salmon photos - analysis\Edited photos\YC2 1SW rotate&crop\IMG_9944_result_result.JPG
ID=397 
SCALE=0.028363
LM=6
289.00000 794.00000
750.00000 1028.00000
895.00000 754.00000
776.00000 568.00000
573.00000 648.00000
527.00000 836.00000
IMAGE=C:\Users\Will\Desktop\Salmon photos - analysis\Edited photos\YC2 1SW rotate&crop\IMG_9945_result_result.JPG
ID=398 
SCALE=0.028363
LM=6
273.00000 821.00000
633.00000 991.00000
771.00000 777.00000
691.00000 629.00000
494.00000 695.00000
462.00000 830.00000
IMAGE=C:\Users\Will\Desktop\Salmon photos - analysis\Edited photos\YC2 1SW rotate&crop\IMG_9946_result_result.JPG
ID=399 
SCALE=0.028363
LM=6
382.00000 823.00000
606.00000 920.00000
675.00000 771.00000
617.00000 671.00000
492.00000 734.00000
488.00000 826.00000
IMAGE=C:\Users\Will\Desktop\Salmon photos - analysis\Edited photos\YC2 1SW rotate&crop\IMG_9947_result_result.JPG
ID=400 
SCALE=0.028363
LM=6
260.00000 860.00000
726.00000 1112.00000
956.00000 816.00000
812.00000 590.00000
553.00000 709.00000
510.00000 890.00000
IMAGE=C:\Users\Will\Desktop\Salmon photos - analysis\Edited photos\YC2 1SW rotate&crop\IMG_9948_result_result.JPG
ID=401 
SCALE=0.028363
LM=6
264.00000 858.00000
701.00000 1098.00000
861.00000 857.00000
768.00000 658.00000
524.00000 725.00000
492.00000 895.00000
IMAGE=C:\Users\Will\Desktop\Salmon photos - analysis\Edited photos\YC2 1SW rotate&crop\IMG_9949_result_result.JPG
ID=402 
SCALE=0.028363
LM=6
606.00000 772.00000
943.00000 900.00000
1058.00000 698.00000
980.00000 540.00000
776.00000 625.00000
769.00000 767.00000
IMAGE=C:\Users\Will\Desktop\Salmon photos - analysis\Edited photos\YC2 1SW rotate&crop\IMG_9950_result_result.JPG
ID=403 
SCALE=0.028363
LM=6
480.00000 777.00000
930.00000 983.00000
1093.00000 716.00000
978.00000 542.00000
767.00000 628.00000
728.00000 797.00000
IMAGE=C:\Users\Will\Desktop\Salmon photos - analysis\Edited photos\YC2 1SW rotate&crop\IMG_9951_result_result.JPG
ID=404 
SCALE=0.028363
LM=6
301.00000 873.00000
753.00000 1062.00000
947.00000 753.00000
832.00000 629.00000
576.00000 696.00000
560.00000 872.00000
IMAGE=C:\Users\Will\Desktop\Salmon photos - analysis\Edited photos\YC2 1SW rotate&crop\IMG_9952_result_result.JPG
ID=405 
SCALE=0.028363
LM=6
666.00000 712.00000
1000.00000 888.00000
1162.00000 689.00000
1088.00000 545.00000
877.00000 594.00000
854.00000 728.00000
IMAGE=C:\Users\Will\Desktop\Salmon photos - analysis\Edited photos\YC2 1SW rotate&crop\IMG_9953_result_result.JPG
ID=406 
SCALE=0.028363
LM=6
427.00000 970.00000
902.00000 1150.00000
1005.00000 877.00000
861.00000 684.00000
649.00000 808.00000
630.00000 970.00000
IMAGE=C:\Users\Will\Desktop\Salmon photos - analysis\Edited photos\YC2 1SW rotate&crop\IMG_9955_result_result.JPG
ID=407 
SCALE=0.028363
LM=6
327.00000 1001.00000
744.00000 1125.00000
864.00000 865.00000
759.00000 675.00000
539.00000 791.00000
534.00000 973.00000
IMAGE=C:\Users\Will\Desktop\Salmon photos - analysis\Edited photos\YC2 1SW rotate&crop\IMG_9956_result_result.JPG
ID=408 
SCALE=0.028363
LM=6
831.00000 710.00000
1091.00000 910.00000
1265.00000 754.00000
1216.00000 561.00000
1032.00000 621.00000
990.00000 758.00000
IMAGE=C:\Users\Will\Desktop\Salmon photos - analysis\Edited photos\YC2 1SW rotate&crop\IMG_9957_result_result.JPG
ID=409 
SCALE=0.028363
LM=6
292.00000 1016.00000
812.00000 1251.00000
1000.00000 895.00000
875.00000 703.00000
624.00000 809.00000
576.00000 1014.00000
IMAGE=C:\Users\Will\Desktop\Salmon photos - analysis\Edited photos\YC2 1SW rotate&crop\IMG_9958_result_result.JPG
ID=410 
SCALE=0.028363
LM=6
280.00000 843.00000
688.00000 1084.00000
889.00000 800.00000
786.00000 608.00000
546.00000 688.00000
505.00000 879.00000
IMAGE=C:\Users\Will\Desktop\Salmon photos - analysis\Edited photos\YC2 1SW rotate&crop\IMG_9960_result_result.JPG
ID=411 
SCALE=0.028363
LM=6
356.00000 909.00000
743.00000 1063.00000
872.00000 847.00000
766.00000 646.00000
571.00000 747.00000
557.00000 909.00000
IMAGE=C:\Users\Will\Desktop\Salmon photos - analysis\Edited photos\YC2 1SW rotate&crop\IMG_9961_result_result.JPG
ID=412 
SCALE=0.028363
LM=6
643.00000 822.00000
937.00000 967.00000
1060.00000 770.00000
987.00000 654.00000
821.00000 717.00000
800.00000 828.00000
IMAGE=C:\Users\Will\Desktop\Salmon photos - analysis\Edited photos\YC2 1SW rotate&crop\IMG_9965_result_result.JPG
ID=415 
SCALE=0.028363
LM=6
429.00000 1034.00000
819.00000 1172.00000
938.00000 899.00000
822.00000 754.00000
640.00000 847.00000
615.00000 1009.00000
IMAGE=C:\Users\Will\Desktop\Salmon photos - analysis\Edited photos\YC2 1SW rotate&crop\IMG_9966_result_result.JPG
ID=416 
SCALE=0.028363
LM=6
272.00000 844.00000
650.00000 1092.00000
862.00000 840.00000
750.00000 673.00000
548.00000 716.00000
488.00000 873.00000
IMAGE=C:\Users\Will\Desktop\Salmon photos - analysis\Edited photos\YC2 1SW rotate&crop\IMG_9968_result_result.JPG
ID=417 
SCALE=0.028363
LM=6
331.00000 815.00000
761.00000 1082.00000
954.00000 838.00000
843.00000 620.00000
641.00000 697.00000
593.00000 881.00000
IMAGE=C:\Users\Will\Desktop\Salmon photos - analysis\Edited photos\YC2 1SW rotate&crop\IMG_9969_result_result.JPG
ID=418 
SCALE=0.028363
LM=6
218.00000 1040.00000
773.00000 1247.00000
966.00000 904.00000
793.00000 663.00000
533.00000 816.00000
511.00000 1002.00000
IMAGE=C:\Users\Will\Desktop\Salmon photos - analysis\Edited photos\YC2 1SW rotate&crop\IMG_9970_result_result.JPG
ID=419 
SCALE=0.028363
LM=6
121.00000 1050.00000
547.00000 1235.00000
694.00000 921.00000
570.00000 772.00000
341.00000 869.00000
324.00000 1042.00000
IMAGE=C:\Users\Will\Desktop\Salmon photos - analysis\Edited photos\YC2 1SW rotate&crop\IMG_9971_result_result.JPG
ID=420 
SCALE=0.028363
LM=6
123.00000 1111.00000
699.00000 1324.00000
863.00000 957.00000
762.00000 765.00000
466.00000 885.00000
432.00000 1096.00000
IMAGE=C:\Users\Will\Desktop\Salmon photos - analysis\Edited photos\YC2 1SW rotate&crop\IMG_9972_result_result.JPG
ID=421 
SCALE=0.028363
LM=6
317.00000 1006.00000
709.00000 1145.00000
828.00000 895.00000
720.00000 732.00000
538.00000 829.00000
518.00000 976.00000
IMAGE=C:\Users\Will\Desktop\Salmon photos - analysis\Edited photos\YC2 1SW rotate&crop\IMG_9973_result_result.JPG
ID=422 
SCALE=0.028363
LM=6
573.00000 789.00000
891.00000 917.00000
1008.00000 702.00000
912.00000 574.00000
756.00000 641.00000
736.00000 777.00000
IMAGE=C:\Users\Will\Desktop\Salmon photos - analysis\Edited photos\YC2 1SW rotate&crop\IMG_9974_result_result.JPG
ID=423 
SCALE=0.028363
LM=6
126.00000 717.00000
589.00000 932.00000
744.00000 647.00000
642.00000 454.00000
398.00000 556.00000
364.00000 735.00000
IMAGE=C:\Users\Will\Desktop\Salmon photos - analysis\Edited photos\YC2 1SW rotate&crop\IMG_9976_result_result.JPG
ID=425 
SCALE=0.028363
LM=6
520.00000 959.00000
989.00000 1117.00000
1141.00000 823.00000
1009.00000 675.00000
792.00000 753.00000
773.00000 921.00000
IMAGE=C:\Users\Will\Desktop\Salmon photos - analysis\Edited photos\YC2 1SW rotate&crop\IMG_9978_result_result.JPG
ID=426 
SCALE=0.028363
LM=6
101.00000 950.00000
490.00000 1147.00000
657.00000 915.00000
568.00000 700.00000
328.00000 784.00000
305.00000 964.00000
IMAGE=C:\Users\Will\Desktop\Salmon photos - analysis\Edited photos\YC2 1SW rotate&crop\IMG_9979_result_result.JPG
ID=427 
SCALE=0.028363
LM=6
235.00000 854.00000
634.00000 1037.00000
783.00000 827.00000
716.00000 648.00000
495.00000 699.00000
465.00000 868.00000
IMAGE=C:\Users\Will\Desktop\Salmon photos - analysis\Edited photos\YC2 1SW rotate&crop\IMG_9980_result_result.JPG
ID=428 
SCALE=0.028363
LM=6
346.00000 728.00000
710.00000 921.00000
877.00000 669.00000
789.00000 502.00000
569.00000 582.00000
537.00000 745.00000
IMAGE=C:\Users\Will\Desktop\Salmon photos - analysis\Edited photos\YC2 1SW rotate&crop\IMG_9981_result_result.JPG
ID=429 
SCALE=0.028363
LM=6
460.00000 845.00000
884.00000 1074.00000
1025.00000 771.00000
926.00000 604.00000
695.00000 680.00000
661.00000 863.00000
IMAGE=C:\Users\Will\Desktop\Salmon photos - analysis\Edited photos\YC2 1SW rotate&crop\IMG_9982_result_result.JPG
ID=430 
SCALE=0.028363
LM=6
389.00000 807.00000
821.00000 989.00000
978.00000 719.00000
856.00000 571.00000
688.00000 650.00000
646.00000 795.00000
IMAGE=C:\Users\Will\Desktop\Salmon photos - analysis\Edited photos\YC2 1SW rotate&crop\IMG_9983_result_result.JPG
ID=431 
SCALE=0.028363
LM=6
164.00000 875.00000
606.00000 1100.00000
770.00000 855.00000
663.00000 673.00000
455.00000 751.00000
408.00000 912.00000
IMAGE=C:\Users\Will\Desktop\Salmon photos - analysis\Edited photos\YC2 1SW rotate&crop\IMG_9984_result_result.JPG
ID=432 
SCALE=0.028363
LM=6
62.00000 904.00000
476.00000 1038.00000
611.00000 791.00000
504.00000 639.00000
291.00000 721.00000
270.00000 868.00000
IMAGE=C:\Users\Will\Desktop\Salmon photos - analysis\Edited photos\YC2 1SW rotate&crop\IMG_9985_result_result.JPG
ID=433 
SCALE=0.028363
LM=6
82.00000 999.00000
561.00000 1240.00000
724.00000 938.00000
607.00000 736.00000
382.00000 841.00000
330.00000 1023.00000
IMAGE=C:\Users\Will\Desktop\Salmon photos - analysis\Edited photos\YC2 1SW rotate&crop\IMG_9986_result_result.JPG
ID=434 
SCALE=0.028363
LM=6
474.00000 817.00000
829.00000 1020.00000
994.00000 801.00000
899.00000 657.00000
697.00000 703.00000
659.00000 846.00000
IMAGE=C:\Users\Will\Desktop\Salmon photos - analysis\Edited photos\YC2 1SW rotate&crop\IMG_9987_result_result.JPG
ID=435 
SCALE=0.028363
LM=6
163.00000 950.00000
599.00000 1077.00000
712.00000 787.00000
595.00000 657.00000
389.00000 767.00000
378.00000 926.00000
IMAGE=C:\Users\Will\Desktop\Salmon photos - analysis\Edited photos\YC2 1SW rotate&crop\IMG_9988_result_result.JPG
ID=436 
SCALE=0.028363
LM=6
54.00000 921.00000
602.00000 1170.00000
750.00000 924.00000
598.00000 610.00000
314.00000 773.00000
323.00000 954.00000
IMAGE=C:\Users\Will\Desktop\Salmon photos - analysis\Edited photos\YC2 1SW rotate&crop\IMG_9989_result_result.JPG
ID=437 
SCALE=0.028363
LM=6
111.00000 1079.00000
682.00000 1323.00000
868.00000 998.00000
713.00000 769.00000
466.00000 897.00000
420.00000 1100.00000
IMAGE=C:\Users\Will\Desktop\Salmon photos - analysis\Edited photos\YC2 1SW rotate&crop\IMG_9990_result_result.JPG
ID=438 
SCALE=0.028363
LM=6
467.00000 941.00000
864.00000 1081.00000
996.00000 886.00000
857.00000 700.00000
693.00000 792.00000
683.00000 943.00000
IMAGE=C:\Users\Will\Desktop\Salmon photos - analysis\Edited photos\YC2 1SW rotate&crop\IMG_9992_result_result.JPG
ID=439 
SCALE=0.028363
LM=6
299.00000 738.00000
664.00000 973.00000
796.00000 769.00000
706.00000 546.00000
502.00000 622.00000
473.00000 788.00000
IMAGE=C:\Users\Will\Desktop\Salmon photos - analysis\Edited photos\YC2 1SW rotate&crop\IMG_9993_result_result.JPG
ID=440 
SCALE=0.028363
LM=6
90.00000 929.00000
514.00000 1079.00000
631.00000 795.00000
502.00000 627.00000
301.00000 744.00000
278.00000 908.00000
IMAGE=C:\Users\Will\Desktop\Salmon photos - analysis\Edited photos\YC2 1SW rotate&crop\IMG_9996_result_result.JPG
ID=441 
SCALE=0.028363
LM=6
329.00000 755.00000
693.00000 948.00000
850.00000 717.00000
766.00000 545.00000
545.00000 604.00000
508.00000 750.00000
IMAGE=C:\Users\Will\Desktop\Salmon photos - analysis\Edited photos\YC2 1SW rotate&crop\IMG_9997_result_result.JPG
ID=442 
SCALE=0.028363
LM=6
77.00000 800.00000
620.00000 1086.00000
789.00000 809.00000
662.00000 531.00000
397.00000 645.00000
351.00000 838.00000
IMAGE=C:\Users\Will\Desktop\Salmon photos - analysis\Edited photos\YC2 1SW rotate&crop\IMG_9998_result_result.JPG
ID=443 
SCALE=0.028363
LM=6
256.00000 735.00000
596.00000 983.00000
808.00000 735.00000
725.00000 575.00000
501.00000 618.00000
454.00000 782.00000
IMAGE=C:\Users\Will\Desktop\Salmon photos - analysis\Edited photos\YC2 1SW rotate&crop\IMG_9999- FISH 491 (1STH)_result_result.JPG
ID=444 
SCALE=0.028363
LM=6
842.00000 760.00000
1107.00000 883.00000
1212.00000 750.00000
1146.00000 626.00000
1021.00000 680.00000
998.00000 771.00000
IMAGE=C:\Users\Will\Dropbox\Morphology to Micorbiome (Salmo salar)\Head morphology\Salmon photos - analysis\Edited photos\YC2 2SW rotate\A3_IMG_2902_result.JPG
ID=0 
SCALE=0.034767
LM=6
870.00000 638.00000
1110.00000 771.00000
1221.00000 637.00000
1142.00000 500.00000
1023.00000 563.00000
997.00000 658.00000
IMAGE=C:\Users\Will\Dropbox\Morphology to Micorbiome (Salmo salar)\Head morphology\Salmon photos - analysis\Edited photos\YC2 2SW rotate\A4_IMG_2875_result.JPG
ID=1 
SCALE=0.034720
LM=6
842.00000 759.00000
1252.00000 928.00000
1473.00000 695.00000
1273.00000 503.00000
1119.00000 605.00000
1099.00000 756.00000
IMAGE=C:\Users\Will\Dropbox\Morphology to Micorbiome (Salmo salar)\Head morphology\Salmon photos - analysis\Edited photos\YC2 2SW rotate\A4_IMG_2933_result.JPG
ID=2 
SCALE=0.034453
LM=6
863.00000 858.00000
1216.00000 1001.00000
1328.00000 822.00000
1197.00000 654.00000
1068.00000 748.00000
1046.00000 883.00000
IMAGE=C:\Users\Will\Dropbox\Morphology to Micorbiome (Salmo salar)\Head morphology\Salmon photos - analysis\Edited photos\YC2 2SW rotate\A4_IMG_3028_result.JPG
ID=3 
SCALE=0.034483
LM=6
754.00000 689.00000
1074.00000 837.00000
1207.00000 686.00000
1123.00000 536.00000
969.00000 602.00000
947.00000 708.00000
IMAGE=C:\Users\Will\Dropbox\Morphology to Micorbiome (Salmo salar)\Head morphology\Salmon photos - analysis\Edited photos\YC2 2SW rotate\A5_IMG_2896_result.JPG
ID=4 
SCALE=0.034535
LM=6
883.00000 591.00000
1307.00000 847.00000
1504.00000 639.00000
1394.00000 432.00000
1171.00000 485.00000
1140.00000 640.00000
IMAGE=C:\Users\Will\Dropbox\Morphology to Micorbiome (Salmo salar)\Head morphology\Salmon photos - analysis\Edited photos\YC2 2SW rotate\A5_IMG_2948_result.JPG
ID=5 
SCALE=0.034310
LM=6
820.00000 739.00000
1267.00000 923.00000
1459.00000 681.00000
1270.00000 450.00000
1076.00000 596.00000
1072.00000 751.00000
IMAGE=C:\Users\Will\Dropbox\Morphology to Micorbiome (Salmo salar)\Head morphology\Salmon photos - analysis\Edited photos\YC2 2SW rotate\A5_IMG_2971_result.JPG
ID=6 
SCALE=0.034475
LM=6
662.00000 875.00000
1150.00000 1087.00000
1337.00000 852.00000
1168.00000 599.00000
953.00000 726.00000
942.00000 905.00000
IMAGE=C:\Users\Will\Dropbox\Morphology to Micorbiome (Salmo salar)\Head morphology\Salmon photos - analysis\Edited photos\YC2 2SW rotate\A5_IMG_3016_result.JPG
ID=7 
SCALE=0.034722
LM=6
889.00000 712.00000
1316.00000 928.00000
1514.00000 668.00000
1308.00000 478.00000
1141.00000 589.00000
1129.00000 747.00000
IMAGE=C:\Users\Will\Dropbox\Morphology to Micorbiome (Salmo salar)\Head morphology\Salmon photos - analysis\Edited photos\YC2 2SW rotate\A6_IMG_2939_result.JPG
ID=8 
SCALE=0.034470
LM=6
782.00000 743.00000
1210.00000 918.00000
1433.00000 713.00000
1239.00000 483.00000
1068.00000 610.00000
1049.00000 765.00000
IMAGE=C:\Users\Will\Dropbox\Morphology to Micorbiome (Salmo salar)\Head morphology\Salmon photos - analysis\Edited photos\YC2 2SW rotate\A6_IMG_2977_result.JPG
ID=9 
SCALE=0.034361
LM=6
745.00000 764.00000
1158.00000 949.00000
1357.00000 683.00000
1180.00000 527.00000
1020.00000 633.00000
992.00000 785.00000
IMAGE=C:\Users\Will\Dropbox\Morphology to Micorbiome (Salmo salar)\Head morphology\Salmon photos - analysis\Edited photos\YC2 2SW rotate\A6_IMG_2999_result.JPG
ID=10 
SCALE=0.034483
LM=6
822.00000 729.00000
1430.00000 967.00000
1766.00000 675.00000
1556.00000 387.00000
1299.00000 514.00000
1263.00000 737.00000
IMAGE=C:\Users\Will\Dropbox\Morphology to Micorbiome (Salmo salar)\Head morphology\Salmon photos - analysis\Edited photos\YC2 2SW rotate\Farm34_IMG_3113_result.JPG
ID=13 
SCALE=0.033670
LM=6
62.00000 914.00000
646.00000 1150.00000
824.00000 838.00000
601.00000 538.00000
375.00000 691.00000
363.00000 934.00000
IMAGE=C:\Users\Will\Dropbox\Morphology to Micorbiome (Salmo salar)\Head morphology\Salmon photos - analysis\Edited photos\YC2 2SW rotate\Farm46_IMG_2837_result.JPG
ID=16 
SCALE=0.036621
LM=6
76.00000 774.00000
589.00000 1029.00000
736.00000 701.00000
588.00000 425.00000
364.00000 581.00000
328.00000 791.00000
IMAGE=C:\Users\Will\Dropbox\Morphology to Micorbiome (Salmo salar)\Head morphology\Salmon photos - analysis\Edited photos\YC2 2SW rotate\Farm46_IMG_2859_result.JPG
ID=17 
SCALE=0.036618
LM=6
786.00000 748.00000
1404.00000 1040.00000
1628.00000 685.00000
1432.00000 392.00000
1188.00000 549.00000
1149.00000 766.00000
IMAGE=C:\Users\Will\Dropbox\Morphology to Micorbiome (Salmo salar)\Head morphology\Salmon photos - analysis\Edited photos\YC2 2SW rotate\Farm46_IMG_2866_result.JPG
ID=18 
SCALE=0.034357
LM=6
699.00000 681.00000
1293.00000 950.00000
1547.00000 631.00000
1342.00000 342.00000
1080.00000 488.00000
1051.00000 704.00000
IMAGE=C:\Users\Will\Dropbox\Morphology to Micorbiome (Salmo salar)\Head morphology\Salmon photos - analysis\Edited photos\YC2 2SW rotate\Farm46_IMG_2878_result.JPG
ID=19 
SCALE=0.034247
LM=6
843.00000 828.00000
1401.00000 1055.00000
1657.00000 748.00000
1435.00000 474.00000
1203.00000 623.00000
1170.00000 844.00000
IMAGE=C:\Users\Will\Dropbox\Morphology to Micorbiome (Salmo salar)\Head morphology\Salmon photos - analysis\Edited photos\YC2 2SW rotate\Farm46_IMG_2987_result.JPG
ID=20 
SCALE=0.034601
LM=6
986.00000 835.00000
1567.00000 1061.00000
1847.00000 739.00000
1614.00000 495.00000
1390.00000 617.00000
1361.00000 839.00000
IMAGE=C:\Users\Will\Dropbox\Morphology to Micorbiome (Salmo salar)\Head morphology\Salmon photos - analysis\Edited photos\YC2 2SW rotate\Farm46_IMG_3005_result.JPG
ID=21 
SCALE=0.033756
LM=6
822.00000 815.00000
1460.00000 1069.00000
1727.00000 735.00000
1456.00000 436.00000
1239.00000 591.00000
1215.00000 830.00000
IMAGE=C:\Users\Will\Dropbox\Morphology to Micorbiome (Salmo salar)\Head morphology\Salmon photos - analysis\Edited photos\YC2 2SW rotate\Farm46_IMG_3065_result.JPG
ID=22 
SCALE=0.033784
LM=6
773.00000 792.00000
1373.00000 984.00000
1622.00000 756.00000
1405.00000 399.00000
1137.00000 544.00000
1119.00000 762.00000
IMAGE=C:\Users\Will\Dropbox\Morphology to Micorbiome (Salmo salar)\Head morphology\Salmon photos - analysis\Edited photos\YC2 2SW rotate\Farm50_IMG_3002_result.JPG
ID=23 
SCALE=0.034483
LM=6
838.00000 920.00000
1479.00000 1103.00000
1730.00000 757.00000
1407.00000 469.00000
1197.00000 674.00000
1215.00000 899.00000
IMAGE=C:\Users\Will\Dropbox\Morphology to Micorbiome (Salmo salar)\Head morphology\Salmon photos - analysis\Edited photos\YC2 2SW rotate\Farm50_IMG_3082_result.JPG
ID=24 
SCALE=0.032994
LM=6
117.00000 896.00000
505.00000 1089.00000
663.00000 845.00000
515.00000 577.00000
330.00000 740.00000
301.00000 916.00000
IMAGE=C:\Users\Will\Dropbox\Morphology to Micorbiome (Salmo salar)\Head morphology\Salmon photos - analysis\Edited photos\YC2 2SW rotate\Farm54_IMG_2844_result.JPG
ID=25 
SCALE=0.035970
LM=6
101.00000 848.00000
588.00000 1031.00000
763.00000 779.00000
628.00000 502.00000
377.00000 654.00000
349.00000 844.00000
IMAGE=C:\Users\Will\Dropbox\Morphology to Micorbiome (Salmo salar)\Head morphology\Salmon photos - analysis\Edited photos\YC2 2SW rotate\Farm54_IMG_2851_result.JPG
ID=26 
SCALE=0.035963
LM=6
741.00000 709.00000
1242.00000 927.00000
1428.00000 703.00000
1260.00000 404.00000
1041.00000 534.00000
1015.00000 723.00000
IMAGE=C:\Users\Will\Dropbox\Morphology to Micorbiome (Salmo salar)\Head morphology\Salmon photos - analysis\Edited photos\YC2 2SW rotate\Farm54_IMG_2951_result.JPG
ID=27 
SCALE=0.033384
LM=6
832.00000 804.00000
1371.00000 1013.00000
1662.00000 690.00000
1432.00000 440.00000
1195.00000 592.00000
1181.00000 800.00000
IMAGE=C:\Users\Will\Dropbox\Morphology to Micorbiome (Salmo salar)\Head morphology\Salmon photos - analysis\Edited photos\YC2 2SW rotate\Farm54_IMG_2996_result.JPG
ID=28 
SCALE=0.033422
LM=6
871.00000 856.00000
1486.00000 1141.00000
1725.00000 884.00000
1450.00000 508.00000
1280.00000 679.00000
1232.00000 873.00000
IMAGE=C:\Users\Will\Dropbox\Morphology to Micorbiome (Salmo salar)\Head morphology\Salmon photos - analysis\Edited photos\YC2 2SW rotate\Farm54_IMG_3037_result.JPG
ID=29 
SCALE=0.034843
LM=6
763.00000 962.00000
1318.00000 1138.00000
1539.00000 837.00000
1280.00000 584.00000
1066.00000 759.00000
1050.00000 949.00000
IMAGE=C:\Users\Will\Dropbox\Morphology to Micorbiome (Salmo salar)\Head morphology\Salmon photos - analysis\Edited photos\YC2 2SW rotate\Farm54_IMG_3104_result.JPG
ID=30 
SCALE=0.034207
LM=6
1107.00000 713.00000
1297.00000 816.00000
1381.00000 729.00000
1321.00000 620.00000
1216.00000 655.00000
1206.00000 723.00000
IMAGE=C:\Users\Will\Dropbox\Morphology to Micorbiome (Salmo salar)\Head morphology\Salmon photos - analysis\Edited photos\YC2 2SW rotate\Fi23_IMG_2942_result.JPG
ID=31 
SCALE=0.032985
LM=6
847.00000 818.00000
1248.00000 996.00000
1400.00000 797.00000
1290.00000 601.00000
1084.00000 703.00000
1076.00000 838.00000
IMAGE=C:\Users\Will\Dropbox\Morphology to Micorbiome (Salmo salar)\Head morphology\Salmon photos - analysis\Edited photos\YC2 2SW rotate\Fi23_IMG_3022_result.JPG
ID=32 
SCALE=0.033784
LM=6
957.00000 785.00000
1186.00000 879.00000
1277.00000 746.00000
1202.00000 658.00000
1082.00000 708.00000
1071.00000 786.00000
IMAGE=C:\Users\Will\Dropbox\Morphology to Micorbiome (Salmo salar)\Head morphology\Salmon photos - analysis\Edited photos\YC2 2SW rotate\Fi39_IMG_2911_result.JPG
ID=34 
SCALE=0.033515
LM=6
721.00000 854.00000
938.00000 939.00000
1011.00000 821.00000
943.00000 717.00000
835.00000 777.00000
827.00000 852.00000
IMAGE=C:\Users\Will\Dropbox\Morphology to Micorbiome (Salmo salar)\Head morphology\Salmon photos - analysis\Edited photos\YC2 2SW rotate\Fi39_IMG_3034_result.JPG
ID=35 
SCALE=0.033784
LM=6
696.00000 797.00000
921.00000 932.00000
1016.00000 822.00000
941.00000 693.00000
842.00000 746.00000
820.00000 827.00000
IMAGE=C:\Users\Will\Dropbox\Morphology to Micorbiome (Salmo salar)\Head morphology\Salmon photos - analysis\Edited photos\YC2 2SW rotate\Fi43_IMG_3110_result.JPG
ID=37 
SCALE=0.034602
LM=6
726.00000 705.00000
987.00000 829.00000
1102.00000 671.00000
1015.00000 518.00000
888.00000 598.00000
862.00000 708.00000
IMAGE=C:\Users\Will\Dropbox\Morphology to Micorbiome (Salmo salar)\Head morphology\Salmon photos - analysis\Edited photos\YC2 2SW rotate\Fi47_IMG_2965_result.JPG
ID=38 
SCALE=0.034721
LM=6
794.00000 700.00000
1272.00000 894.00000
1442.00000 685.00000
1303.00000 448.00000
1101.00000 541.00000
1089.00000 711.00000
IMAGE=C:\Users\Will\Dropbox\Morphology to Micorbiome (Salmo salar)\Head morphology\Salmon photos - analysis\Edited photos\YC2 2SW rotate\Fi51_IMG_2936_result.JPG
ID=39 
SCALE=0.034227
LM=6
824.00000 763.00000
1015.00000 852.00000
1086.00000 733.00000
1006.00000 643.00000
927.00000 698.00000
916.00000 768.00000
IMAGE=C:\Users\Will\Dropbox\Morphology to Micorbiome (Salmo salar)\Head morphology\Salmon photos - analysis\Edited photos\YC2 2SW rotate\Fi55_IMG_2983_result.JPG
ID=40 
SCALE=0.033784
LM=6
723.00000 780.00000
1210.00000 999.00000
1432.00000 698.00000
1217.00000 474.00000
1029.00000 596.00000
999.00000 794.00000
IMAGE=C:\Users\Will\Dropbox\Morphology to Micorbiome (Salmo salar)\Head morphology\Salmon photos - analysis\Edited photos\YC2 2SW rotate\FM32_IMG_2974_result.JPG
ID=41 
SCALE=0.034601
LM=6
717.00000 691.00000
1216.00000 965.00000
1452.00000 678.00000
1259.00000 417.00000
1043.00000 527.00000
998.00000 739.00000
IMAGE=C:\Users\Will\Dropbox\Morphology to Micorbiome (Salmo salar)\Head morphology\Salmon photos - analysis\Edited photos\YC2 2SW rotate\FM32_IMG_2990_result.JPG
ID=42 
SCALE=0.034470
LM=6
745.00000 746.00000
1235.00000 937.00000
1432.00000 630.00000
1279.00000 485.00000
1033.00000 586.00000
1015.00000 748.00000
IMAGE=C:\Users\Will\Dropbox\Morphology to Micorbiome (Salmo salar)\Head morphology\Salmon photos - analysis\Edited photos\YC2 2SW rotate\FM40_IMG_2956_result.JPG
ID=45 
SCALE=0.034556
LM=6
797.00000 688.00000
1272.00000 903.00000
1498.00000 640.00000
1336.00000 410.00000
1127.00000 524.00000
1104.00000 705.00000
IMAGE=C:\Users\Will\Dropbox\Morphology to Micorbiome (Salmo salar)\Head morphology\Salmon photos - analysis\Edited photos\YC2 2SW rotate\FM44_IMG_2930_result.JPG
ID=46 
SCALE=0.034340
LM=6
922.00000 784.00000
1290.00000 901.00000
1418.00000 700.00000
1243.00000 553.00000
1146.00000 665.00000
1137.00000 784.00000
IMAGE=C:\Users\Will\Dropbox\Morphology to Micorbiome (Salmo salar)\Head morphology\Salmon photos - analysis\Edited photos\YC2 2SW rotate\FM48_IMG_3129_result.JPG
ID=47 
SCALE=0.033550
LM=6
844.00000 690.00000
1245.00000 901.00000
1419.00000 689.00000
1303.00000 481.00000
1137.00000 567.00000
1085.00000 718.00000
IMAGE=C:\Users\Will\Dropbox\Morphology to Micorbiome (Salmo salar)\Head morphology\Salmon photos - analysis\Edited photos\YC2 2SW rotate\FM52_IMG_2863_result.JPG
ID=48 
SCALE=0.034340
LM=6
713.00000 746.00000
1111.00000 922.00000
1330.00000 682.00000
1200.00000 494.00000
984.00000 580.00000
956.00000 738.00000
IMAGE=C:\Users\Will\Dropbox\Morphology to Micorbiome (Salmo salar)\Head morphology\Salmon photos - analysis\Edited photos\YC2 2SW rotate\FM52_IMG_2869_result.JPG
ID=49 
SCALE=0.034106
LM=6
810.00000 941.00000
1303.00000 1105.00000
1526.00000 841.00000
1343.00000 620.00000
1127.00000 744.00000
1106.00000 916.00000
IMAGE=C:\Users\Will\Dropbox\Morphology to Micorbiome (Salmo salar)\Head morphology\Salmon photos - analysis\Edited photos\YC2 2SW rotate\FM52_IMG_3062_result.JPG
ID=50 
SCALE=0.034246
LM=6
638.00000 943.00000
1289.00000 1158.00000
1483.00000 820.00000
1236.00000 524.00000
1039.00000 699.00000
1000.00000 926.00000
IMAGE=C:\Users\Will\Dropbox\Morphology to Micorbiome (Salmo salar)\Head morphology\Salmon photos - analysis\Edited photos\YC2 2SW rotate\MF25_IMG_3059_result.JPG
ID=51 
SCALE=0.034965
LM=6
104.00000 917.00000
485.00000 1053.00000
617.00000 815.00000
513.00000 592.00000
297.00000 722.00000
292.00000 892.00000
IMAGE=C:\Users\Will\Dropbox\Morphology to Micorbiome (Salmo salar)\Head morphology\Salmon photos - analysis\Edited photos\YC2 2SW rotate\MF29_IMG_2823_result.JPG
ID=52 
SCALE=0.036358
LM=6
639.00000 913.00000
1148.00000 1076.00000
1306.00000 779.00000
1098.00000 573.00000
912.00000 718.00000
896.00000 898.00000
IMAGE=C:\Users\Will\Dropbox\Morphology to Micorbiome (Salmo salar)\Head morphology\Salmon photos - analysis\Edited photos\YC2 2SW rotate\MF29_IMG_3047_result.JPG
ID=53 
SCALE=0.034602
LM=6
646.00000 689.00000
904.00000 830.00000
1023.00000 691.00000
962.00000 525.00000
813.00000 601.00000
791.00000 706.00000
IMAGE=C:\Users\Will\Dropbox\Morphology to Micorbiome (Salmo salar)\Head morphology\Salmon photos - analysis\Edited photos\YC2 2SW rotate\MF37_IMG_2993_result.JPG
ID=62 
SCALE=0.034572
LM=6
782.00000 766.00000
954.00000 895.00000
1063.00000 787.00000
1012.00000 685.00000
905.00000 718.00000
884.00000 790.00000
IMAGE=C:\Users\Will\Dropbox\Morphology to Micorbiome (Salmo salar)\Head morphology\Salmon photos - analysis\Edited photos\YC2 2SW rotate\MF37_IMG_3085_result.JPG
ID=63 
SCALE=0.034276
LM=6
93.00000 836.00000
585.00000 1035.00000
747.00000 781.00000
625.00000 540.00000
384.00000 649.00000
358.00000 846.00000
IMAGE=C:\Users\Will\Dropbox\Morphology to Micorbiome (Salmo salar)\Head morphology\Salmon photos - analysis\Edited photos\YC2 2SW rotate\MF45_IMG_2816_result.JPG
ID=64 
SCALE=0.074552
LM=6
839.00000 672.00000
1408.00000 940.00000
1645.00000 650.00000
1435.00000 390.00000
1231.00000 500.00000
1187.00000 703.00000
IMAGE=C:\Users\Will\Dropbox\Morphology to Micorbiome (Salmo salar)\Head morphology\Salmon photos - analysis\Edited photos\YC2 2SW rotate\MF45_IMG_2945_result.JPG
ID=65 
SCALE=0.034165
LM=6
765.00000 905.00000
1347.00000 1096.00000
1573.00000 826.00000
1436.00000 566.00000
1153.00000 681.00000
1133.00000 895.00000
IMAGE=C:\Users\Will\Dropbox\Morphology to Micorbiome (Salmo salar)\Head morphology\Salmon photos - analysis\Edited photos\YC2 2SW rotate\MF45_IMG_3075_result.JPG
ID=66 
SCALE=0.034931
LM=6
671.00000 894.00000
1261.00000 1097.00000
1450.00000 760.00000
1175.00000 522.00000
1012.00000 685.00000
1009.00000 895.00000
IMAGE=C:\Users\Will\Dropbox\Morphology to Micorbiome (Salmo salar)\Head morphology\Salmon photos - analysis\Edited photos\YC2 2SW rotate\MF45_IMG_3088_result.JPG
ID=67 
SCALE=0.035423
LM=6
869.00000 893.00000
1500.00000 1108.00000
1729.00000 842.00000
1551.00000 575.00000
1332.00000 698.00000
1291.00000 894.00000
IMAGE=C:\Users\Will\Dropbox\Morphology to Micorbiome (Salmo salar)\Head morphology\Salmon photos - analysis\Edited photos\YC2 2SW rotate\MF45_IMG_3098_result.JPG
ID=68 
SCALE=0.034085
LM=6
926.00000 923.00000
1485.00000 1091.00000
1672.00000 801.00000
1470.00000 605.00000
1275.00000 728.00000
1257.00000 915.00000
IMAGE=C:\Users\Will\Dropbox\Morphology to Micorbiome (Salmo salar)\Head morphology\Salmon photos - analysis\Edited photos\YC2 2SW rotate\MF45_IMG_3123_result.JPG
ID=69 
SCALE=0.033661
LM=6
690.00000 925.00000
1274.00000 1069.00000
1520.00000 798.00000
1316.00000 524.00000
1093.00000 677.00000
1064.00000 881.00000
IMAGE=C:\Users\Will\Dropbox\Morphology to Micorbiome (Salmo salar)\Head morphology\Salmon photos - analysis\Edited photos\YC2 2SW rotate\MF49_IMG_3019_result.JPG
ID=70 
SCALE=0.033781
LM=6
676.00000 780.00000
1203.00000 983.00000
1429.00000 724.00000
1208.00000 474.00000
1021.00000 603.00000
983.00000 797.00000
IMAGE=C:\Users\Will\Dropbox\Morphology to Micorbiome (Salmo salar)\Head morphology\Salmon photos - analysis\Edited photos\YC2 2SW rotate\MF53_IMG_2828_result.JPG
ID=71 
SCALE=0.033879
LM=6
533.00000 687.00000
1091.00000 923.00000
1325.00000 684.00000
1083.00000 372.00000
899.00000 495.00000
857.00000 701.00000
IMAGE=C:\Users\Will\Dropbox\Morphology to Micorbiome (Salmo salar)\Head morphology\Salmon photos - analysis\Edited photos\YC2 2SW rotate\MF53_IMG_2872_result.JPG
ID=72 
SCALE=0.034965
LM=6
723.00000 759.00000
1229.00000 945.00000
1433.00000 699.00000
1244.00000 462.00000
1056.00000 580.00000
1036.00000 762.00000
IMAGE=C:\Users\Will\Dropbox\Morphology to Micorbiome (Salmo salar)\Head morphology\Salmon photos - analysis\Edited photos\YC2 2SW rotate\MF53_IMG_2980_result.JPG
ID=73 
SCALE=0.034473
LM=6
648.00000 879.00000
1073.00000 1079.00000
1267.00000 822.00000
1060.00000 587.00000
899.00000 723.00000
866.00000 888.00000
IMAGE=C:\Users\Will\Dropbox\Morphology to Micorbiome (Salmo salar)\Head morphology\Salmon photos - analysis\Edited photos\YC2 2SW rotate\MF53_IMG_3043_result.JPG
ID=74 
SCALE=0.034719
LM=6
721.00000 949.00000
1203.00000 1174.00000
1401.00000 953.00000
1192.00000 688.00000
1025.00000 826.00000
988.00000 1007.00000
IMAGE=C:\Users\Will\Dropbox\Morphology to Micorbiome (Salmo salar)\Head morphology\Salmon photos - analysis\Edited photos\YC2 2SW rotate\MF53_IMG_3053_result.JPG
ID=75 
SCALE=0.034359
LM=6
839.00000 874.00000
1269.00000 1026.00000
1438.00000 826.00000
1277.00000 617.00000
1123.00000 725.00000
1096.00000 879.00000
IMAGE=C:\Users\Will\Dropbox\Morphology to Micorbiome (Salmo salar)\Head morphology\Salmon photos - analysis\Edited photos\YC2 2SW rotate\MF53_IMG_3095_result.JPG
ID=76 
SCALE=0.034443
LM=6
877.00000 885.00000
1327.00000 1063.00000
1480.00000 851.00000
1294.00000 629.00000
1156.00000 760.00000
1138.00000 920.00000
IMAGE=C:\Users\Will\Dropbox\Morphology to Micorbiome (Salmo salar)\Head morphology\Salmon photos - analysis\Edited photos\YC2 2SW rotate\MF53_IMG_3101- F09_result.JPG
ID=77 
SCALE=0.034207
LM=6
180.00000 740.00000
497.00000 913.00000
625.00000 711.00000
527.00000 532.00000
356.00000 629.00000
331.00000 764.00000
IMAGE=C:\Users\Will\Dropbox\Morphology to Micorbiome (Salmo salar)\Head morphology\Salmon photos - analysis\Edited photos\YC2 2SW rotate\V15_IMG_2819_result.JPG
ID=78 
SCALE=0.071429
LM=6
104.00000 850.00000
379.00000 998.00000
470.00000 829.00000
371.00000 677.00000
231.00000 767.00000
217.00000 883.00000
IMAGE=C:\Users\Will\Dropbox\Morphology to Micorbiome (Salmo salar)\Head morphology\Salmon photos - analysis\Edited photos\YC2 2SW rotate\V15_IMG_2841_result.JPG
ID=79 
SCALE=0.035549
LM=6
116.00000 800.00000
432.00000 943.00000
549.00000 754.00000
463.00000 586.00000
299.00000 667.00000
277.00000 808.00000
IMAGE=C:\Users\Will\Dropbox\Morphology to Micorbiome (Salmo salar)\Head morphology\Salmon photos - analysis\Edited photos\YC2 2SW rotate\V15_IMG_2847_result.JPG
ID=80 
SCALE=0.035088
LM=6
776.00000 604.00000
1127.00000 793.00000
1309.00000 605.00000
1202.00000 417.00000
1019.00000 495.00000
979.00000 628.00000
IMAGE=C:\Users\Will\Dropbox\Morphology to Micorbiome (Salmo salar)\Head morphology\Salmon photos - analysis\Edited photos\YC2 2SW rotate\V15_IMG_2908_result.JPG
ID=81 
SCALE=0.034299
LM=6
1022.00000 653.00000
1434.00000 870.00000
1653.00000 686.00000
1489.00000 456.00000
1329.00000 534.00000
1278.00000 683.00000
IMAGE=C:\Users\Will\Dropbox\Morphology to Micorbiome (Salmo salar)\Head morphology\Salmon photos - analysis\Edited photos\YC2 2SW rotate\V15_IMG_2927_result.JPG
ID=82 
SCALE=0.034222
LM=6
924.00000 713.00000
1233.00000 856.00000
1337.00000 684.00000
1238.00000 539.00000
1100.00000 625.00000
1082.00000 726.00000
IMAGE=C:\Users\Will\Dropbox\Morphology to Micorbiome (Salmo salar)\Head morphology\Salmon photos - analysis\Edited photos\YC2 2SW rotate\V15_IMG_2962_result.JPG
ID=83 
SCALE=0.034475
LM=6
722.00000 684.00000
952.00000 817.00000
1062.00000 690.00000
988.00000 567.00000
876.00000 615.00000
845.00000 707.00000
IMAGE=C:\Users\Will\Dropbox\Morphology to Micorbiome (Salmo salar)\Head morphology\Salmon photos - analysis\Edited photos\YC2 2SW rotate\V16_IMG_2887_result.JPG
ID=84 
SCALE=0.034430
LM=6
1027.00000 699.00000
1243.00000 814.00000
1361.00000 727.00000
1285.00000 575.00000
1182.00000 631.00000
1159.00000 720.00000
IMAGE=C:\Users\Will\Dropbox\Morphology to Micorbiome (Salmo salar)\Head morphology\Salmon photos - analysis\Edited photos\YC2 2SW rotate\V16_IMG_2921_result.JPG
ID=85 
SCALE=0.033418
LM=6
757.00000 841.00000
1140.00000 981.00000
1228.00000 756.00000
1098.00000 593.00000
967.00000 708.00000
946.00000 832.00000
IMAGE=C:\Users\Will\Dropbox\Morphology to Micorbiome (Salmo salar)\Head morphology\Salmon photos - analysis\Edited photos\YC2 2SW rotate\V16_IMG_3072_result.JPG
ID=86 
SCALE=0.034213
LM=6
788.00000 695.00000
1070.00000 834.00000
1182.00000 687.00000
1100.00000 534.00000
961.00000 605.00000
941.00000 713.00000
IMAGE=C:\Users\Will\Dropbox\Morphology to Micorbiome (Salmo salar)\Head morphology\Salmon photos - analysis\Edited photos\YC2 2SW rotate\V17_IMG_2881_result.JPG
ID=87 
SCALE=0.033779
LM=6
830.00000 736.00000
1314.00000 954.00000
1507.00000 722.00000
1356.00000 515.00000
1148.00000 602.00000
1123.00000 776.00000
IMAGE=C:\Users\Will\Dropbox\Morphology to Micorbiome (Salmo salar)\Head morphology\Salmon photos - analysis\Edited photos\YC2 2SW rotate\V17_IMG_2918_result.JPG
ID=88 
SCALE=0.033998
LM=6
763.00000 861.00000
1154.00000 988.00000
1292.00000 775.00000
1196.00000 630.00000
993.00000 714.00000
991.00000 851.00000
IMAGE=C:\Users\Will\Dropbox\Morphology to Micorbiome (Salmo salar)\Head morphology\Salmon photos - analysis\Edited photos\YC2 2SW rotate\V17_IMG_3132 -F19_result.JPG
ID=89 
SCALE=0.034009
LM=6
93.00000 847.00000
514.00000 1049.00000
616.00000 806.00000
483.00000 577.00000
300.00000 704.00000
282.00000 875.00000
IMAGE=C:\Users\Will\Dropbox\Morphology to Micorbiome (Salmo salar)\Head morphology\Salmon photos - analysis\Edited photos\YC2 2SW rotate\V19_IMG_2834_result.JPG
ID=90 
SCALE=0.036980
LM=6
839.00000 742.00000
1242.00000 918.00000
1471.00000 710.00000
1270.00000 470.00000
1123.00000 605.00000
1090.00000 762.00000
IMAGE=C:\Users\Will\Dropbox\Morphology to Micorbiome (Salmo salar)\Head morphology\Salmon photos - analysis\Edited photos\YC2 2SW rotate\V19_IMG_2968_result.JPG
ID=91 
SCALE=0.033333
LM=6
682.00000 874.00000
1141.00000 1049.00000
1317.00000 844.00000
1142.00000 619.00000
972.00000 740.00000
939.00000 897.00000
IMAGE=C:\Users\Will\Dropbox\Morphology to Micorbiome (Salmo salar)\Head morphology\Salmon photos - analysis\Edited photos\YC2 2SW rotate\V19_IMG_3025_result.JPG
ID=92 
SCALE=0.033332
LM=6
965.00000 775.00000
1264.00000 923.00000
1394.00000 754.00000
1294.00000 613.00000
1148.00000 701.00000
1126.00000 796.00000
IMAGE=C:\Users\Will\Dropbox\Morphology to Micorbiome (Salmo salar)\Head morphology\Salmon photos - analysis\Edited photos\YC2 2SW rotate\V19_IMG_3116_result.JPG
ID=93 
SCALE=0.034227
LM=6
817.00000 687.00000
1294.00000 917.00000
1513.00000 675.00000
1351.00000 440.00000
1143.00000 523.00000
1100.00000 705.00000
IMAGE=C:\Users\Will\Dropbox\Morphology to Micorbiome (Salmo salar)\Head morphology\Salmon photos - analysis\Edited photos\YC2 2SW rotate\V20_IMG_2915_result.JPG
ID=94 
SCALE=0.033503
LM=6
581.00000 949.00000
1046.00000 1058.00000
1223.00000 796.00000
1043.00000 625.00000
857.00000 741.00000
838.00000 902.00000
IMAGE=C:\Users\Will\Dropbox\Morphology to Micorbiome (Salmo salar)\Head morphology\Salmon photos - analysis\Edited photos\YC2 2SW rotate\V20_IMG_3056_result.JPG
ID=95 
SCALE=0.034595
LM=6
707.00000 812.00000
1090.00000 963.00000
1275.00000 744.00000
1105.00000 572.00000
957.00000 667.00000
926.00000 811.00000
IMAGE=C:\Users\Will\Dropbox\Morphology to Micorbiome (Salmo salar)\Head morphology\Salmon photos - analysis\Edited photos\YC2 2SW rotate\V22_IMG_3079_result.JPG
ID=96 
SCALE=0.033324
LM=6
981.00000 885.00000
1410.00000 1005.00000
1577.00000 794.00000
1416.00000 620.00000
1239.00000 712.00000
1237.00000 859.00000
IMAGE=C:\Users\Will\Dropbox\Morphology to Micorbiome (Salmo salar)\Head morphology\Salmon photos - analysis\Edited photos\YC2 2SW rotate\V22_IMG_3120_result.JPG
ID=97 
SCALE=0.033329
LM=6
186.00000 2258.00000
469.00000 2348.00000
559.00000 2224.00000
455.00000 2082.00000
358.00000 2162.00000
348.00000 2262.00000
IMAGE=C:\Users\Will\Desktop\Salmon photos - analysis\MATURE MALES 2016 (YC 2, 3 SW)\cropped\IMG_0557_result.JPG
ID=1 
SCALE=0.069418
LM=6
282.00000 2249.00000
528.00000 2322.00000
608.00000 2224.00000
494.00000 2090.00000
413.00000 2172.00000
413.00000 2255.00000
IMAGE=C:\Users\Will\Desktop\Salmon photos - analysis\MATURE MALES 2016 (YC 2, 3 SW)\cropped\IMG_0566_result.JPG
ID=3 
SCALE=0.067414
LM=6
357.00000 2288.00000
673.00000 2366.00000
747.00000 2199.00000
610.00000 2061.00000
507.00000 2180.00000
520.00000 2284.00000
IMAGE=C:\Users\Will\Desktop\Salmon photos - analysis\MATURE MALES 2016 (YC 2, 3 SW)\cropped\IMG_0569_result.JPG
ID=4 
SCALE=0.067414
LM=6
401.00000 2250.00000
703.00000 2334.00000
809.00000 2188.00000
671.00000 2036.00000
579.00000 2160.00000
581.00000 2254.00000
IMAGE=C:\Users\Will\Desktop\Salmon photos - analysis\MATURE MALES 2016 (YC 2, 3 SW)\cropped\IMG_0572_result.JPG
ID=5 
SCALE=0.069205
LM=6
360.00000 2228.00000
627.00000 2329.00000
710.00000 2199.00000
565.00000 2076.00000
502.00000 2159.00000
508.00000 2251.00000
IMAGE=C:\Users\Will\Desktop\Salmon photos - analysis\MATURE MALES 2016 (YC 2, 3 SW)\cropped\IMG_0578_result.JPG
ID=7 
SCALE=0.069278
LM=6
323.00000 2270.00000
574.00000 2310.00000
654.00000 2199.00000
490.00000 2061.00000
450.00000 2155.00000
463.00000 2249.00000
IMAGE=C:\Users\Will\Desktop\Salmon photos - analysis\MATURE MALES 2016 (YC 2, 3 SW)\cropped\IMG_0581_result.JPG
ID=8 
SCALE=0.067414
LM=6
339.00000 2222.00000
574.00000 2301.00000
642.00000 2185.00000
547.00000 2085.00000
469.00000 2158.00000
461.00000 2233.00000
IMAGE=C:\Users\Will\Desktop\Salmon photos - analysis\MATURE MALES 2016 (YC 2, 3 SW)\cropped\IMG_0584_result.JPG
ID=9 
SCALE=0.067414
LM=6
325.00000 2265.00000
584.00000 2326.00000
659.00000 2204.00000
518.00000 2053.00000
448.00000 2162.00000
460.00000 2253.00000
IMAGE=C:\Users\Will\Desktop\Salmon photos - analysis\MATURE MALES 2016 (YC 2, 3 SW)\cropped\IMG_0590_result.JPG
ID=10 
SCALE=0.068263
LM=6
312.00000 2265.00000
614.00000 2325.00000
707.00000 2205.00000
581.00000 2049.00000
478.00000 2140.00000
484.00000 2246.00000
IMAGE=C:\Users\Will\Desktop\Salmon photos - analysis\MATURE MALES 2016 (YC 2, 3 SW)\cropped\IMG_0593_result.JPG
ID=11 
SCALE=0.067267
LM=6
297.00000 2217.00000
597.00000 2319.00000
706.00000 2179.00000
589.00000 2044.00000
484.00000 2119.00000
483.00000 2220.00000
IMAGE=C:\Users\Will\Desktop\Salmon photos - analysis\MATURE MALES 2016 (YC 2, 3 SW)\cropped\IMG_0596_result.JPG
ID=12 
SCALE=0.067347
LM=6
295.00000 2229.00000
513.00000 2294.00000
582.00000 2184.00000
480.00000 2082.00000
403.00000 2151.00000
415.00000 2231.00000
IMAGE=C:\Users\Will\Desktop\Salmon photos - analysis\MATURE MALES 2016 (YC 2, 3 SW)\cropped\IMG_0599_result.JPG
ID=13 
SCALE=0.067347
LM=6
228.00000 2255.00000
533.00000 2374.00000
632.00000 2220.00000
520.00000 2062.00000
413.00000 2160.00000
394.00000 2267.00000
IMAGE=C:\Users\Will\Desktop\Salmon photos - analysis\MATURE MALES 2016 (YC 2, 3 SW)\cropped\IMG_0602_result.JPG
ID=14 
SCALE=0.067347
LM=6
336.00000 2124.00000
608.00000 2268.00000
735.00000 2185.00000
603.00000 1977.00000
530.00000 2063.00000
508.00000 2169.00000
IMAGE=C:\Users\Will\Desktop\Salmon photos - analysis\MATURE MALES 2016 (YC 2, 3 SW)\cropped\IMG_0607_result.JPG
ID=15 
SCALE=0.061724
LM=6
303.00000 2182.00000
598.00000 2280.00000
687.00000 2212.00000
557.00000 2007.00000
474.00000 2099.00000
474.00000 2199.00000
IMAGE=C:\Users\Will\Desktop\Salmon photos - analysis\MATURE MALES 2016 (YC 2, 3 SW)\cropped\IMG_0611_result.JPG
ID=16 
SCALE=0.060971
LM=6
405.00000 2158.00000
550.00000 2232.00000
610.00000 2159.00000
546.00000 2070.00000
490.00000 2123.00000
486.00000 2177.00000
IMAGE=C:\Users\Will\Desktop\Salmon photos - analysis\MATURE MALES 2016 (YC 2, 3 SW)\cropped\IMG_0617_result.JPG
ID=18 
SCALE=0.061686
LM=6
343.00000 2183.00000
630.00000 2288.00000
704.00000 2166.00000
590.00000 2042.00000
501.00000 2113.00000
508.00000 2208.00000
IMAGE=C:\Users\Will\Desktop\Salmon photos - analysis\MATURE MALES 2016 (YC 2, 3 SW)\cropped\IMG_0620_result.JPG
ID=19 
SCALE=0.061686
LM=6
347.00000 2271.00000
711.00000 2340.00000
824.00000 2223.00000
633.00000 2002.00000
547.00000 2147.00000
557.00000 2254.00000
IMAGE=C:\Users\Will\Desktop\Salmon photos - analysis\MATURE MALES 2016 (YC 2, 3 SW)\cropped\IMG_0623_result.JPG
ID=20 
SCALE=0.060903
LM=6
412.00000 2256.00000
757.00000 2372.00000
877.00000 2269.00000
696.00000 2053.00000
601.00000 2165.00000
612.00000 2290.00000
IMAGE=C:\Users\Will\Desktop\Salmon photos - analysis\MATURE MALES 2016 (YC 2, 3 SW)\cropped\IMG_0626_result.JPG
ID=21 
SCALE=0.061653
LM=6
322.00000 2236.00000
684.00000 2316.00000
799.00000 2168.00000
616.00000 1992.00000
546.00000 2109.00000
538.00000 2226.00000
IMAGE=C:\Users\Will\Desktop\Salmon photos - analysis\MATURE MALES 2016 (YC 2, 3 SW)\cropped\IMG_0629_result.JPG
ID=22 
SCALE=0.063246
LM=6
301.00000 2252.00000
673.00000 2380.00000
765.00000 2228.00000
636.00000 2052.00000
505.00000 2160.00000
494.00000 2285.00000
IMAGE=C:\Users\Will\Desktop\Salmon photos - analysis\MATURE MALES 2016 (YC 2, 3 SW)\cropped\IMG_0632_result.JPG
ID=23 
SCALE=0.063271
LM=6
348.00000 2238.00000
608.00000 2307.00000
690.00000 2200.00000
573.00000 2067.00000
497.00000 2145.00000
495.00000 2234.00000
IMAGE=C:\Users\Will\Desktop\Salmon photos - analysis\MATURE MALES 2016 (YC 2, 3 SW)\cropped\IMG_0635_result.JPG
ID=24 
SCALE=0.063271
LM=6
302.00000 2241.00000
614.00000 2345.00000
679.00000 2207.00000
546.00000 2080.00000
471.00000 2172.00000
474.00000 2268.00000
IMAGE=C:\Users\Will\Desktop\Salmon photos - analysis\MATURE MALES 2016 (YC 2, 3 SW)\cropped\IMG_0638_result.JPG
ID=25 
SCALE=0.063271
LM=6
347.00000 2291.00000
648.00000 2351.00000
727.00000 2216.00000
570.00000 2082.00000
516.00000 2183.00000
518.00000 2279.00000
IMAGE=C:\Users\Will\Desktop\Salmon photos - analysis\MATURE MALES 2016 (YC 2, 3 SW)\cropped\IMG_0641_result.JPG
ID=26 
SCALE=0.063271
LM=6
340.00000 2225.00000
582.00000 2314.00000
664.00000 2177.00000
527.00000 2069.00000
477.00000 2152.00000
470.00000 2240.00000
IMAGE=C:\Users\Will\Desktop\Salmon photos - analysis\MATURE MALES 2016 (YC 2, 3 SW)\cropped\IMG_0644_result.JPG
ID=27 
SCALE=0.063271
LM=6
389.00000 2128.00000
718.00000 2215.00000
828.00000 2069.00000
679.00000 1924.00000
582.00000 2031.00000
589.00000 2133.00000
IMAGE=C:\Users\Will\Desktop\Salmon photos - analysis\MATURE MALES 2016 (YC 2, 3 SW)\cropped\IMG_0647_result.JPG
ID=28 
SCALE=0.065784
LM=6
387.00000 2113.00000
677.00000 2227.00000
766.00000 2105.00000
654.00000 1971.00000
576.00000 2049.00000
563.00000 2147.00000
IMAGE=C:\Users\Will\Desktop\Salmon photos - analysis\MATURE MALES 2016 (YC 2, 3 SW)\cropped\IMG_0650_result.JPG
ID=29 
SCALE=0.065784
LM=6
325.00000 2133.00000
653.00000 2250.00000
744.00000 2113.00000
578.00000 1944.00000
499.00000 2050.00000
496.00000 2163.00000
IMAGE=C:\Users\Will\Desktop\Salmon photos - analysis\MATURE MALES 2016 (YC 2, 3 SW)\cropped\IMG_0653_result.JPG
ID=30 
SCALE=0.065784
LM=6
348.00000 2136.00000
615.00000 2227.00000
672.00000 2108.00000
571.00000 1997.00000
492.00000 2071.00000
490.00000 2159.00000
IMAGE=C:\Users\Will\Desktop\Salmon photos - analysis\MATURE MALES 2016 (YC 2, 3 SW)\cropped\IMG_0657_result.JPG
ID=31 
SCALE=0.065784
LM=6
363.00000 2104.00000
642.00000 2215.00000
740.00000 2081.00000
635.00000 1957.00000
547.00000 2040.00000
532.00000 2131.00000
IMAGE=C:\Users\Will\Desktop\Salmon photos - analysis\MATURE MALES 2016 (YC 2, 3 SW)\cropped\IMG_0660_result.JPG
ID=32 
SCALE=0.065784
LM=6
428.00000 2135.00000
711.00000 2222.00000
830.00000 2107.00000
676.00000 1920.00000
592.00000 2031.00000
599.00000 2132.00000
IMAGE=C:\Users\Will\Desktop\Salmon photos - analysis\MATURE MALES 2016 (YC 2, 3 SW)\cropped\IMG_0664_result.JPG
ID=33 
SCALE=0.065784
LM=6
395.00000 2141.00000
727.00000 2243.00000
836.00000 2109.00000
660.00000 1953.00000
585.00000 2058.00000
580.00000 2162.00000
IMAGE=C:\Users\Will\Desktop\Salmon photos - analysis\MATURE MALES 2016 (YC 2, 3 SW)\cropped\IMG_0670_result.JPG
ID=35 
SCALE=0.065784
LM=6
383.00000 2156.00000
682.00000 2217.00000
781.00000 2107.00000
659.00000 1940.00000
563.00000 2035.00000
568.00000 2139.00000
IMAGE=C:\Users\Will\Desktop\Salmon photos - analysis\MATURE MALES 2016 (YC 2, 3 SW)\cropped\IMG_0673_result.JPG
ID=36 
SCALE=0.065784
LM=6
392.00000 2118.00000
679.00000 2227.00000
760.00000 2122.00000
639.00000 1977.00000
562.00000 2061.00000
554.00000 2153.00000
IMAGE=C:\Users\Will\Desktop\Salmon photos - analysis\MATURE MALES 2016 (YC 2, 3 SW)\cropped\IMG_0676_result.JPG
ID=37 
SCALE=0.065784
LM=6
387.00000 2085.00000
619.00000 2166.00000
714.00000 2063.00000
598.00000 1963.00000
541.00000 2017.00000
534.00000 2096.00000
IMAGE=C:\Users\Will\Desktop\Salmon photos - analysis\MATURE MALES 2016 (YC 2, 3 SW)\cropped\IMG_0679_result.JPG
ID=38 
SCALE=0.065784
LM=6
295.00000 2126.00000
648.00000 2243.00000
762.00000 2090.00000
604.00000 1906.00000
508.00000 2016.00000
510.00000 2138.00000
IMAGE=C:\Users\Will\Desktop\Salmon photos - analysis\MATURE MALES 2016 (YC 2, 3 SW)\cropped\IMG_0682_result.JPG
ID=39 
SCALE=0.065784
LM=6
301.00000 2142.00000
615.00000 2236.00000
706.00000 2079.00000
567.00000 1941.00000
495.00000 2038.00000
488.00000 2136.00000
IMAGE=C:\Users\Will\Desktop\Salmon photos - analysis\MATURE MALES 2016 (YC 2, 3 SW)\cropped\IMG_0685_result.JPG
ID=40 
SCALE=0.065784
LM=6
362.00000 2129.00000
674.00000 2231.00000
795.00000 2088.00000
663.00000 1932.00000
563.00000 2024.00000
553.00000 2130.00000
IMAGE=C:\Users\Will\Desktop\Salmon photos - analysis\MATURE MALES 2016 (YC 2, 3 SW)\cropped\IMG_0689_result.JPG
ID=41 
SCALE=0.064103
LM=6
358.00000 2178.00000
657.00000 2260.00000
742.00000 2127.00000
623.00000 1984.00000
519.00000 2074.00000
520.00000 2177.00000
IMAGE=C:\Users\Will\Desktop\Salmon photos - analysis\MATURE MALES 2016 (YC 2, 3 SW)\cropped\IMG_0692_result.JPG
ID=42 
SCALE=0.066519
LM=6
367.00000 2126.00000
684.00000 2219.00000
780.00000 2067.00000
651.00000 1923.00000
544.00000 2036.00000
536.00000 2145.00000
IMAGE=C:\Users\Will\Desktop\Salmon photos - analysis\MATURE MALES 2016 (YC 2, 3 SW)\cropped\IMG_0696_result.JPG
ID=43 
SCALE=0.066519
LM=6
359.00000 2120.00000
665.00000 2217.00000
740.00000 2102.00000
610.00000 1974.00000
542.00000 2048.00000
536.00000 2140.00000
IMAGE=C:\Users\Will\Desktop\Salmon photos - analysis\MATURE MALES 2016 (YC 2, 3 SW)\cropped\IMG_0699_result.JPG
ID=44 
SCALE=0.064935
LM=6
356.00000 2171.00000
702.00000 2260.00000
782.00000 2147.00000
625.00000 1982.00000
552.00000 2069.00000
551.00000 2185.00000
IMAGE=C:\Users\Will\Desktop\Salmon photos - analysis\MATURE MALES 2016 (YC 2, 3 SW)\cropped\IMG_0702_result.JPG
ID=45 
SCALE=0.066667
LM=6
396.00000 2137.00000
661.00000 2220.00000
766.00000 2105.00000
657.00000 1954.00000
570.00000 2039.00000
564.00000 2133.00000
IMAGE=C:\Users\Will\Desktop\Salmon photos - analysis\MATURE MALES 2016 (YC 2, 3 SW)\cropped\IMG_0706_result.JPG
ID=46 
SCALE=0.065784
LM=6
415.00000 2159.00000
742.00000 2259.00000
854.00000 2101.00000
719.00000 1952.00000
610.00000 2074.00000
604.00000 2171.00000
IMAGE=C:\Users\Will\Desktop\Salmon photos - analysis\MATURE MALES 2016 (YC 2, 3 SW)\cropped\IMG_0709_result.JPG
ID=47 
SCALE=0.065784
LM=6
332.00000 2119.00000
595.00000 2212.00000
683.00000 2095.00000
551.00000 1975.00000
501.00000 2046.00000
485.00000 2133.00000
IMAGE=C:\Users\Will\Desktop\Salmon photos - analysis\MATURE MALES 2016 (YC 2, 3 SW)\cropped\IMG_0712_result.JPG
ID=48 
SCALE=0.065784
LM=6
436.00000 2160.00000
710.00000 2256.00000
807.00000 2136.00000
708.00000 1999.00000
629.00000 2075.00000
606.00000 2168.00000
IMAGE=C:\Users\Will\Desktop\Salmon photos - analysis\MATURE MALES 2016 (YC 2, 3 SW)\cropped\IMG_0715_result.JPG
ID=49 
SCALE=0.065784
LM=6
327.00000 2096.00000
600.00000 2214.00000
705.00000 2088.00000
586.00000 1962.00000
503.00000 2031.00000
492.00000 2127.00000
IMAGE=C:\Users\Will\Desktop\Salmon photos - analysis\MATURE MALES 2016 (YC 2, 3 SW)\cropped\IMG_0718_result.JPG
ID=50 
SCALE=0.065784
LM=6
332.00000 2112.00000
632.00000 2251.00000
715.00000 2119.00000
612.00000 1995.00000
501.00000 2053.00000
510.00000 2164.00000
IMAGE=C:\Users\Will\Desktop\Salmon photos - analysis\MATURE MALES 2016 (YC 2, 3 SW)\cropped\IMG_0721_result.JPG
ID=51 
SCALE=0.065784
LM=6
375.00000 2151.00000
612.00000 2217.00000
684.00000 2108.00000
573.00000 2007.00000
508.00000 2082.00000
509.00000 2156.00000
IMAGE=C:\Users\Will\Desktop\Salmon photos - analysis\MATURE MALES 2016 (YC 2, 3 SW)\cropped\IMG_0724_result.JPG
ID=52 
SCALE=0.065784
LM=6
352.00000 2131.00000
593.00000 2227.00000
678.00000 2128.00000
582.00000 2008.00000
515.00000 2072.00000
496.00000 2147.00000
IMAGE=C:\Users\Will\Desktop\Salmon photos - analysis\MATURE MALES 2016 (YC 2, 3 SW)\cropped\IMG_0727_result.JPG
ID=53 
SCALE=0.065784
LM=6
299.00000 2140.00000
559.00000 2227.00000
631.00000 2116.00000
543.00000 1994.00000
453.00000 2063.00000
440.00000 2152.00000
IMAGE=C:\Users\Will\Desktop\Salmon photos - analysis\MATURE MALES 2016 (YC 2, 3 SW)\cropped\IMG_0730_result.JPG
ID=54 
SCALE=0.065784
LM=6
320.00000 2146.00000
625.00000 2241.00000
729.00000 2091.00000
604.00000 1949.00000
496.00000 2048.00000
491.00000 2149.00000
IMAGE=C:\Users\Will\Desktop\Salmon photos - analysis\MATURE MALES 2016 (YC 2, 3 SW)\cropped\IMG_0733_result.JPG
ID=55 
SCALE=0.065784
LM=6
290.00000 2118.00000
490.00000 2177.00000
532.00000 2075.00000
452.00000 1995.00000
383.00000 2057.00000
387.00000 2121.00000
IMAGE=C:\Users\Will\Desktop\Salmon photos - analysis\MATURE MALES 2016 (YC 2, 3 SW)\cropped\IMG_0736_result.JPG
ID=56 
SCALE=0.064103
LM=6
339.00000 2162.00000
599.00000 2224.00000
677.00000 2135.00000
538.00000 1992.00000
473.00000 2089.00000
483.00000 2173.00000
IMAGE=C:\Users\Will\Desktop\Salmon photos - analysis\MATURE MALES 2016 (YC 2, 3 SW)\cropped\IMG_0739_result.JPG
ID=57 
SCALE=0.065784
LM=6
290.00000 2191.00000
550.00000 2219.00000
620.00000 2104.00000
494.00000 1963.00000
404.00000 2080.00000
431.00000 2167.00000
IMAGE=C:\Users\Will\Desktop\Salmon photos - analysis\MATURE MALES 2016 (YC 2, 3 SW)\cropped\IMG_0745_result.JPG
ID=59 
SCALE=0.064097
LM=6
383.00000 2164.00000
687.00000 2243.00000
788.00000 2122.00000
574.00000 1959.00000
536.00000 2057.00000
550.00000 2166.00000
IMAGE=C:\Users\Will\Desktop\Salmon photos - analysis\MATURE MALES 2016 (YC 2, 3 SW)\cropped\IMG_0748_result.JPG
ID=60 
SCALE=0.064097
LM=6
341.00000 2216.00000
684.00000 2254.00000
765.00000 2084.00000
576.00000 1929.00000
498.00000 2078.00000
528.00000 2183.00000
IMAGE=C:\Users\Will\Desktop\Salmon photos - analysis\MATURE MALES 2016 (YC 2, 3 SW)\cropped\IMG_0752_result.JPG
ID=62 
SCALE=0.063971
LM=6
497.00000 351.00000
931.00000 602.00000
1064.00000 344.00000
844.00000 78.00000
666.00000 448.00000
677.00000 256.00000
IMAGE=C:\Users\Will\Dropbox\Morphology to Micorbiome (Salmo salar)\Head morphology\Female head morphology\labelled_final\InkedIMG_0839_result_LI.jpg
ID=0 
SCALE=0.016022
LM=6
512.00000 415.00000
1060.00000 640.00000
1149.00000 361.00000
904.00000 48.00000
691.00000 278.00000
710.00000 477.00000
IMAGE=C:\Users\Will\Dropbox\Morphology to Micorbiome (Salmo salar)\Head morphology\Female head morphology\labelled_final\InkedIMG_0841_result_LI.jpg
ID=1 
SCALE=0.016179
LM=6
358.00000 596.00000
908.00000 854.00000
1064.00000 567.00000
806.00000 196.00000
591.00000 402.00000
585.00000 625.00000
IMAGE=C:\Users\Will\Dropbox\Morphology to Micorbiome (Salmo salar)\Head morphology\Female head morphology\labelled_final\InkedIMG_0843_result_LI.jpg
ID=2 
SCALE=0.017182
LM=6
347.00000 623.00000
893.00000 825.00000
1043.00000 523.00000
781.00000 159.00000
547.00000 404.00000
550.00000 623.00000
IMAGE=C:\Users\Will\Dropbox\Morphology to Micorbiome (Salmo salar)\Head morphology\Female head morphology\labelled_final\InkedIMG_0845_result_LI.jpg
ID=3 
SCALE=0.017790
LM=6
127.00000 638.00000
822.00000 921.00000
899.00000 563.00000
624.00000 123.00000
345.00000 379.00000
347.00000 654.00000
IMAGE=C:\Users\Will\Dropbox\Morphology to Micorbiome (Salmo salar)\Head morphology\Female head morphology\labelled_final\InkedIMG_0847_result_LI.jpg
ID=4 
SCALE=0.017723
LM=6
60.00000 584.00000
604.00000 873.00000
745.00000 484.00000
493.00000 98.00000
249.00000 384.00000
245.00000 642.00000
IMAGE=C:\Users\Will\Dropbox\Morphology to Micorbiome (Salmo salar)\Head morphology\Female head morphology\labelled_final\InkedIMG_0850_result_LI.jpg
ID=5 
SCALE=0.018518
LM=6
81.00000 454.00000
574.00000 754.00000
685.00000 461.00000
472.00000 140.00000
270.00000 325.00000
249.00000 529.00000
IMAGE=C:\Users\Will\Dropbox\Morphology to Micorbiome (Salmo salar)\Head morphology\Female head morphology\labelled_final\InkedIMG_0852_result_LI.jpg
ID=6 
SCALE=0.018508
LM=6
329.00000 1044.00000
889.00000 1257.00000
941.00000 942.00000
710.00000 665.00000
499.00000 877.00000
518.00000 1104.00000
IMAGE=C:\Users\Will\Dropbox\Morphology to Micorbiome (Salmo salar)\Head morphology\Female head morphology\labelled_final\InkedIMG_0862_result_LI.jpg
ID=7 
SCALE=0.017990
LM=6
343.00000 888.00000
893.00000 1157.00000
1066.00000 757.00000
822.00000 409.00000
539.00000 669.00000
539.00000 934.00000
IMAGE=C:\Users\Will\Dropbox\Morphology to Micorbiome (Salmo salar)\Head morphology\Female head morphology\labelled_final\InkedIMG_0865_result_LI.jpg
ID=8 
SCALE=0.018114
LM=6
329.00000 1025.00000
987.00000 1229.00000
1072.00000 761.00000
785.00000 454.00000
516.00000 757.00000
562.00000 1031.00000
IMAGE=C:\Users\Will\Dropbox\Morphology to Micorbiome (Salmo salar)\Head morphology\Female head morphology\labelled_final\InkedIMG_0867_result_LI.jpg
ID=9 
SCALE=0.017981
LM=6
356.00000 940.00000
993.00000 1156.00000
1081.00000 686.00000
797.00000 359.00000
497.00000 686.00000
550.00000 946.00000
IMAGE=C:\Users\Will\Dropbox\Morphology to Micorbiome (Salmo salar)\Head morphology\Female head morphology\labelled_final\InkedIMG_0869_result_LI.jpg
ID=10 
SCALE=0.017836
LM=6
293.00000 1067.00000
993.00000 1298.00000
1064.00000 781.00000
747.00000 467.00000
499.00000 784.00000
525.00000 1079.00000
IMAGE=C:\Users\Will\Dropbox\Morphology to Micorbiome (Salmo salar)\Head morphology\Female head morphology\labelled_final\InkedIMG_0873_result_LI.jpg
ID=11 
SCALE=0.018039
LM=6
224.00000 738.00000
745.00000 950.00000
845.00000 611.00000
602.00000 350.00000
393.00000 571.00000
404.00000 782.00000
IMAGE=C:\Users\Will\Dropbox\Morphology to Micorbiome (Salmo salar)\Head morphology\Female head morphology\labelled_final\InkedIMG_0875_result_LI.jpg
ID=12 
SCALE=0.018145
LM=6
231.00000 732.00000
700.00000 967.00000
837.00000 629.00000
641.00000 329.00000
397.00000 529.00000
393.00000 759.00000
IMAGE=C:\Users\Will\Dropbox\Morphology to Micorbiome (Salmo salar)\Head morphology\Female head morphology\labelled_final\InkedIMG_0877_result_LI.jpg
ID=13 
SCALE=0.018058
LM=6
252.00000 786.00000
864.00000 1044.00000
966.00000 582.00000
693.00000 244.00000
404.00000 563.00000
449.00000 840.00000
IMAGE=C:\Users\Will\Dropbox\Morphology to Micorbiome (Salmo salar)\Head morphology\Female head morphology\labelled_final\InkedIMG_0879_result_LI.jpg
ID=14 
SCALE=0.018342
LM=6
260.00000 981.00000
1024.00000 1298.00000
1175.00000 821.00000
847.00000 350.00000
527.00000 715.00000
541.00000 1040.00000
IMAGE=C:\Users\Will\Dropbox\Morphology to Micorbiome (Salmo salar)\Head morphology\Female head morphology\labelled_final\InkedIMG_0881_result_LI.jpg
ID=15 
SCALE=0.018422
LM=6
231.00000 871.00000
858.00000 1104.00000
914.00000 673.00000
643.00000 365.00000
393.00000 657.00000
424.00000 902.00000
IMAGE=C:\Users\Will\Dropbox\Morphology to Micorbiome (Salmo salar)\Head morphology\Female head morphology\labelled_final\InkedIMG_0883_result_LI.jpg
ID=16 
SCALE=0.018075
LM=6
245.00000 806.00000
739.00000 984.00000
814.00000 650.00000
585.00000 386.00000
381.00000 640.00000
400.00000 832.00000
IMAGE=C:\Users\Will\Dropbox\Morphology to Micorbiome (Salmo salar)\Head morphology\Female head morphology\labelled_final\InkedIMG_0885_result_LI.jpg
ID=17 
SCALE=0.018173
LM=6
266.00000 754.00000
741.00000 950.00000
814.00000 617.00000
627.00000 340.00000
393.00000 586.00000
422.00000 779.00000
IMAGE=C:\Users\Will\Dropbox\Morphology to Micorbiome (Salmo salar)\Head morphology\Female head morphology\labelled_final\InkedIMG_0887_result_LI.jpg
ID=18 
SCALE=0.018138
LM=6
262.00000 806.00000
775.00000 969.00000
887.00000 669.00000
658.00000 356.00000
437.00000 596.00000
470.00000 829.00000
IMAGE=C:\Users\Will\Dropbox\Morphology to Micorbiome (Salmo salar)\Head morphology\Female head morphology\labelled_final\InkedIMG_0889_result_LI.jpg
ID=19 
SCALE=0.018000
LM=6
233.00000 790.00000
874.00000 1079.00000
947.00000 682.00000
695.00000 336.00000
445.00000 607.00000
443.00000 875.00000
IMAGE=C:\Users\Will\Dropbox\Morphology to Micorbiome (Salmo salar)\Head morphology\Female head morphology\labelled_final\InkedIMG_0891_result_LI.jpg
ID=20 
SCALE=0.018202
LM=6
277.00000 802.00000
806.00000 1071.00000
937.00000 675.00000
752.00000 359.00000
458.00000 600.00000
449.00000 846.00000
IMAGE=C:\Users\Will\Dropbox\Morphology to Micorbiome (Salmo salar)\Head morphology\Female head morphology\labelled_final\InkedIMG_0894_result_LI.jpg
ID=21 
SCALE=0.018083
LM=6
250.00000 946.00000
812.00000 1136.00000
916.00000 709.00000
637.00000 473.00000
406.00000 738.00000
452.00000 975.00000
IMAGE=C:\Users\Will\Dropbox\Morphology to Micorbiome (Salmo salar)\Head morphology\Female head morphology\labelled_final\InkedIMG_0896_result_LI.jpg
ID=22 
SCALE=0.018086
LM=6
222.00000 884.00000
862.00000 1146.00000
993.00000 713.00000
679.00000 382.00000
429.00000 657.00000
456.00000 952.00000
IMAGE=C:\Users\Will\Dropbox\Morphology to Micorbiome (Salmo salar)\Head morphology\Female head morphology\labelled_final\InkedIMG_0898_result_LI.jpg
ID=23 
SCALE=0.018080
LM=6
295.00000 909.00000
997.00000 1125.00000
1106.00000 650.00000
804.00000 242.00000
477.00000 584.00000
524.00000 888.00000
IMAGE=C:\Users\Will\Dropbox\Morphology to Micorbiome (Salmo salar)\Head morphology\Female head morphology\labelled_final\InkedIMG_0900_result_LI.jpg
ID=24 
SCALE=0.017935
LM=6
274.00000 694.00000
916.00000 979.00000
1033.00000 559.00000
745.00000 181.00000
518.00000 469.00000
516.00000 734.00000
IMAGE=C:\Users\Will\Dropbox\Morphology to Micorbiome (Salmo salar)\Head morphology\Female head morphology\labelled_final\InkedIMG_0902_result_LI.jpg
ID=25 
SCALE=0.017888
LM=6
275.00000 771.00000
822.00000 1050.00000
966.00000 663.00000
781.00000 311.00000
481.00000 561.00000
477.00000 796.00000
IMAGE=C:\Users\Will\Dropbox\Morphology to Micorbiome (Salmo salar)\Head morphology\Female head morphology\labelled_final\InkedIMG_0905_result_LI.jpg
ID=26 
SCALE=0.017918
LM=6
324.00000 800.00000
870.00000 967.00000
983.00000 561.00000
758.00000 309.00000
493.00000 571.00000
545.00000 806.00000
IMAGE=C:\Users\Will\Dropbox\Morphology to Micorbiome (Salmo salar)\Head morphology\Female head morphology\labelled_final\InkedIMG_0907_result_LI.jpg
ID=27 
SCALE=0.018181
LM=6
279.00000 782.00000
633.00000 915.00000
722.00000 663.00000
566.00000 486.00000
414.00000 654.00000
416.00000 792.00000
IMAGE=C:\Users\Will\Dropbox\Morphology to Micorbiome (Salmo salar)\Head morphology\Female head morphology\labelled_final\InkedIMG_0909_result_LI.jpg
ID=28 
SCALE=0.017917
LM=6
283.00000 777.00000
837.00000 950.00000
947.00000 525.00000
716.00000 250.00000
452.00000 534.00000
475.00000 748.00000
IMAGE=C:\Users\Will\Dropbox\Morphology to Micorbiome (Salmo salar)\Head morphology\Female head morphology\labelled_final\InkedIMG_0911_result_LI.jpg
ID=29 
SCALE=0.018051
LM=6
243.00000 690.00000
699.00000 907.00000
808.00000 609.00000
633.00000 371.00000
422.00000 542.00000
429.00000 748.00000
IMAGE=C:\Users\Will\Dropbox\Morphology to Micorbiome (Salmo salar)\Head morphology\Female head morphology\labelled_final\InkedIMG_0913_result_LI.jpg
ID=30 
SCALE=0.018082
LM=6
239.00000 756.00000
779.00000 1057.00000
941.00000 654.00000
666.00000 309.00000
416.00000 596.00000
420.00000 834.00000
IMAGE=C:\Users\Will\Dropbox\Morphology to Micorbiome (Salmo salar)\Head morphology\Female head morphology\labelled_final\InkedIMG_0915_result_LI.jpg
ID=31 
SCALE=0.018014
LM=6
264.00000 798.00000
881.00000 1036.00000
1010.00000 602.00000
729.00000 246.00000
499.00000 550.00000
481.00000 802.00000
IMAGE=C:\Users\Will\Dropbox\Morphology to Micorbiome (Salmo salar)\Head morphology\Female head morphology\labelled_final\InkedIMG_0917_result_LI.jpg
ID=32 
SCALE=0.018014
LM=6
333.00000 1835.00000
949.00000 1916.00000
978.00000 1575.00000
738.00000 1309.00000
513.00000 1585.00000
588.00000 1796.00000
IMAGE=C:\Users\Will\Dropbox\Morphology to Micorbiome (Salmo salar)\Head morphology\Female head morphology\labelled_final\InkedIMG_0934_result_LI.jpg
ID=34 
SCALE=0.018014
LM=6
461.00000 2006.00000
1168.00000 2009.00000
1151.00000 1566.00000
783.00000 1316.00000
618.00000 1671.00000
745.00000 1918.00000
IMAGE=C:\Users\Will\Dropbox\Morphology to Micorbiome (Salmo salar)\Head morphology\Female head morphology\labelled_final\InkedIMG_0936_result_LI.jpg
ID=35 
SCALE=0.018014

LM=6
544.00000 1906.00000
1186.00000 2133.00000
1301.00000 1699.00000
1008.00000 1348.00000
766.00000 1645.00000
783.00000 1938.00000
IMAGE=C:\Users\Will\Dropbox\Morphology to Micorbiome (Salmo salar)\Head morphology\Female head morphology\labelled_final\InkedIMG_0947_result_LI.jpg
ID=40 
SCALE=0.018723
LM=6
605.00000 2062.00000
1288.00000 2170.00000
1344.00000 1745.00000
1018.00000 1418.00000
766.00000 1757.00000
871.00000 2009.00000
IMAGE=C:\Users\Will\Dropbox\Morphology to Micorbiome (Salmo salar)\Head morphology\Female head morphology\labelled_final\InkedIMG_0951_result_LI.jpg
ID=42 
SCALE=0.018547
LM=6
632.00000 1931.00000
1327.00000 1982.00000
1354.00000 1533.00000
1027.00000 1226.00000
781.00000 1584.00000
896.00000 1838.00000
IMAGE=C:\Users\Will\Dropbox\Morphology to Micorbiome (Salmo salar)\Head morphology\Female head morphology\labelled_final\InkedIMG_0953_result_LI.jpg
ID=43 
SCALE=0.018499
LM=6
535.00000 1689.00000
1105.00000 1789.00000
1140.00000 1413.00000
857.00000 1177.00000
674.00000 1452.00000
732.00000 1657.00000
IMAGE=C:\Users\Will\Dropbox\Morphology to Micorbiome (Salmo salar)\Head morphology\Female head morphology\labelled_final\InkedIMG_0956_result_LI.jpg
ID=45 
SCALE=0.018585
LM=6
564.00000 1687.00000
1079.00000 1801.00000
1154.00000 1438.00000
881.00000 1201.00000
698.00000 1455.00000
747.00000 1667.00000
IMAGE=C:\Users\Will\Dropbox\Morphology to Micorbiome (Salmo salar)\Head morphology\Female head morphology\labelled_final\InkedIMG_0961_result_LI.jpg
ID=47 
SCALE=0.018585
LM=6
598.00000 1994.00000
1225.00000 2135.00000
1286.00000 1652.00000
954.00000 1370.00000
752.00000 1726.00000
805.00000 1972.00000
IMAGE=C:\Users\Will\Dropbox\Morphology to Micorbiome (Salmo salar)\Head morphology\Female head morphology\labelled_final\InkedIMG_0963_result_LI.jpg
ID=48 
SCALE=0.018585
LM=6
481.00000 1789.00000
1083.00000 1872.00000
1081.00000 1474.00000
801.00000 1265.00000
608.00000 1552.00000
696.00000 1760.00000
IMAGE=C:\Users\Will\Dropbox\Morphology to Micorbiome (Salmo salar)\Head morphology\Female head morphology\labelled_final\InkedIMG_0966_result_LI.jpg
ID=49 
SCALE=0.018585
LM=6
435.00000 1699.00000
971.00000 1765.00000
1010.00000 1409.00000
740.00000 1138.00000
549.00000 1455.00000
642.00000 1655.00000
IMAGE=C:\Users\Will\Dropbox\Morphology to Micorbiome (Salmo salar)\Head morphology\Female head morphology\labelled_final\InkedIMG_0974_result_LI.jpg
ID=53 
SCALE=0.018585

LM=6
427.00000 1789.00000
1088.00000 1918.00000
1110.00000 1540.00000
798.00000 1231.00000
610.00000 1528.00000
703.00000 1789.00000
IMAGE=C:\Users\Will\Dropbox\Morphology to Micorbiome (Salmo salar)\Head morphology\Female head morphology\labelled_final\InkedIMG_0978_result_LI.jpg
ID=55 
SCALE=0.018585
LM=6
464.00000 1845.00000
957.00000 1909.00000
959.00000 1540.00000
701.00000 1333.00000
547.00000 1618.00000
618.00000 1809.00000
IMAGE=C:\Users\Will\Dropbox\Morphology to Micorbiome (Salmo salar)\Head morphology\Female head morphology\labelled_final\InkedIMG_0980_result_LI.jpg
ID=56 
SCALE=0.018790
LM=6
474.00000 1804.00000
983.00000 1867.00000
996.00000 1533.00000
764.00000 1299.00000
566.00000 1562.00000
625.00000 1765.00000
IMAGE=C:\Users\Will\Dropbox\Morphology to Micorbiome (Salmo salar)\Head morphology\Female head morphology\labelled_final\InkedIMG_0982_result_LI.jpg
ID=57 
SCALE=0.018957
LM=6
405.00000 1799.00000
1147.00000 1889.00000
1147.00000 1440.00000
783.00000 1092.00000
569.00000 1457.00000
659.00000 1740.00000
IMAGE=C:\Users\Will\Dropbox\Morphology to Micorbiome (Salmo salar)\Head morphology\Female head morphology\labelled_final\InkedIMG_0986_result_LI.jpg
ID=59 
SCALE=0.019375
LM=6
293.00000 1872.00000
881.00000 1955.00000
940.00000 1594.00000
647.00000 1309.00000
452.00000 1594.00000
510.00000 1816.00000
IMAGE=C:\Users\Will\Dropbox\Morphology to Micorbiome (Salmo salar)\Head morphology\Female head morphology\labelled_final\InkedIMG_0990_result_LI.jpg
ID=61 
SCALE=0.019502
LM=6
415.00000 2065.00000
1125.00000 2167.00000
1069.00000 1723.00000
696.00000 1421.00000
540.00000 1828.00000
657.00000 2060.00000
IMAGE=C:\Users\Will\Dropbox\Morphology to Micorbiome (Salmo salar)\Head morphology\Female head morphology\labelled_final\InkedIMG_0992_result_LI.jpg
ID=62 
SCALE=0.019375
LM=6
432.00000 1870.00000
1066.00000 1938.00000
1071.00000 1567.00000
788.00000 1289.00000
569.00000 1577.00000
652.00000 1816.00000
IMAGE=C:\Users\Will\Dropbox\Morphology to Micorbiome (Salmo salar)\Head morphology\Female head morphology\labelled_final\InkedIMG_0994_result_LI.jpg
ID=63 
SCALE=0.019188
LM=6
649.00000 2057.00000
1281.00000 2074.00000
1288.00000 1648.00000
905.00000 1401.00000
781.00000 1765.00000
879.00000 1999.00000
IMAGE=C:\Users\Will\Dropbox\Morphology to Micorbiome (Salmo salar)\Head morphology\Female head morphology\labelled_final\InkedIMG_0998_result_LI.jpg
ID=65 
SCALE=0.018566
LM=6
613.00000 1631.00000
1240.00000 1787.00000
1271.00000 1387.00000
1013.00000 1067.00000
798.00000 1362.00000
842.00000 1604.00000
IMAGE=C:\Users\Will\Dropbox\Morphology to Micorbiome (Salmo salar)\Head morphology\Female head morphology\labelled_final\InkedIMG_1000_result_LI.jpg
ID=66 
SCALE=0.018762
LM=6
593.00000 1638.00000
1264.00000 1748.00000
1315.00000 1338.00000
1013.00000 1021.00000
783.00000 1343.00000
842.00000 1589.00000
IMAGE=C:\Users\Will\Dropbox\Morphology to Micorbiome (Salmo salar)\Head morphology\Female head morphology\labelled_final\InkedIMG_1005_result_LI.jpg
ID=68 
SCALE=0.018855
LM=6
319.00000 807.00000
822.00000 988.00000
903.00000 650.00000
679.00000 358.00000
463.00000 574.00000
487.00000 804.00000
IMAGE=C:\Users\Will\Dropbox\Morphology to Micorbiome (Salmo salar)\Head morphology\Female head morphology\labelled_final\InkedIMG_1059_result_LI.jpg
ID=69 
SCALE=0.018867
LM=6
290.00000 763.00000
809.00000 1001.00000
930.00000 652.00000
757.00000 309.00000
479.00000 542.00000
465.00000 774.00000
IMAGE=C:\Users\Will\Dropbox\Morphology to Micorbiome (Salmo salar)\Head morphology\Female head morphology\labelled_final\InkedIMG_1061_result_LI.jpg
ID=70 
SCALE=0.019047
LM=6
276.00000 815.00000
795.00000 1082.00000
868.00000 771.00000
663.00000 452.00000
460.00000 671.00000
457.00000 871.00000
IMAGE=C:\Users\Will\Dropbox\Morphology to Micorbiome (Salmo salar)\Head morphology\Female head morphology\labelled_final\InkedIMG_1065_result_LI.jpg
ID=71 
SCALE=0.019118
LM=6
287.00000 869.00000
946.00000 1158.00000
1049.00000 698.00000
763.00000 252.00000
487.00000 598.00000
495.00000 882.00000
IMAGE=C:\Users\Will\Dropbox\Morphology to Micorbiome (Salmo salar)\Head morphology\Female head morphology\labelled_final\InkedIMG_1067_result_LI.jpg
ID=72 
SCALE=0.019267
LM=6
352.00000 928.00000
919.00000 1139.00000
995.00000 807.00000
746.00000 477.00000
517.00000 717.00000
538.00000 952.00000
IMAGE=C:\Users\Will\Dropbox\Morphology to Micorbiome (Salmo salar)\Head morphology\Female head morphology\labelled_final\InkedIMG_1070_result_LI.jpg
ID=73 
SCALE=0.018506
LM=6
365.00000 896.00000
944.00000 1115.00000
1017.00000 701.00000
822.00000 385.00000
549.00000 617.00000
552.00000 871.00000
IMAGE=C:\Users\Will\Dropbox\Morphology to Micorbiome (Salmo salar)\Head morphology\Female head morphology\labelled_final\InkedIMG_1072_result_LI.jpg
ID=74 
SCALE=0.018867
LM=6
392.00000 925.00000
979.00000 1166.00000
1144.00000 763.00000
909.00000 415.00000
587.00000 669.00000
579.00000 917.00000
IMAGE=C:\Users\Will\Dropbox\Morphology to Micorbiome (Salmo salar)\Head morphology\Female head morphology\labelled_final\InkedIMG_1074_result_LI.jpg
ID=75 
SCALE=0.018404
LM=6
379.00000 793.00000
979.00000 1028.00000
1057.00000 644.00000
860.00000 320.00000
573.00000 552.00000
573.00000 788.00000
IMAGE=C:\Users\Will\Dropbox\Morphology to Micorbiome (Salmo salar)\Head morphology\Female head morphology\labelled_final\InkedIMG_1076_result_LI.jpg
ID=76 
SCALE=0.018725
LM=6
392.00000 888.00000
919.00000 1082.00000
984.00000 750.00000
768.00000 493.00000
544.00000 690.00000
563.00000 893.00000
IMAGE=C:\Users\Will\Dropbox\Morphology to Micorbiome (Salmo salar)\Head morphology\Female head morphology\labelled_final\InkedIMG_1078_result_LI.jpg
ID=77 
SCALE=0.018308
LM=6
401.00000 858.00000
1041.00000 1117.00000
1192.00000 642.00000
968.00000 225.00000
622.00000 520.00000
619.00000 817.00000
IMAGE=C:\Users\Will\Dropbox\Morphology to Micorbiome (Salmo salar)\Head morphology\Female head morphology\labelled_final\InkedIMG_1080_result_LI.jpg
ID=78 
SCALE=0.018797
LM=6
382.00000 874.00000
1036.00000 1098.00000
1184.00000 628.00000
957.00000 252.00000
628.00000 512.00000
619.00000 796.00000
IMAGE=C:\Users\Will\Dropbox\Morphology to Micorbiome (Salmo salar)\Head morphology\Female head morphology\labelled_final\InkedIMG_1083_result_LI.jpg
ID=79 
SCALE=0.018832
LM=6
441.00000 788.00000
928.00000 961.00000
1001.00000 631.00000
811.00000 401.00000
601.00000 593.00000
606.00000 785.00000
IMAGE=C:\Users\Will\Dropbox\Morphology to Micorbiome (Salmo salar)\Head morphology\Female head morphology\labelled_final\InkedIMG_1085_result_LI.jpg
ID=80 
SCALE=0.018619
LM=6
433.00000 766.00000
1033.00000 1004.00000
1146.00000 544.00000
941.00000 209.00000
633.00000 461.00000
633.00000 725.00000
IMAGE=C:\Users\Will\Dropbox\Morphology to Micorbiome (Salmo salar)\Head morphology\Female head morphology\labelled_final\InkedIMG_1087_result_LI.jpg
ID=81 
SCALE=0.018757
LM=6
409.00000 804.00000
992.00000 1034.00000
1106.00000 639.00000
887.00000 339.00000
617.00000 561.00000
606.00000 788.00000
IMAGE=C:\Users\Will\Dropbox\Morphology to Micorbiome (Salmo salar)\Head morphology\Female head morphology\labelled_final\InkedIMG_1089_result_LI.jpg
ID=82 
SCALE=0.018724
LM=6
446.00000 769.00000
990.00000 980.00000
1084.00000 612.00000
882.00000 293.00000
611.00000 515.00000
622.00000 744.00000
IMAGE=C:\Users\Will\Dropbox\Morphology to Micorbiome (Salmo salar)\Head morphology\Female head morphology\labelled_final\InkedIMG_1091_result_LI.jpg
ID=83 
SCALE=0.018724
LM=6
428.00000 712.00000
1065.00000 985.00000
1236.00000 615.00000
990.00000 117.00000
673.00000 415.00000
644.00000 696.00000
IMAGE=C:\Users\Will\Dropbox\Morphology to Micorbiome (Salmo salar)\Head morphology\Female head morphology\labelled_final\InkedIMG_1093_result_LI.jpg
ID=84 
SCALE=0.018652
LM=6
444.00000 736.00000
1073.00000 955.00000
1179.00000 490.00000
949.00000 166.00000
652.00000 431.00000
652.00000 704.00000
IMAGE=C:\Users\Will\Dropbox\Morphology to Micorbiome (Salmo salar)\Head morphology\Female head morphology\labelled_final\InkedIMG_1096_result_LI.jpg
ID=85 
SCALE=0.018652
LM=6
468.00000 839.00000
1044.00000 1044.00000
1163.00000 650.00000
968.00000 293.00000
644.00000 601.00000
666.00000 799.00000
IMAGE=C:\Users\Will\Dropbox\Morphology to Micorbiome (Salmo salar)\Head morphology\Female head morphology\labelled_final\InkedIMG_1098_result_LI.jpg
ID=86 
SCALE=0.018653

LM=6
517.00000 907.00000
1209.00000 1142.00000
1330.00000 620.00000
1106.00000 223.00000
757.00000 528.00000
755.00000 839.00000
IMAGE=C:\Users\Will\Dropbox\Morphology to Micorbiome (Salmo salar)\Head morphology\Female head morphology\labelled_final\InkedIMG_1107_result_LI.jpg
ID=89 
SCALE=0.018653
LM=6
490.00000 950.00000
1176.00000 1152.00000
1255.00000 655.00000
952.00000 288.00000
682.00000 609.00000
719.00000 907.00000
IMAGE=C:\Users\Will\Dropbox\Morphology to Micorbiome (Salmo salar)\Head morphology\Female head morphology\labelled_final\InkedIMG_1110_result_LI.jpg
ID=90 
SCALE=0.018653
LM=6
541.00000 831.00000
1130.00000 1036.00000
1209.00000 601.00000
960.00000 298.00000
746.00000 561.00000
757.00000 809.00000
IMAGE=C:\Users\Will\Dropbox\Morphology to Micorbiome (Salmo salar)\Head morphology\Female head morphology\labelled_final\InkedIMG_1114_result_LI.jpg
ID=91 
SCALE=0.018653
LM=6
476.00000 901.00000
1149.00000 1117.00000
1301.00000 644.00000
1049.00000 285.00000
709.00000 588.00000
717.00000 861.00000
IMAGE=C:\Users\Will\Dropbox\Morphology to Micorbiome (Salmo salar)\Head morphology\Female head morphology\labelled_final\InkedIMG_1115_result_LI.jpg
ID=92 
SCALE=0.018653
LM=6
492.00000 904.00000
1203.00000 1163.00000
1328.00000 688.00000
1022.00000 280.00000
738.00000 615.00000
736.00000 915.00000
IMAGE=C:\Users\Will\Dropbox\Morphology to Micorbiome (Salmo salar)\Head morphology\Female head morphology\labelled_final\InkedIMG_1117_result_LI.jpg
ID=93 
SCALE=0.018653
LM=6
530.00000 1888.00000
1330.00000 2269.00000
1495.00000 1823.00000
1158.00000 1333.00000
819.00000 1642.00000
771.00000 1952.00000
IMAGE=C:\Users\Will\Dropbox\Morphology to Micorbiome (Salmo salar)\Head morphology\Female head morphology\labelled_final\InkedIMG_1120_result_LI.jpg
ID=94 
SCALE=0.018460
LM=6
60.00000 1831.00000
736.00000 2190.00000
830.00000 1809.00000
544.00000 1347.00000
288.00000 1627.00000
273.00000 1917.00000
IMAGE=C:\Users\Will\Dropbox\Morphology to Micorbiome (Salmo salar)\Head morphology\Female head morphology\labelled_final\InkedIMG_1124_result_LI.jpg
ID=95 
SCALE=0.018460
